# Supplementary material for: Detecting Mutually Exclusive Interactions in Protein-Protein Interaction Maps
Source: PLoS One. 2012 Jun 8;7(6):e38765. doi: 10.1371/journal.pone.0038765 (PMC3370996; doi:10.1371/journal.pone.0038765)
Supplement: Table S1 — Results of the analysis of the seven interactomes listed in Table 1 . The table lists the SwissProt code of the hub protein, the PDB codes of the proteins forming the known complex and those identified by the Estrella procedure, the number of correctly identified and incorrectly identified residues. Data can be further analyzed by accessing the Estrella web server. (XLS) [file pone.0038765.s001.xls]

## Sheet: cluster
Sub-network	Rank	Known complex	Estrella prediction	Number of correcty identified residues / Total number of residues at the interface	Incorrectly identified residues / Total number of residues at the interface
ATPB_YEAST	1	2HLDG|2HLDI|2HLDL	2HLDG|2HLDI|2HLDL	6/9	0/9
B2MG_HUMAN	1	1A1MA|1A9EA|1HSBA|1IM9E|1K5NA|1OGAA|1ONQC|1XR9A|2BVPA|2DYPA|2H26A|2H6PA|3BO8A|3BZFA|3D2UD|3HUJC|3KPMA|3M17C|3O4LA	1A1MA|1A9EA|1HSBA|1IM9E|1K5NA|1OGAA|1XR9A|2BVPA|2DYPA|2H26A|2H6PA|3BO8A|3BZFA|3KPMA|3O4LA	0/45	0/45
B2MG_MOUSE	1	1BIIA|1CD1C|1K8DA|1LDPH|1S7QA|1S7UD	1BIIA|1CD1C|1K8DA|1LDPH|1S7QA|1S7UD	1/18	0/18
BET3_YEAST	1	3CUEA|3CUEF|3CUEI|3CUEN	3CUEA|3CUEI|3CUEN	9/9	0/9
BLM10_YEAST	1	1VSYS|1VSYU|3L5QK	1VSYA|1VSYP|1VSYS|1VSYU|3L5QK	6/15	3/15
CALM_HUMAN	1	2R28D|3EWTE|3G43E	2R28D|3EWTE|3G43E	9/9	0/9
CDC42_HUMAN	1	1CEEB|1CF4B|1KI1D|2NGRB|2ODBB	1CEEB|1CF4B|1KI1D|2NGRB	8/12	0/12
CDK2_HUMAN	1	1FQ1A|1JSUC|2CCIF|2JGZB|2X1NB	1FQ1A|2CCIF|2JGZB	3/9	0/9
CO3_HUMAN	1	2ICET|2WIIC|2XWJI	1GHQB|2WIIC|2XWJI	0/9	0/9
CTNB1_HUMAN	1	1LUJB|1TH1C|2GL7B	1LUJB|1P22A|1TH1C	4/9	0/9
CY1_YEAST	1	3CX5A|3CX5C|3CX5H|3CX5I|3CX5P	3CX5A|3CX5C|3CX5H|3CX5I|3CX5P	11/15	0/15
CYB_YEAST	1	3CX5D|3CX5G|3CX5H|3CX5L	3CX5D|3CX5E|3CX5G|3CX5L	2/12	3/12
DPO3X_ECOLI	1	1JR3D|1JR3E|3GLIO	1JR3D|1JR3E|3GLIO	3/9	0/9
EP300_HUMAN	1	1L3EA|1P4QA	1L3EA|1P4QA|2K8FB	6/9	3/9
EXOS1_HUMAN	1	2NN6C|2NN6D	2NN6C|2NN6D|2NN6H	0/9	0/9
EXOS2_HUMAN	1	2NN6B|2NN6E	2NN6B|2NN6E|2NN6I	0/9	0/9
EXOS5_HUMAN	1	2NN6C|2NN6G	2NN6B|2NN6C|2NN6I	1/9	0/9
EXOS7_HUMAN	1	2NN6B|2NN6H	2NN6B|2NN6H|2NN6I	5/9	0/9
FGF1_HUMAN	1	1EVTD|1RY7B|2K4AA|2KI4C|3CU1A	1EVTD|1RY7B|3CU1A	9/9	0/9
FIBA_HUMAN	1	2A45B|3GHGB|3GHGF	2A45B|3GHGB|3GHGF	6/9	0/9
GDI1_YEAST	1	2BCGY|3CPHA|3CPJB	2BCGY|3CPHA|3CPJB	9/12	0/12
H2A1_YEAST	1	1ID3A|1ID3F|1ID3H	1ID3A|1ID3F|1ID3H	7/9	0/9
SMAD4_HUMAN	1	1MR1C|1U7FA|1U7VA	1MR1C|1U7FA|1U7VA	7/9	0/9
STX1A_RAT	1	1SFCC|1SFCE|3C98A	1SFCC|1SFCE|3C98A	7/9	0/9
SUMO1_HUMAN	1	1WYWA|1Z5SD|2ASQB|2G4DA|2IO2A|2KQSB|2PE6A|3KYCA|3KYCB	1Z5SD|2G4DA|2IO2A|3KYCB	6/12	0/12
SUS1_YEAST	1	3FWBA|3FWCN|3M99D|3MHSA|3MHSC	3FWBA|3M99D|3MHSA|3MHSC	6/12	0/12
TFS2_YEAST	1	1Y1VA|1Y1VB	1Y1VA|1Y1VB|1Y1VI|3GTME	0/12	0/12
TGFR1_HUMAN	1	2PJYA|3KFDA|3KFDG	1B6CC|2PJYA|3KFDA	6/9	1/9
THRB_HUMAN	1	1JMOA|1NROR|2A45J|3GISZ	1JMOA|2A45J|2B5TI	3/9	0/9
TRS23_YEAST	1	3CUED|3CUEU	3CUED|3CUEN|3CUEU	3/9	0/9
TRS31_YEAST	1	3CUEM|3CUEP	3CUEM|3CUEP|3CUEU	3/9	2/9
UBA3_HUMAN	1	1YOVA|2NVUC|3DBHI	1YOVA|2NVUC|3FN1B	5/9	0/9
UBIQ_HUMAN	1	1NBFA|1S1QC|1XD3A|2IBIA|2K6DA|2KDFA|2KHWA|3IFWA|3IHPB|3JW0C|3LDZC	1XD3A|2KDFA|3IFWA|3LDZC	3/12	0/12
UBIQ_YEAST	1	1OTRA|1Q0WA|1WR1B|3CMMC	1OTRA|1Q0WA|3CMMC	6/9	0/9
UBP8_YEAST	1	3M99D|3MHSB|3MHSC	3M99D|3MHSB|3MHSC	9/9	0/9
UCRI_YEAST	1	3CX5I|3CX5L|3CX5O|3CX5S	3CX5I|3CX5N|3CX5O|3CX5S	7/12	0/12
VPS25_HUMAN	1	2ZMEA|2ZMEB	2ZMEA|2ZMEB|3HTUH	3/9	3/9
YPT1_YEAST	1	2BCGG|3CUEE|3CUEU	2BCGG|3CUEE|3CUEU	6/9	0/9
RPB3_YEAST	1	1TWFA|1TWFB|1TWFK	1TWFA|1TWFB|1TWFK|3CQZH|3CQZJ	3/15	6/15
RPB4_YEAST	1	2B8KG|3HOUA|3HOUN	2B8KG|3HOUA|3HOUN	3/9	0/9
RPB7_YEAST	1	3HOUB|3HOUD|3HOUM	3HOUB|3HOUD|3HOUM	3/9	0/9
RXRA_HUMAN	1	1XVPD|3E00D	1DSZA|1XVPD|3E00D	1/9	1/9
SGF11_YEAST	1	3M99D|3MHSA|3MHSB	3M99D|3MHSA|3MHSB	6/9	0/9
IL6RB_HUMAN	1	1P9MB|1P9MC|1PVHD	1P9MB|1P9MC|1PVHD	3/9	0/9
JUN_HUMAN	1	1S9KC|1S9KD|1T2KD	1S9KC|1S9KD|1T2KD	6/9	0/9
MCL1_HUMAN	1	2KBWB|3KJ0B|3PK1B	2KBWB|3KJ0B|3PK1B	9/9	0/9
NCOA1_HUMAN	1	1TFCA|3ET1B|3ET3A|3OLLA	3ET1B|3ET3A|3OLLA	9/9	0/9
NEDD8_HUMAN	1	2BKRA|2NVUB|2NVUC|3DQVD	2NVUB|2NVUC|3DQVD	0/9	0/9
PCNA_YEAST	1	1SXJA|1SXJB|1SXJC|1SXJD	1SXJA|1SXJB|1SXJC|1SXJD	0/12	0/12
PP2AA_HUMAN	1	2NPPE|3C5WP|3DW8B	3C5WP|3DW8B|3K7VA	0/9	0/9
PSA1_YEAST	1	1VSY5|1Z7QG|3BDMD|3BDMP	1RYPB|1VSY5|1Z7QG|3BDMC|3BDMD|3BDMP	3/18	0/18
PSA2_YEAST	1	3BDMP|3BDMQ|3BDMR	1G0UE|1G0UU|3BDMP|3BDMQ|3BDMR	3/15	0/15
PSA3_YEAST	1	1G0UG|1G0US|1RYPB|3BDMB	1G0UG|1G0US|1RYPB|3BDMB|3BDMD	3/15	0/15
PSA4_YEAST	1	1RYPP|3BDMC|3BDMR	1RYPP|1VSY8|3BDMC|3BDMR	3/12	0/12
PSA5_YEAST	1	1G0US|1RYPP|3BDMP|3BDMQ	1G0US|1RYPP|1VSY8|1Z7QU|3BDMP|3BDMQ	3/18	0/18
PSA6_YEAST	1	1RYPP|1VSY4|1Z7QU|3BDMB	1RYPP|1Z7QU|3BDMB|3BDMC|3BDMD	4/15	0/15
PSA7_YEAST	1	1RYPP|3BDMB|3BDMR	1RYPP|1VSY8|3BDMB|3BDMR	3/12	0/12
PSB1_YEAST	1	1G0U1|1G0US	1G0U1|1G0UI|1G0US	0/9	0/9
PSB2_YEAST	1	1RYPL|3BDMC|3BDMP	1G0UI|1RYPL|3BDMC	0/9	0/9
PSB3_YEAST	1	1RYPB|1RYPY|3BDMP	1G0UZ|1RYPY|3BDMP	0/9	0/9
HLAE_HUMAN	1	3BZED|3CDGK	3BZED|3CDGE|3CDGK	3/9	0/9
PSB4_YEAST	1	1G0UZ|1RYPH|3BDMH	1G0UZ|1RYPH|1Z7QG|3BDMH	1/12	3/12
RPB2_YEAST	1	1TWFA|2B8KG|3CQZF	1TWFA|3CQZF|3CQZH|3HOUP|3HOYC	0/15	2/15
SKP1_HUMAN	1	1LDKA|1P22A|2ASTB|2OVRB|3L2OB	1LDKA|1P22A|2OVRB	1/9	0/9
PSB5_YEAST	1	3BDMC|3BDMR	1G0UI|3BDMC|3BDMR	0/9	0/9
PSB6_YEAST	1	1G0U1|1G0UU|1Z7QU|3BDMH	1G0U1|1G0UU|1G0UZ|1Z7QU	0/12	0/12
PSB7_YEAST	1	1G0UI|3BDMP	1G0UG|1G0UI|1G0UZ|1RYPP|3BDMP	3/15	0/15
QCR1_YEAST	1	3CX5D|3CX5N|3CX5P|3CX5R|3CX5S	3CX5D|3CX5N|3CX5P|3CX5R|3CX5S|3CX5T	3/18	0/18
QCR6_YEAST	1	3CX5D|3CX5H	3CX5D|3CX5H|3CX5I	0/9	0/9
QCR7_YEAST	1	3CX5A|3CX5C|3CX5D|3CX5S	3CX5C|3CX5D|3CX5S	1/9	0/9
QCR8_YEAST	1	3CX5C|3CX5D|3CX5L|3CX5P|3CX5R	3CX5C|3CX5D|3CX5P|3CX5R	4/16	0/16
QCR9_YEAST	1	3CX5D|3CX5E|3CX5L	3CX5D|3CX5E|3CX5L	0/9	0/9
RAC1_HUMAN	1	1E96B|1I4DA|2NZ8B|3BJIB	1E96B|1I4DA|2NZ8B	1/9	0/9
RAN_HUMAN	1	1I2MB|1IBRD|1K5DK|1QBKB|1RRPB	1K5DK|1QBKB|1RRPB	6/9	0/9
RBX1_HUMAN	1	1U6GA|1U6GC|2HYEC|3DPLC	1U6GA|1U6GC|2HYEC|3DPLC	3/12	0/12
RFC1_YEAST	1	1SXJB|1SXJC|1SXJD	1SXJC|1SXJD|1SXJE|1SXJG	0/12	1/12
RFC2_YEAST	1	1SXJA|1SXJC|1SXJE	1SXJA|1SXJB|1SXJC	1/9	0/9
RFC3_YEAST	1	1SXJB|1SXJD|1SXJF	1SXJA|1SXJD|1SXJF	0/9	0/9
RFC4_YEAST	1	1SXJA|1SXJC|1SXJD|1SXJE	1SXJC|1SXJD|1SXJE|1SXJG	2/12	0/12
RFC5_YEAST	1	1SXJA|1SXJD	1SXJA|1SXJB|1SXJC|1SXJD	1/12	0/12
RHOA_HUMAN	1	1OW3A|1S1CY|1X86C|3KZ1A	1OW3A|1X86C|3KZ1A	4/9	0/9
RPAB1_YEAST	1	3CQZA|3CQZB|3CQZF	3CQZA|3CQZF|3GTMS	0/9	0/9
RPAB2_YEAST	1	3CQZA|3CQZB|3CQZE	3CQZA|3CQZB|3CQZE|3HOUD	0/12	0/12
RPAB3_YEAST	1	3CQZA|3CQZK	3CQZA|3CQZK|3HOYC	3/9	0/9
RPAB4_YEAST	1	3CQZB|3CQZJ|3HOYC	3CQZB|3CQZJ|3CQZK	0/9	0/9
RPAB5_YEAST	1	3CQZB|3CQZL|3HOYC	3CQZB|3CQZL|3HOYC	7/9	0/9
RPB11_YEAST	1	1TWFA|1TWFB|3CQZL|3HOYC	1TWFA|3CQZL|3HOYC	3/9	0/9
RPB1_YEAST	1	1TWFB|3CQZE|3CQZF	1TWFB|1TWFI|3CQZF|3CQZH	3/12	5/12
B2MG_HUMAN	2	1A1MA|1A9EA|1HSBA|1IM9E|1K5NA|1OGAA|1ONQC|1XR9A|2BVPA|2DYPA|2H26A|2H6PA|3BO8A|3BZFA|3D2UD|3HUJC|3KPMA|3M17C|3O4LA	1A1MA|1K5NA	6/12	0/12
B2MG_MOUSE	2	1BIIA|1CD1C|1K8DA|1LDPH|1S7QA|1S7UD	1BIIA|1K8DA|1LDPH|1S7QA|1S7UD	0/15	0/15
BLM10_YEAST	2	3L5QT|3L5QU	1VSYP|3L5QT|3L5QU	0/18	0/18
CALM_HUMAN	2	2R28D|3EWTE|3G43E	2R28D|3EWTE|3G43E	9/9	0/9
CDC42_HUMAN	2	1CEEB|1CF4B|1KI1D|2NGRB|2ODBB	1CEEB|1CF4B|1KI1D|2NGRB	9/12	0/12
CO3_HUMAN	2	2ICET|2WIIC|2XWJI	2ICET|2WIIC|2XWJI	4/9	0/9
CTNB1_HUMAN	2	1LUJB|1TH1C|2GL7B	1LUJB|1TH1C|2GL7B	9/9	0/9
CY1_YEAST	2	3CX5A|3CX5C|3CX5H|3CX5I|3CX5P	3CX5C|3CX5G|3CX5H|3CX5I|3CX5P	3/15	0/15
CYB_YEAST	2	3CX5D|3CX5G|3CX5H|3CX5L	3CX5D|3CX5E|3CX5G|3CX5H	10/12	0/12
EP300_HUMAN	2	1L3EA|1P4QA	1L3EA|1P4QA|2K8FB	6/9	3/9
EXOS1_HUMAN	2	2NN6C|2NN6G	2NN6C|2NN6E|2NN6H	2/9	3/9
EXOS7_HUMAN	2	2NN6B|2NN6H	2NN6B|2NN6H|2NN6I	3/9	0/9
FIBA_HUMAN	2	2A45B|3GHGB|3GHGF	2A45B|3GHGB|3GHGF	7/9	0/9
SMAD4_HUMAN	2	1MR1C|1U7FA|1U7VA	1MR1C|1U7FA|1U7VA	7/9	0/9
STX1A_RAT	2	1SFCC|1SFCE|3C98A	1SFCC|1SFCE|3C98A	6/9	0/9
SUMO1_HUMAN	2	1WYWA|1Z5SD|2ASQB|2G4DA|2IO2A|2KQSB|2PE6A|3KYCA|3KYCB	1Z5SD|2ASQB|2KQSB|3KYCB	12/12	0/12
SUS1_YEAST	2	3FWBA|3FWCN|3M99D|3MHSA|3MHSC	3FWBA|3M99D|3MHSA|3MHSC	9/12	0/12
TFS2_YEAST	2	1Y1VA|1Y1VB	1Y1VA|1Y1VB|3GTME	0/9	0/9
TGFR1_HUMAN	2	2PJYA|3KFDA|3KFDG	2PJYA|3KFDA|3KFDG	5/9	0/9
THRB_HUMAN	2	1JMOA|1NROR|2A45J|3GISZ	1JMOA|1P8VA|3GISZ	4/9	3/9
TRS23_YEAST	2	3CUED|3CUEU	3CUED|3CUEN|3CUEU	0/9	0/9
UBA3_HUMAN	2	1YOVA|2NVUC|3DBHI	1YOVA|2NVUC|3FN1B	5/9	0/9
UBIQ_HUMAN	2	1NBFA|1S1QC|1XD3A|2IBIA|2K6DA|2KDFA|2KHWA|3IFWA|3IHPB|3JW0C|3LDZC	1NBFA|3IHPB|3JW0C|3LDZC	5/12	0/12
UCRI_YEAST	2	3CX5I|3CX5L|3CX5O|3CX5S	3CX5I|3CX5N|3CX5O|3CX5S	7/12	0/12
VPS25_HUMAN	2	2ZMEA|2ZMEB	2ZMEA|2ZMEB|3HTUH	3/9	3/9
RPB3_YEAST	2	1TWFB|1TWFK|3CQZJ|3CQZL	1TWFA|1TWFB|3CQZJ|3CQZL	0/12	3/12
RPB4_YEAST	2	2B8KG|3HOUA|3HOUN	2B8KG|3HOUA|3HOUN	6/9	0/9
RPB7_YEAST	2	3HOUD|3HOUF|3HOUM	3HOUD|3HOUF|3HOUM	3/9	0/9
RXRA_HUMAN	2	1YNWA|3E00D	1XVPD|1YNWA|3E00D	0/9	0/9
SGF11_YEAST	2	3M99D|3MHSA|3MHSB	3M99D|3MHSA|3MHSB	3/9	0/9
JUN_HUMAN	2	1S9KC|1S9KD|1T2KD	1S9KC|1S9KD|1T2KD	6/9	0/9
NCOA1_HUMAN	2	1TFCA|3ET1B|3ET3A|3OLLA	1TFCA|3ET1B|3ET3A	0/9	0/9
NEDD8_HUMAN	2	2BKRA|2NVUB|2NVUC|3DQVD	2NVUB|2NVUC|3DQVD	2/9	0/9
PCNA_YEAST	2	1SXJA|1SXJB|1SXJC|1SXJD	1SXJA|1SXJC|1SXJD	0/9	0/9
PP2AA_HUMAN	2	2NPPE|3K7VA	2NPPE|3FGAD|3K7VA	3/9	0/9
PSA1_YEAST	2	1RYPB|1Z7QG|3BDMD|3BDMP	1G0U1|1G0UZ|1RYPB|3BDMC|3BDMP	9/15	3/15
PSA2_YEAST	2	1G0UU|3BDMP|3BDMQ	1G0UE|1G0UU|1G0UW|1VSY7|3BDMP|3BDMQ	2/18	0/18
PSA3_YEAST	2	1G0UG|1G0US|1VSY7|3BDMB	1G0UG|1G0US|1VSY7|3BDMB|3BDMD	0/15	0/15
PSA4_YEAST	2	1RYPP|3BDMC|3BDMR	1RYPP|1RYPY|3BDMC|3BDMV	6/12	0/12
PSA5_YEAST	2	1G0US|1G0UZ|1VSY8	1G0US|1G0UZ|1RYPZ|1VSY8|1Z7QU	1/15	0/15
PSA6_YEAST	2	1RYPP|1VSY4|1Z7QU|3BDMB	1G0U1|1RYPP|1VSY4|3BDMB|3BDMC	7/15	0/15
PSA7_YEAST	2	1VSY8|3BDMB	1RYPK|1RYPL|1VSY8|3BDMB	0/12	0/12
PSB1_YEAST	2	1G0UI|1RYPL|3BDMV	1G0UI|1RYPL|3BDMD|3BDMV	2/12	0/12
PSB2_YEAST	2	1G0UI|3BDMP	1G0UI|1RYPL|3BDMP	2/9	0/9
PSB3_YEAST	2	1RYPL|1RYPY|3BDMV	1G0UZ|1RYPL|1RYPY	0/9	0/9
PSB4_YEAST	2	1G0US|1G0UZ	1G0UG|1G0US|1G0UZ	0/9	2/9
RPB2_YEAST	2	1TWFA|2B8KG|3CQZF	1TWFA|1TWFI|3CQZF|3CQZH	1/12	1/12
SKP1_HUMAN	2	1LDKA|1P22A|2ASTB|2OVRB|3L2OB	1LDKA|1P22A|2OVRB|3L2OB	3/12	0/12
PSB5_YEAST	2	1G0UI|1RYPY|3BDMH	1RYPY|3BDMC|3BDMH	3/9	0/9
PSB6_YEAST	2	1G0U1|1G0UU|1Z7QU|3BDMH	1G0U1|1G0UU|1G0UZ	3/9	0/9
PSB7_YEAST	2	1G0UM|1G0UZ|1RYPV	1G0UG|1G0UI|1G0UM|1G0UZ|3BDMP	2/15	5/15
QCR1_YEAST	2	3CX5D|3CX5N|3CX5P|3CX5R|3CX5S	3CX5D|3CX5N|3CX5R|3CX5S|3CX5T	2/15	0/15
QCR6_YEAST	2	3CX5D|3CX5H	3CX5D|3CX5H|3CX5I	0/9	0/9
QCR7_YEAST	2	3CX5A|3CX5C|3CX5D|3CX5S	3CX5C|3CX5D|3CX5S	3/9	0/9
QCR8_YEAST	2	3CX5C|3CX5D|3CX5L|3CX5P|3CX5R	3CX5C|3CX5D|3CX5P|3CX5R	3/12	0/12
QCR9_YEAST	2	3CX5D|3CX5E|3CX5L	3CX5D|3CX5E|3CX5L	1/9	0/9
RAC1_HUMAN	2	1E96B|1I4DA|2NZ8B|3BJIB	1E96B|1I4DA|2NZ8B	1/9	0/9
RAN_HUMAN	2	1I2MB|1IBRD|1K5DK|1QBKB|1RRPB	1IBRD|1K5DK|1QBKB	3/9	0/9
RBX1_HUMAN	2	1U6GA|1U6GC|2HYEC|3DPLC	1U6GA|2HYEC|3DPLC	8/12	0/12
RFC1_YEAST	2	1SXJB|1SXJC|1SXJD	1SXJC|1SXJD|1SXJG	0/9	0/9
RFC2_YEAST	2	1SXJA|1SXJC|1SXJE	1SXJC|1SXJE|1SXJF	4/9	0/9
RFC3_YEAST	2	1SXJB|1SXJD|1SXJE	1SXJB|1SXJD|1SXJE	3/9	0/9
RFC4_YEAST	2	1SXJA|1SXJC|1SXJD|1SXJE	1SXJC|1SXJD|1SXJG	0/9	1/9
RFC5_YEAST	2	1SXJA|1SXJD	1SXJA|1SXJC|1SXJD	0/9	0/9
RHOA_HUMAN	2	1OW3A|1S1CY|1X86C|3KZ1A	1OW3A|1X86C|3KZ1A	9/9	0/9
RPAB1_YEAST	2	3CQZA|3CQZB|3CQZF	3CQZA|3CQZB|3CQZF	0/9	0/9
RPAB2_YEAST	2	3CQZA|3CQZE|3HOUG	3CQZA|3HOUD|3HOUG	0/9	0/9
RPAB3_YEAST	2	3CQZA|3CQZK	3CQZA|3CQZB|3CQZK	0/9	0/9
RPAB4_YEAST	2	3CQZB|3CQZJ|3HOYC	3CQZB|3CQZJ|3CQZK	0/9	0/9
RPAB5_YEAST	2	3CQZB|3CQZL|3HOYC	3CQZB|3CQZL|3HOYC	2/9	0/9
RPB11_YEAST	2	1TWFA|1TWFB|3CQZL|3HOYC	1TWFA|1TWFB|3CQZL|3HOYC	1/12	0/12
RPB1_YEAST	2	1TWFB|3K7AM	1TWFB|3CQZE|3CQZH|3K7AM	0/12	5/12
B2MG_HUMAN	3	1A1MA|1A9EA|1HSBA|1IM9E|1K5NA|1OGAA|1ONQC|1XR9A|2BVPA|2DYPA|2H26A|2H6PA|3BO8A|3BZFA|3D2UD|3HUJC|3KPMA|3M17C|3O4LA	1A1MA|1A9EA|1HSBA|1IM9E|1K5NA|1OGAA|1XR9A|2BVPA|2DYPA|2H6PA|3BO8A|3BZFA|3HUJC|3KPMA|3O4LA	3/45	0/45
B2MG_MOUSE	3	1BIIA|1CD1C|1K8DA|1LDPH|1S7QA|1S7UD	1BIIA|1K8DA|1LDPH|1S7QA|1S7UD	0/15	0/15
BLM10_YEAST	3	1VSYA|1VSYP	1VSYA|1VSYP|1VSYS|3L5QU	2/12	0/12
CALM_HUMAN	3	2R28D|3EWTE|3G43E	2R28D|3EWTE|3G43E	9/9	0/9
CDC42_HUMAN	3	1CEEB|1CF4B|1KI1D|2NGRB|2ODBB	1CEEB|1CF4B|1KI1D	6/9	0/9
CY1_YEAST	3	3CX5A|3CX5C|3CX5H|3CX5I|3CX5P	3CX5C|3CX5H|3CX5I|3CX5P	3/12	0/12
CYB_YEAST	3	3CX5D|3CX5G|3CX5H|3CX5L	3CX5D|3CX5E|3CX5H|3CX5L	7/12	0/12
EP300_HUMAN	3	1L3EA|1P4QA	1L3EA|1P4QA|2K8FB	6/9	3/9
EXOS1_HUMAN	3	2NN6C|2NN6D	2NN6C|2NN6D|2NN6E	3/9	0/9
EXOS7_HUMAN	3	2NN6B|2NN6H	2NN6B|2NN6H|2NN6I	3/9	0/9
FIBA_HUMAN	3	2A45B|3GHGB|3GHGF	2A45B|3GHGB|3GHGF	6/9	0/9
SMAD4_HUMAN	3	1MR1C|1U7FA|1U7VA	1MR1C|1U7FA|1U7VA	7/9	0/9
STX1A_RAT	3	1SFCC|1SFCE|3C98A	1SFCC|1SFCE|3C98A	7/9	0/9
SUMO1_HUMAN	3	1WYWA|1Z5SD|2ASQB|2G4DA|2IO2A|2KQSB|2PE6A|3KYCA|3KYCB	1Z5SD|2ASQB|2KQSB|3KYCA	9/12	0/12
SUS1_YEAST	3	3FWBA|3FWCN|3M99D|3MHSA|3MHSC	3FWCN|3M99D|3MHSA	3/9	0/9
TFS2_YEAST	3	1Y1VA|1Y1VB	1Y1VA|1Y1VB|3GTME	0/9	0/9
THRB_HUMAN	3	1JMOA|1NROR|2A45J|3GISZ	1JMOA|2A45J|3GISZ	5/9	0/9
TRS23_YEAST	3	3CUED|3CUEU	3CUED|3CUEN|3CUEU	3/9	0/9
UBA3_HUMAN	3	1YOVA|2NVUC|3DBHI	1YOVA|2NVUC|3FN1B	5/9	0/9
UBIQ_HUMAN	3	1NBFA|1S1QC|1XD3A|2IBIA|2K6DA|2KDFA|2KHWA|3IFWA|3IHPB|3JW0C|3LDZC	1S1QC|1XD3A|3IFWA|3IHPB|3LDZC	4/15	0/15
UCRI_YEAST	3	3CX5I|3CX5L|3CX5O|3CX5S	3CX5I|3CX5N|3CX5O|3CX5S	6/12	0/12
VPS25_HUMAN	3	2ZMEA|2ZMEB	2ZMEA|2ZMEB|3HTUH	3/9	3/9
RPB3_YEAST	3	1TWFA|1TWFB|1TWFK	1TWFA|1TWFB|1TWFK|3CQZJ	6/12	0/12
RXRA_HUMAN	3	1YNWA|3E00D	1XVPD|1YNWA|3E00D	0/9	0/9
SGF11_YEAST	3	3M99D|3MHSA|3MHSB	3M99D|3MHSA|3MHSB	6/9	0/9
JUN_HUMAN	3	1S9KC|1S9KD|1T2KD	1S9KC|1S9KD|1T2KD	6/9	0/9
NCOA1_HUMAN	3	1TFCA|3ET1B|3ET3A|3OLLA	1TFCA|3ET3A|3OLLA	2/9	0/9
NEDD8_HUMAN	3	2BKRA|2NVUB|2NVUC|3DQVD	2NVUB|2NVUC|3DQVD	0/9	0/9
PP2AA_HUMAN	3	3C5WP|3FGAD	3C5WP|3DW8B|3FGAD	3/9	0/9
PSA1_YEAST	3	1VSY5|1Z7QG|3BDMD|3BDMP	1G0UZ|1VSY5|3BDMP	0/9	0/9
PSA2_YEAST	3	1G0UW|3BDMV	1G0UU|1G0UW|1VSY7|3BDMQ|3BDMR|3BDMV	0/18	3/18
PSA3_YEAST	3	1G0UG|1G0US|1RYPB|3BDMB	1G0UG|1RYPB|1RYPH|3BDMB|3BDMD	0/15	0/15
PSA4_YEAST	3	1VSY8|3BDMC	1G0UI|1VSY8|3BDMC|3BDMR	3/12	0/12
PSA5_YEAST	3	1G0US|1G0UZ|1VSY8	1G0US|1G0UZ|1VSY8|3BDMP	0/12	0/12
PSA6_YEAST	3	1RYPP|3BDMH	1G0U1|1RYPP|1Z7QU|3BDMC|3BDMH	0/15	0/15
PSA7_YEAST	3	1RYPP|3BDMB|3BDMR	1RYPL|1RYPP|1VSY8|3BDMB|3BDMR	3/15	0/15
PSB1_YEAST	3	1G0UI|1RYPL|3BDMV	1G0UI|1RYPL|3BDMD|3BDMV	3/12	0/12
PSB2_YEAST	3	1RYPL|3BDMC|3BDMP	1G0UI|1RYPL|3BDMC	2/9	0/9
PSB3_YEAST	3	1RYPB|1RYPY|3BDMP	1G0UZ|1RYPB|3BDMP	0/9	2/9
PSB4_YEAST	3	1G0US|1Z7QG	1G0UG|1G0US|1Z7QG	0/9	0/9
RPB2_YEAST	3	1TWFA|1TWFK|3CQZJ|3HOYC	1TWFA|1TWFI|1TWFK|3CQZH|3CQZJ|3HOYC	0/18	6/18
SKP1_HUMAN	3	1LDKA|1P22A|2ASTB|2OVRB|3L2OB	1LDKA|2OVRB|3L2OB	0/9	0/9
PSB5_YEAST	3	1G0UI|1RYPY|3BDMH	1RYPY|3BDMC|3BDMH	3/9	0/9
PSB6_YEAST	3	1G0U1|1G0UU|1Z7QU|3BDMH	1G0U1|1G0UU|1G0UZ	5/9	0/9
PSB7_YEAST	3	1G0UM|1G0UZ|1RYPV	1G0UG|1G0UM|1G0UZ|1RYPL	0/12	0/12
QCR1_YEAST	3	3CX5D|3CX5P|3CX5S|3CX5T	3CX5D|3CX5N|3CX5P|3CX5S|3CX5T	8/15	0/15
QCR6_YEAST	3	3CX5D|3CX5H	3CX5D|3CX5H|3CX5I	0/9	0/9
QCR7_YEAST	3	3CX5C|3CX5M|3CX5S	3CX5D|3CX5M|3CX5S	6/9	0/9
QCR8_YEAST	3	3CX5C|3CX5D|3CX5L|3CX5P|3CX5R	3CX5D|3CX5F|3CX5L|3CX5P	0/12	0/12
QCR9_YEAST	3	3CX5D|3CX5E|3CX5L	3CX5D|3CX5E|3CX5L	0/9	0/9
RAN_HUMAN	3	1I2MB|1IBRD|1K5DK|1QBKB|1RRPB	1IBRD|1K5DK|1QBKB	3/9	0/9
RBX1_HUMAN	3	1U6GA|1U6GC|2HYEC|3DPLC	1U6GA|1U6GC|2HYEC|3DPLC	3/12	0/12
RFC1_YEAST	3	1SXJB|1SXJE	1SXJB|1SXJD|1SXJE	5/9	0/9
RFC2_YEAST	3	1SXJB|1SXJC|1SXJE	1SXJB|1SXJE|1SXJF	3/9	0/9
RFC3_YEAST	3	1SXJB|1SXJD|1SXJE	1SXJA|1SXJB|1SXJE	1/9	0/9
RFC4_YEAST	3	1SXJA|1SXJC|1SXJD|1SXJE	1SXJA|1SXJC|1SXJD	2/9	0/9
RHOA_HUMAN	3	1OW3A|1S1CY|1X86C|3KZ1A	1CXZB|1S1CY|3KZ1A	4/9	0/9
RPAB1_YEAST	3	3CQZA|3CQZB|3CQZF	3CQZA|3CQZB|3CQZF	3/9	0/9
RPAB2_YEAST	3	3CQZA|3CQZE|3HOUG	3CQZA|3CQZE|3HOUD	0/9	0/9
RPAB3_YEAST	3	3CQZA|3CQZK	3CQZA|3CQZB|3CQZK	0/9	0/9
RPAB4_YEAST	3	3CQZB|3CQZJ|3HOYC	3CQZB|3CQZJ|3CQZK	0/9	0/9
RPAB5_YEAST	3	3CQZB|3CQZL|3HOYC	3CQZB|3CQZL|3HOYC	3/9	0/9
RPB11_YEAST	3	1TWFA|1TWFB|3CQZL|3HOYC	1TWFB|3CQZH|3CQZL|3HOYC	3/12	0/12
RPB1_YEAST	3	1TWFB|3CQZE|3CQZF	1TWFB|1TWFK|3CQZE|3CQZF	6/12	0/12
B2MG_HUMAN	4	1A1MA|1A9EA|1HSBA|1IM9E|1K5NA|1OGAA|1ONQC|1XR9A|2BVPA|2DYPA|2H26A|2H6PA|3BO8A|3BZFA|3D2UD|3HUJC|3KPMA|3M17C|3O4LA	1A1MA|1HSBA|1IM9E|1K5NA|1OGAA|1ONQC|1XR9A|2BVPA|2DYPA|2H26A|2H6PA|3BZFA|3HUJC|3KPMA|3O4LA	0/45	0/45
B2MG_MOUSE	4	1BIIA|1CD1C|1K8DA|1LDPH|1S7QA|1S7UD	1BIIA|1K8DA|1LDPH|1S7QA|1S7UD	0/15	0/15
BLM10_YEAST	4	1VSYA|1VSYP	1VSYA|1VSYP|3L5QK|3L5QU	6/12	3/12
CALM_HUMAN	4	2R28D|3EWTE|3G43E	2R28D|3EWTE|3G43E	9/9	0/9
CDC42_HUMAN	4	1CEEB|1CF4B|1KI1D|2NGRB|2ODBB	1CEEB|1KI1D|2NGRB	2/9	0/9
CY1_YEAST	4	3CX5A|3CX5C|3CX5H|3CX5I|3CX5P	3CX5C|3CX5H|3CX5I|3CX5P	8/12	0/12
CYB_YEAST	4	3CX5D|3CX5E|3CX5H	3CX5D|3CX5E|3CX5H	8/9	0/9
EP300_HUMAN	4	1L3EA|1P4QA	1L3EA|1P4QA|2K8FB	6/9	3/9
EXOS1_HUMAN	4	2NN6C|2NN6G	2NN6C|2NN6E|2NN6H	0/9	0/9
STX1A_RAT	4	1SFCC|1SFCE|3C98A	1SFCC|1SFCE|3C98A	7/9	0/9
SUMO1_HUMAN	4	1WYWA|1Z5SD|2ASQB|2G4DA|2IO2A|2KQSB|2PE6A|3KYCA|3KYCB	1Z5SD|2ASQB|2KQSB|3KYCB	12/12	0/12
SUS1_YEAST	4	3FWBA|3FWCN|3M99D|3MHSA|3MHSC	3FWCN|3M99D|3MHSA	4/9	0/9
TFS2_YEAST	4	1Y1VA|1Y1VB	1Y1VA|1Y1VB|3GTME	0/9	0/9
THRB_HUMAN	4	1JMOA|1NROR|2A45J|3GISZ	1JMOA|2B5TI|3GISZ	2/9	0/9
TRS23_YEAST	4	3CUED|3CUEU	3CUED|3CUEN|3CUEU	3/9	0/9
UBA3_HUMAN	4	1YOVA|2NVUC|3DBHI	1YOVA|2NVUC|3FN1B	4/9	0/9
UBIQ_HUMAN	4	1NBFA|1S1QC|1XD3A|2IBIA|2K6DA|2KDFA|2KHWA|3IFWA|3IHPB|3JW0C|3LDZC	1XD3A|2KHWA|3IFWA|3IHPB|3JW0C	3/15	0/15
UCRI_YEAST	4	3CX5I|3CX5L|3CX5O|3CX5S	3CX5I|3CX5N|3CX5O|3CX5S	6/12	0/12
RPB3_YEAST	4	1TWFA|1TWFB|1TWFK	1TWFA|1TWFB|1TWFK	0/9	0/9
RXRA_HUMAN	4	1YNWA|3E00D	1XVPD|1YNWA|3E00D	0/9	2/9
SGF11_YEAST	4	3M99D|3MHSA|3MHSB	3M99D|3MHSA|3MHSB	6/9	0/9
JUN_HUMAN	4	1S9KC|1S9KD|1T2KD	1S9KC|1S9KD|1T2KD	6/9	0/9
NCOA1_HUMAN	4	1TFCA|3ET1B|3ET3A|3OLLA	1TFCA|3ET3A|3OLLA	1/9	0/9
PP2AA_HUMAN	4	3C5WP|3FGAD	2NPPE|3C5WP|3FGAD	3/9	0/9
PSA1_YEAST	4	1G0U1|1G0UZ	1G0U1|1G0UZ|3BDMC|3BDMP	6/12	3/12
PSA2_YEAST	4	1VSY7|3BDMP	1G0UE|1G0UU|1VSY7|3BDMP|3BDMR	3/15	0/15
PSA3_YEAST	4	1G0UG|1G0US|1VSY7|3BDMB	1G0U1|1RYPB|1VSY7|3BDMB	6/12	0/12
PSA4_YEAST	4	1VSY8|3BDMC	1G0UI|1VSY8|3BDMR	0/9	0/9
PSA5_YEAST	4	1G0US|1RYPP|3BDMP|3BDMQ	1G0UZ|1RYPP|1Z7QU|3BDMP|3BDMQ	2/15	1/15
PSA6_YEAST	4	1RYPP|1VSY4|1Z7QU|3BDMB	1RYPH|1RYPP|3BDMB|3BDMD	3/12	0/12
PSA7_YEAST	4	1RYPP|3BDMB|3BDMR	1RYPK|1RYPP|3BDMB|3BDMR	3/12	3/12
PSB1_YEAST	4	1RYPL|3BDMD	1G0UI|1RYPL|3BDMD	0/9	0/9
PSB2_YEAST	4	1G0UI|3BDMP	1G0UI|1RYPL|3BDMP	0/9	0/9
PSB3_YEAST	4	1RYPB|1RYPY|3BDMP	1RYPB|1RYPY|3BDMV	3/9	0/9
PSB4_YEAST	4	1G0US|1G0UZ	1G0UG|1G0US|1G0UZ|1RYPH	2/12	0/12
RPB2_YEAST	4	1TWFA|1TWFK|3CQZJ|3HOYC	1TWFA|1TWFK|3CQZH|3CQZJ|3HOUP	1/15	3/15
SKP1_HUMAN	4	1LDKA|1P22A|2ASTB|2OVRB|3L2OB	1LDKA|2OVRB|3L2OB	0/9	0/9
PSB5_YEAST	4	1G0UI|1RYPY|3BDMH	1G0UI|1G0UL|1RYPY	0/9	0/9
PSB6_YEAST	4	1G0U1|1G0UU|1Z7QU|3BDMH	1G0U1|1G0UU|1G0UZ	5/9	0/9
PSB7_YEAST	4	1G0UM|1G0UZ|1RYPV	1G0UM|1G0UZ|1RYPP|1RYPV	3/12	0/12
QCR1_YEAST	4	3CX5D|3CX5P|3CX5S|3CX5T	3CX5D|3CX5P|3CX5S|3CX5T	1/12	0/12
QCR6_YEAST	4	3CX5D|3CX5H	3CX5D|3CX5H|3CX5I	0/9	0/9
QCR7_YEAST	4	3CX5A|3CX5M	3CX5A|3CX5D|3CX5M	6/9	0/9
QCR8_YEAST	4	3CX5C|3CX5D|3CX5L|3CX5P|3CX5R	3CX5C|3CX5D|3CX5P	1/9	0/9
QCR9_YEAST	4	3CX5D|3CX5E|3CX5L	3CX5D|3CX5E|3CX5F	0/9	0/9
RAN_HUMAN	4	1I2MB|1IBRD|1K5DK|1QBKB|1RRPB	1I2MB|1IBRD|1K5DK|1QBKB	4/12	0/12
RBX1_HUMAN	4	1U6GA|1U6GC|2HYEC|3DPLC	1U6GA|1U6GC|2HYEC|3DPLC	1/12	0/12
RFC1_YEAST	4	1SXJB|1SXJE	1SXJB|1SXJC|1SXJE	3/9	0/9
RFC2_YEAST	4	1SXJA|1SXJC|1SXJE	1SXJA|1SXJB|1SXJC|1SXJE	4/12	0/12
RFC3_YEAST	4	1SXJB|1SXJD|1SXJF	1SXJB|1SXJD|1SXJF	1/9	0/9
RFC4_YEAST	4	1SXJA|1SXJC|1SXJD|1SXJE	1SXJA|1SXJC|1SXJD	4/9	0/9
RHOA_HUMAN	4	1OW3A|1S1CY|1X86C|3KZ1A	1CXZB|1OW3A|1S1CY	6/9	0/9
RPAB1_YEAST	4	3CQZA|3CQZB|3CQZF	3CQZA|3CQZB|3CQZF	0/9	0/9
RPAB2_YEAST	4	3CQZA|3CQZB|3CQZE	3CQZA|3CQZB|3CQZE	0/9	0/9
RPAB3_YEAST	4	3CQZA|3CQZK	3CQZA|3CQZB|3CQZK	0/9	0/9
RPB11_YEAST	4	1TWFA|1TWFB|3CQZL|3HOYC	1TWFB|3CQZH|3CQZL	0/9	1/9
RPB1_YEAST	4	1TWFB|3CQZE|3CQZF	1TWFB|1TWFI|3CQZF|3CQZH	3/12	6/12
B2MG_HUMAN	5	1A1MA|1A9EA|1HSBA|1IM9E|1K5NA|1OGAA|1ONQC|1XR9A|2BVPA|2DYPA|2H26A|2H6PA|3BO8A|3BZFA|3D2UD|3HUJC|3KPMA|3M17C|3O4LA	1A1MA|1A9EA|1HSBA|1IM9E|1K5NA|1OGAA|2BVPA|2DYPA|3BO8A|3BZFA|3KPMA|3O4LA	0/36	0/36
B2MG_MOUSE	5	1BIIA|1CD1C|1K8DA|1LDPH|1S7QA|1S7UD	1BIIA|1CD1C|1K8DA|1LDPH|1S7UD	3/15	0/15
BLM10_YEAST	5	3L5QT|3L5QU	1VSYP|3L5QT|3L5QU	0/9	0/9
CALM_HUMAN	5	2R28D|3EWTE|3G43E	2R28D|3EWTE|3G43E	9/9	0/9
CDC42_HUMAN	5	1CEEB|1CF4B|1KI1D|2NGRB|2ODBB	1CEEB|1CF4B|2ODBB	7/9	0/9
CY1_YEAST	5	3CX5A|3CX5G|3CX5H|3CX5P	3CX5A|3CX5G|3CX5P|3CX5W	3/12	0/12
CYB_YEAST	5	3CX5D|3CX5E|3CX5H	3CX5D|3CX5E|3CX5H	9/9	0/9
EP300_HUMAN	5	1L3EA|1P4QA	1L3EA|1P4QA|2K8FB	6/9	3/9
EXOS1_HUMAN	5	2NN6C|2NN6G	2NN6C|2NN6G|2NN6H	3/9	0/9
STX1A_RAT	5	1SFCC|1SFCE|3C98A	1SFCC|1SFCE|3C98A	9/9	0/9
SUMO1_HUMAN	5	1WYWA|1Z5SD|2ASQB|2G4DA|2IO2A|2KQSB|2PE6A|3KYCA|3KYCB	1WYWA|1Z5SD|2ASQB	9/9	0/9
SUS1_YEAST	5	3FWBA|3FWCN|3M99D|3MHSA|3MHSC	3FWCN|3M99D|3MHSC	3/9	0/9
TFS2_YEAST	5	1Y1VA|1Y1VB	1Y1VA|1Y1VB|1Y1VI	0/9	0/9
THRB_HUMAN	5	1JMOA|1NROR|2A45J|3GISZ	1JMOA|1P8VA|3GISZ	4/9	3/9
TRS23_YEAST	5	3CUED|3CUEU	3CUED|3CUEN|3CUEU	3/9	0/9
UBA3_HUMAN	5	1YOVA|2NVUC|3DBHI	1YOVA|2NVUC|3FN1B	3/9	0/9
UBIQ_HUMAN	5	1NBFA|1S1QC|1XD3A|2IBIA|2K6DA|2KDFA|2KHWA|3IFWA|3IHPB|3JW0C|3LDZC	1NBFA|3IFWA|3IHPB|3LDZC	6/12	0/12
UCRI_YEAST	5	3CX5I|3CX5L|3CX5O|3CX5S	3CX5I|3CX5N|3CX5O|3CX5S	9/12	0/12
RPB3_YEAST	5	1TWFA|1TWFB|1TWFK	1TWFA|1TWFB|3CQZJ	0/9	2/9
SGF11_YEAST	5	3M99D|3MHSA|3MHSB	3M99D|3MHSA|3MHSB	6/9	0/9
PP2AA_HUMAN	5	2NPPE|3C5WP|3DW8B	2NPPE|3C5WP|3DW8B	2/9	0/9
PSA1_YEAST	5	1RYPB|1Z7QG|3BDMD|3BDMP	1G0UZ|1RYPB|3BDMP	0/9	0/9
PSA2_YEAST	5	3BDMP|3BDMQ|3BDMR	1G0UU|1G0UW|1VSY7|3BDMQ|3BDMR	0/15	3/15
PSA3_YEAST	5	1G0UG|1G0US|1VSY7|3BDMB	1G0U1|1G0UG|1G0US|1RYPB|1VSY7	3/15	0/15
PSA4_YEAST	5	1VSY8|3BDMC	1G0UI|1VSY8|3BDMC|3BDMV	3/12	0/12
PSA5_YEAST	5	1G0US|1G0UZ|1VSY8	1G0UZ|1RYPP|1VSY8|3BDMP	0/12	4/12
PSA6_YEAST	5	1RYPP|1VSY4|1Z7QU|3BDMB	1G0U1|1RYPP|1VSY4|1Z7QU|3BDMC	3/15	0/15
PSA7_YEAST	5	1VSY8|3BDMB	1RYPK|1RYPL|1VSY8|3BDMB	0/12	0/12
PSB1_YEAST	5	1G0UI|1RYPL|3BDMV	1G0UI|1RYPL|3BDMV	3/9	0/9
PSB3_YEAST	5	1RYPB|1RYPY|3BDMP	1G0UZ|1RYPY|3BDMP	0/9	0/9
PSB4_YEAST	5	1G0UZ|1RYPH|3BDMH	1G0UZ|1RYPH|3BDMH	2/9	0/9
RPB2_YEAST	5	1TWFK|3CQZJ|3CQZL|3HOYC	1TWFK|2B8KG|3CQZH|3CQZJ|3HOUP	0/15	6/15
SKP1_HUMAN	5	1LDKA|1P22A|2ASTB|2OVRB|3L2OB	1P22A|2ASTB|3L2OB	0/9	0/9
PSB5_YEAST	5	1G0UI|1RYPY|3BDMH	1G0UI|1G0UL|3BDMH	0/9	0/9
PSB6_YEAST	5	1G0U1|1G0UU|1Z7QU|3BDMH	1G0U1|1G0UU|1G0UZ	0/9	0/9
PSB7_YEAST	5	1G0UG|1RYPP	1G0UG|1RYPP|3BDMP	0/12	0/12
QCR1_YEAST	5	3CX5D|3CX5P|3CX5S|3CX5T	3CX5D|3CX5N|3CX5P|3CX5S|3CX5T	0/15	0/15
QCR6_YEAST	5	3CX5D|3CX5H	3CX5D|3CX5H|3CX5I	0/9	0/9
QCR7_YEAST	5	3CX5A|3CX5M	3CX5A|3CX5D|3CX5M	1/9	0/9
QCR8_YEAST	5	3CX5C|3CX5D|3CX5L|3CX5P|3CX5R	3CX5C|3CX5D|3CX5P	5/9	0/9
QCR9_YEAST	5	3CX5D|3CX5E|3CX5L	3CX5D|3CX5E|3CX5L	0/9	0/9
RAN_HUMAN	5	1I2MB|1IBRD|1K5DK|1QBKB|1RRPB	1IBRD|1K5DK|1RRPB	6/9	0/9
RBX1_HUMAN	5	1U6GA|1U6GC|2HYEC|3DPLC	1U6GA|2HYEC|3DPLC	4/9	0/9
RFC1_YEAST	5	1SXJB|1SXJC|1SXJD	1SXJB|1SXJC|1SXJD	2/9	0/9
RFC2_YEAST	5	1SXJA|1SXJC|1SXJE	1SXJC|1SXJE|1SXJF	0/9	0/9
RFC3_YEAST	5	1SXJB|1SXJD|1SXJF	1SXJB|1SXJD|1SXJF	0/9	0/9
RFC4_YEAST	5	1SXJA|1SXJC|1SXJD|1SXJE	1SXJA|1SXJD|1SXJG	2/9	0/9
RHOA_HUMAN	5	1OW3A|1S1CY|1X86C|3KZ1A	1S1CY|1X86C|3KZ1A	0/9	0/9
RPAB1_YEAST	5	3CQZA|3CQZB|3CQZF	3CQZA|3CQZB|3CQZF	0/9	0/9
RPAB2_YEAST	5	3CQZA|3CQZB|3HOUG	3CQZA|3CQZB|3HOUD	0/9	0/9
RPAB3_YEAST	5	3CQZA|3CQZK	3CQZA|3CQZB|3CQZK	0/9	0/9
RPB11_YEAST	5	1TWFA|1TWFB|3CQZL|3HOYC	1TWFA|1TWFB|3CQZH	0/9	0/9
RPB1_YEAST	5	1TWFB|1TWFK|3CQZH|3HOYC	1TWFB|1TWFK|2B8KG|3CQZH|3HOUP	6/15	2/15
B2MG_HUMAN	6	1A1MA|1A9EA|1HSBA|1IM9E|1K5NA|1OGAA|1ONQC|1XR9A|2BVPA|2DYPA|2H26A|2H6PA|3BO8A|3BZFA|3D2UD|3HUJC|3KPMA|3M17C|3O4LA	1A1MA|1A9EA|1HSBA|1IM9E|1K5NA|1OGAA|1ONQC|1XR9A|2DYPA|2H6PA|3BO8A|3KPMA|3O4LA	36/39	0/39
B2MG_MOUSE	6	1BIIA|1CD1C|1K8DA|1LDPH|1S7QA|1S7UD	1BIIA|1K8DA|1LDPH|1S7QA|1S7UD	2/15	0/15
BLM10_YEAST	6	1VSYA|1VSYU	1VSYA|1VSYP|1VSYS|1VSYU|3L5QT	0/15	1/15
CALM_HUMAN	6	2R28D|3EWTE|3G43E	2R28D|3EWTE|3G43E	9/9	0/9
CDC42_HUMAN	6	1CEEB|1CF4B|1KI1D|2NGRB|2ODBB	1CEEB|1CF4B|1KI1D	6/9	0/9
CY1_YEAST	6	3CX5A|3CX5C|3CX5H|3CX5I|3CX5P	3CX5A|3CX5H|3CX5I|3CX5P	8/12	0/12
CYB_YEAST	6	3CX5D|3CX5E|3CX5H	3CX5D|3CX5E|3CX5H	9/9	0/9
EP300_HUMAN	6	1L3EA|1P4QA	1L3EA|1P4QA|2K8FB	6/9	3/9
EXOS1_HUMAN	6	2NN6C|2NN6D	2NN6C|2NN6D|2NN6H	0/9	0/9
STX1A_RAT	6	1SFCC|1SFCE|3C98A	1SFCC|1SFCE|3C98A	6/9	0/9
SUMO1_HUMAN	6	1WYWA|1Z5SD|2ASQB|2G4DA|2IO2A|2KQSB|2PE6A|3KYCA|3KYCB	1WYWA|2PE6A|3KYCA|3KYCB	1/12	0/12
SUS1_YEAST	6	3FWBA|3FWCN|3M99D|3MHSA|3MHSC	3FWBA|3FWCN|3MHSA	9/9	0/9
TFS2_YEAST	6	1Y1VA|1Y1VB	1Y1VA|1Y1VB|1Y1VI	0/9	0/9
THRB_HUMAN	6	1JMOA|1NROR|2A45J|3GISZ	1JMOA|2A45J|3GISZ	5/9	0/9
UBIQ_HUMAN	6	1NBFA|1S1QC|1XD3A|2IBIA|2K6DA|2KDFA|2KHWA|3IFWA|3IHPB|3JW0C|3LDZC	1NBFA|1S1QC|3IHPB|3JW0C	0/12	0/12
UCRI_YEAST	6	3CX5I|3CX5L|3CX5O|3CX5S	3CX5I|3CX5N|3CX5O|3CX5S	8/12	0/12
RPB3_YEAST	6	1TWFA|1TWFB|1TWFK	1TWFA|1TWFB|1TWFK|3CQZJ	8/12	0/12
PP2AA_HUMAN	6	2NPPE|3C5WP|3DW8B	3C5WP|3DW8B|3K7VA	0/9	0/9
PSA1_YEAST	6	1VSY5|1Z7QG|3BDMD|3BDMP	1G0UZ|1RYPB|1VSY5|3BDMP	5/12	0/12
PSA2_YEAST	6	1G0UU|1VSY7	1G0UU|1G0UW|1VSY7|3BDMR	0/12	0/12
PSA3_YEAST	6	1G0UG|1G0US|1VSY7|3BDMB	1G0UG|1RYPB|1VSY7|3BDMD	0/12	2/12
PSA4_YEAST	6	1G0UI|3BDMV	1G0UI|1VSY8|3BDMR|3BDMV	3/12	0/12
PSA5_YEAST	6	1G0US|1G0UZ|1VSY8	1G0US|1RYPP|1VSY8	3/9	0/9
PSA6_YEAST	6	1G0U1|1RYPH|3BDMH	1G0U1|1RYPH|1RYPP|1VSY4	3/12	0/12
PSA7_YEAST	6	1RYPK|1RYPL	1RYPK|1RYPL|1VSY8	3/9	0/9
PSB1_YEAST	6	1G0U1|1G0US	1G0US|1RYPV|3BDMV	0/9	3/9
PSB3_YEAST	6	1RYPB|1RYPY|3BDMP	1RYPL|1RYPY|3BDMP	0/9	3/9
PSB4_YEAST	6	1G0US|1Z7QG	1G0UG|1G0US|1Z7QG	0/9	0/9
RPB2_YEAST	6	1TWFA|2B8KG|3CQZF	1TWFA|1TWFI|3CQZF|3CQZH	1/12	1/12
SKP1_HUMAN	6	1LDKA|1P22A|2ASTB|2OVRB|3L2OB	1P22A|2ASTB|3L2OB	1/9	0/9
PSB5_YEAST	6	3BDMC|3BDMR	1G0UI|3BDMC|3BDMR	0/9	0/9
PSB6_YEAST	6	1G0U1|1G0UU|1Z7QU|3BDMH	1G0U1|1G0UZ|3BDMH	3/9	0/9
PSB7_YEAST	6	1G0UG|1G0UM|1RYPV	1G0UG|1RYPP|1RYPV|3BDMP	5/12	0/12
QCR1_YEAST	6	3CX5D|3CX5P|3CX5S|3CX5T	3CX5N|3CX5P|3CX5S|3CX5T	4/12	0/12
QCR6_YEAST	6	3CX5D|3CX5H	3CX5D|3CX5H|3CX5I	0/9	0/9
QCR7_YEAST	6	3CX5A|3CX5C|3CX5D|3CX5S	3CX5A|3CX5D|3CX5M|3CX5S	7/12	0/12
QCR8_YEAST	6	3CX5C|3CX5D|3CX5L|3CX5P|3CX5R	3CX5C|3CX5D|3CX5P|3CX5R	6/12	0/12
QCR9_YEAST	6	3CX5D|3CX5E|3CX5L	3CX5D|3CX5E|3CX5L	0/9	0/9
RAN_HUMAN	6	1I2MB|1IBRD|1K5DK|1QBKB|1RRPB	1IBRD|1QBKB|1RRPB	3/9	0/9
RBX1_HUMAN	6	1U6GA|1U6GC|2HYEC|3DPLC	1U6GA|2HYEC|3DPLC	2/9	0/9
RFC1_YEAST	6	1SXJB|1SXJG	1SXJB|1SXJD|1SXJG	2/9	0/9
RFC2_YEAST	6	1SXJA|1SXJC|1SXJE	1SXJA|1SXJC|1SXJE	3/9	0/9
RFC3_YEAST	6	1SXJB|1SXJD|1SXJF	1SXJB|1SXJD|1SXJF	1/9	0/9
RFC4_YEAST	6	1SXJA|1SXJC|1SXJD|1SXJE	1SXJA|1SXJC|1SXJE	3/9	0/9
RHOA_HUMAN	6	1OW3A|1S1CY|1X86C|3KZ1A	1S1CY|1X86C|3KZ1A	0/9	0/9
RPAB1_YEAST	6	3CQZA|3CQZB|3CQZF	3CQZA|3CQZF|3GTMS	0/9	1/9
RPAB2_YEAST	6	3CQZA|3CQZB|3CQZE	3CQZA|3CQZB|3CQZE	0/9	0/9
RPAB3_YEAST	6	3CQZA|3CQZK	3CQZA|3CQZB|3CQZK	0/9	0/9
RPB11_YEAST	6	1TWFA|1TWFB|3CQZL|3HOYC	1TWFA|1TWFB|3CQZH	0/9	0/9
RPB1_YEAST	6	1TWFB|1TWFK|3CQZH|3HOYC	1TWFI|1TWFK|3CQZH|3HOYC	1/12	3/12
B2MG_HUMAN	7	1A1MA|1A9EA|1HSBA|1IM9E|1K5NA|1OGAA|1ONQC|1XR9A|2BVPA|2DYPA|2H26A|2H6PA|3BO8A|3BZFA|3D2UD|3HUJC|3KPMA|3M17C|3O4LA	1A1MA|1A9EA|1HSBA|1K5NA|1OGAA|2BVPA|2DYPA|3KPMA	20/48	0/48
B2MG_MOUSE	7	1BIIA|1CD1C|1K8DA|1LDPH|1S7QA|1S7UD	1K8DA|1S7QA|1S7UD	0/15	0/15
BLM10_YEAST	7	1VSYA|1VSYP	1VSYA|1VSYP|3L5QK|3L5QT	0/12	1/12
CDC42_HUMAN	7	1CEEB|1CF4B|1KI1D|2NGRB|2ODBB	1CF4B|1KI1D|2NGRB	5/9	0/9
CY1_YEAST	7	3CX5A|3CX5C|3CX5H|3CX5I|3CX5P	3CX5C|3CX5H|3CX5I	4/9	0/9
CYB_YEAST	7	3CX5D|3CX5E|3CX5H	3CX5D|3CX5E|3CX5H	9/9	0/9
EP300_HUMAN	7	1L3EA|1P4QA	1L3EA|1P4QA|2K8FB	6/9	3/9
STX1A_RAT	7	1SFCC|1SFCE|3C98A	1SFCC|1SFCE|3C98A	6/9	0/9
SUMO1_HUMAN	7	1WYWA|1Z5SD|2ASQB|2G4DA|2IO2A|2KQSB|2PE6A|3KYCA|3KYCB	1Z5SD|3KYCA|3KYCB	0/9	0/9
SUS1_YEAST	7	3FWBA|3FWCN|3M99D|3MHSA|3MHSC	3FWBA|3M99D|3MHSC	6/9	0/9
TFS2_YEAST	7	1Y1VA|1Y1VB	1Y1VA|1Y1VB|3GTME	2/9	0/9
THRB_HUMAN	7	1JMOA|1NROR|2A45J|3GISZ	1JMOA|2A45J|3GISZ	5/9	0/9
UBIQ_HUMAN	7	1NBFA|1S1QC|1XD3A|2IBIA|2K6DA|2KDFA|2KHWA|3IFWA|3IHPB|3JW0C|3LDZC	1NBFA|2IBIA|2KDFA|3IFWA|3IHPB	6/15	0/15
UCRI_YEAST	7	3CX5I|3CX5L|3CX5O|3CX5S	3CX5I|3CX5N|3CX5O|3CX5S	9/12	0/12
RPB3_YEAST	7	1TWFA|1TWFB|1TWFK	1TWFA|1TWFK|3CQZJ	5/9	0/9
PSA1_YEAST	7	1RYPB|1Z7QG|3BDMD|3BDMP	1RYPB|3BDMD|3BDMP	0/9	0/9
PSA2_YEAST	7	1G0UW|3BDMV	1G0UE|1VSY7|3BDMQ|3BDMV	0/12	0/12
PSA3_YEAST	7	1G0U1|1G0UG|1RYPH	1G0U1|1G0UG|1RYPH|3BDMB	0/12	0/12
PSA4_YEAST	7	1RYPP|3BDMC|3BDMR	1RYPP|1RYPY|3BDMC|3BDMV	6/12	0/12
PSA5_YEAST	7	1G0US|1G0UZ|1VSY8	1G0US|1G0UZ|1VSY8|1Z7QU	1/12	0/12
PSA6_YEAST	7	1RYPP|1VSY4|1Z7QU|3BDMB	1G0U1|1RYPP|1VSY4|1Z7QU|3BDMC	3/15	0/15
PSA7_YEAST	7	1VSY8|3BDMB	1RYPK|1RYPL|1VSY8|3BDMB|3BDMR	3/15	6/15
PSB1_YEAST	7	1G0U1|1G0US	1G0U1|1G0UI|1G0US	0/9	0/9
PSB3_YEAST	7	1RYPB|1RYPY|3BDMP	1G0UZ|1RYPB|3BDMP	0/9	0/9
PSB4_YEAST	7	1G0US|1Z7QG	1G0UG|1G0US|1Z7QG	1/9	0/9
RPB2_YEAST	7	1TWFA|1TWFK|3CQZJ|3HOYC	1TWFA|1TWFK|3CQZF|3HOYC	1/12	0/12
PSB5_YEAST	7	1G0UI|1RYPY|3BDMH	1G0UI|3BDMC|3BDMH	0/9	0/9
PSB6_YEAST	7	1G0U1|1G0UU|1Z7QU|3BDMH	1G0U1|1Z7QU|3BDMH	5/9	0/9
PSB7_YEAST	7	1G0UM|1G0UZ|1RYPV	1G0UM|1G0UZ|1RYPP|3BDMP	3/12	0/12
QCR1_YEAST	7	3CX5D|3CX5N|3CX5P|3CX5R|3CX5S	3CX5D|3CX5N|3CX5P|3CX5S	0/12	0/12
QCR6_YEAST	7	3CX5D|3CX5H	3CX5D|3CX5H|3CX5I	0/9	0/9
QCR7_YEAST	7	3CX5C|3CX5M|3CX5S	3CX5C|3CX5D|3CX5M	3/9	0/9
QCR8_YEAST	7	3CX5C|3CX5D|3CX5L|3CX5P|3CX5R	3CX5C|3CX5D|3CX5P|3CX5R	6/12	0/12
QCR9_YEAST	7	3CX5D|3CX5E|3CX5L	3CX5D|3CX5E|3CX5L	2/9	0/9
RAN_HUMAN	7	1I2MB|1IBRD|1K5DK|1QBKB|1RRPB	1I2MB|1IBRD|1QBKB	2/9	0/9
RBX1_HUMAN	7	1U6GA|1U6GC|2HYEC|3DPLC	1U6GA|2HYEC|3DPLC	9/9	0/9
RFC1_YEAST	7	1SXJB|1SXJG	1SXJB|1SXJD|1SXJG	0/9	0/9
RFC2_YEAST	7	1SXJA|1SXJC|1SXJE	1SXJA|1SXJC|1SXJE	3/9	0/9
RFC3_YEAST	7	1SXJB|1SXJD|1SXJE	1SXJD|1SXJE|1SXJF	2/9	2/9
RFC4_YEAST	7	1SXJA|1SXJC|1SXJD|1SXJE	1SXJA|1SXJC|1SXJE	6/9	0/9
RHOA_HUMAN	7	1CXZB|1X86C|3KZ1A	1CXZB|1X86C|3KZ1A	0/9	0/9
RPAB1_YEAST	7	3CQZA|3CQZB|3CQZF	3CQZA|3CQZF|3GTMS	0/9	0/9
RPAB2_YEAST	7	3CQZA|3CQZB|3HOUG	3CQZA|3CQZB|3HOUD	0/9	0/9
RPAB3_YEAST	7	3CQZA|3CQZK	3CQZA|3CQZB|3CQZK	0/9	0/9
RPB11_YEAST	7	1TWFA|1TWFB|3CQZL|3HOYC	1TWFA|1TWFB|3CQZH	0/9	1/9
RPB1_YEAST	7	1TWFB|1TWFK|3CQZH|3HOYC	1TWFB|1TWFK|3CQZH|3HOUP	3/12	0/12
B2MG_HUMAN	8	1A1MA|1A9EA|1HSBA|1IM9E|1K5NA|1OGAA|1ONQC|1XR9A|2BVPA|2DYPA|2H26A|2H6PA|3BO8A|3BZFA|3D2UD|3HUJC|3KPMA|3M17C|3O4LA	1A1MA|1HSBA|1IM9E|1K5NA|1OGAA|1XR9A|2BVPA|2DYPA|2H6PA|3BO8A|3BZFA|3HUJC|3KPMA|3O4LA	42/42	0/42
B2MG_MOUSE	8	1BIIA|1CD1C|1K8DA|1LDPH|1S7QA|1S7UD	1BIIA|1CD1C|1K8DA|1LDPH|1S7QA|1S7UD	3/18	0/18
BLM10_YEAST	8	1VSYS|1VSYU|3L5QK	1VSYS|1VSYU|3L5QU	3/9	0/9
CDC42_HUMAN	8	1CEEB|1CF4B|1KI1D|2NGRB|2ODBB	1CF4B|1KI1D|2NGRB	5/9	0/9
CY1_YEAST	8	3CX5A|3CX5G|3CX5H|3CX5P	3CX5G|3CX5H|3CX5I|3CX5P	8/12	0/12
CYB_YEAST	8	3CX5D|3CX5E|3CX5H	3CX5D|3CX5E|3CX5H	7/9	0/9
EP300_HUMAN	8	1L3EA|1P4QA	1L3EA|1P4QA|2K8FB	6/9	3/9
STX1A_RAT	8	1SFCC|1SFCE|3C98A	1SFCC|1SFCE|3C98A	7/9	0/9
SUMO1_HUMAN	8	1WYWA|1Z5SD|2ASQB|2G4DA|2IO2A|2KQSB|2PE6A|3KYCA|3KYCB	2ASQB|2KQSB|2PE6A	6/9	0/9
SUS1_YEAST	8	3FWBA|3FWCN|3M99D|3MHSA|3MHSC	3FWCN|3M99D|3MHSC	3/9	0/9
TFS2_YEAST	8	1Y1VA|1Y1VB	1Y1VA|1Y1VB|3GTME	0/9	0/9
THRB_HUMAN	8	1JMOA|1NROR|2A45J|3GISZ	1JMOA|2A45J|2B5TI	0/9	0/9
UBIQ_HUMAN	8	1NBFA|1S1QC|1XD3A|2IBIA|2K6DA|2KDFA|2KHWA|3IFWA|3IHPB|3JW0C|3LDZC	1NBFA|2KDFA|3IHPB	3/9	0/9
UCRI_YEAST	8	3CX5I|3CX5L|3CX5O|3CX5S	3CX5I|3CX5O|3CX5S	6/9	0/9
RPB3_YEAST	8	1TWFB|1TWFK|3CQZJ|3CQZL	1TWFB|1TWFK|3CQZJ|3CQZL	8/12	0/12
PSA1_YEAST	8	1VSY5|1Z7QG|3BDMD|3BDMP	1G0UZ|3BDMD|3BDMP	0/9	1/9
PSA2_YEAST	8	3BDMP|3BDMQ|3BDMR	1G0UU|1VSY7|3BDMQ|3BDMR	0/12	1/12
PSA3_YEAST	8	1G0UG|1G0US|1VSY7|3BDMB	1G0U1|1G0UG|1G0US|1VSY7|3BDMB	1/15	0/15
PSA4_YEAST	8	1RYPP|3BDMC|3BDMR	1RYPP|1RYPY|3BDMR	0/9	3/9
PSA5_YEAST	8	1G0US|1RYPP|3BDMP|3BDMQ	1RYPP|1RYPZ|1VSY8|3BDMP	3/12	0/12
PSA6_YEAST	8	1RYPP|1VSY4|1Z7QU|3BDMB	1RYPP|1VSY4|3BDMD	3/9	0/9
PSA7_YEAST	8	1RYPP|3BDMB|3BDMR	1RYPK|3BDMB|3BDMR	1/9	0/9
PSB1_YEAST	8	1G0U1|1G0US	1G0U1|1G0US|3BDMV	6/9	3/9
PSB3_YEAST	8	1G0UZ|1RYPL|3BDMV	1G0UZ|1RYPB|1RYPL	0/9	3/9
PSB4_YEAST	8	1G0UZ|1RYPH|3BDMH	1G0US|1RYPH|3BDMH	3/9	0/9
RPB2_YEAST	8	1TWFA|1TWFK|3CQZJ|3HOYC	1TWFA|1TWFK|3CQZJ|3HOYC	10/12	0/12
PSB5_YEAST	8	1G0UI|1RYPY|3BDMH	1G0UI|3BDMH|3BDMR	3/9	0/9
PSB6_YEAST	8	1G0U1|1G0UU|1Z7QU|3BDMH	1G0UU|1G0UZ|1Z7QU	0/9	0/9
PSB7_YEAST	8	1G0UG|1G0UM|1RYPV	1G0UG|1G0UM|1RYPP	2/9	0/9
QCR1_YEAST	8	3CX5D|3CX5N|3CX5P|3CX5R|3CX5S	3CX5D|3CX5N|3CX5P|3CX5R	6/12	0/12
QCR6_YEAST	8	3CX5D|3CX5H	3CX5D|3CX5H|3CX5I	0/9	0/9
QCR7_YEAST	8	3CX5A|3CX5C|3CX5D|3CX5S	3CX5C|3CX5D|3CX5S	3/9	0/9
QCR8_YEAST	8	3CX5C|3CX5D|3CX5F	3CX5C|3CX5F|3CX5R	0/9	0/9
QCR9_YEAST	8	3CX5D|3CX5E|3CX5L	3CX5D|3CX5E|3CX5L	2/9	0/9
RAN_HUMAN	8	1I2MB|1IBRD|1K5DK|1QBKB|1RRPB	1I2MB|1IBRD|1K5DK|1QBKB	4/12	0/12
RBX1_HUMAN	8	1U6GA|1U6GC|2HYEC|3DPLC	1U6GA|1U6GC|2HYEC	0/9	0/9
RFC1_YEAST	8	1SXJB|1SXJC|1SXJD	1SXJC|1SXJD|1SXJE	0/9	0/9
RFC2_YEAST	8	1SXJA|1SXJC|1SXJE	1SXJA|1SXJC|1SXJF	4/9	0/9
RFC3_YEAST	8	1SXJB|1SXJD|1SXJE	1SXJD|1SXJE|1SXJF	3/9	0/9
RFC4_YEAST	8	1SXJA|1SXJC|1SXJD|1SXJE	1SXJA|1SXJC|1SXJG	7/9	0/9
RHOA_HUMAN	8	1CXZB|1X86C|3KZ1A	1CXZB|1X86C|3KZ1A	2/9	0/9
RPAB1_YEAST	8	3CQZA|3CQZB|3CQZF	3CQZA|3CQZB|3CQZF	0/9	0/9
RPAB2_YEAST	8	3CQZA|3CQZB|3CQZE	3CQZA|3CQZB|3CQZE	2/9	0/9
RPAB3_YEAST	8	3CQZA|3CQZK	3CQZA|3CQZK|3HOYC	0/9	0/9
RPB11_YEAST	8	1TWFA|1TWFB|3CQZL|3HOYC	1TWFA|1TWFB|3CQZH	0/9	0/9
RPB1_YEAST	8	1TWFB|1TWFK|3CQZH|3HOYC	1TWFB|3CQZH|3HOUP	3/9	3/9
B2MG_HUMAN	9	1A1MA|1A9EA|1HSBA|1IM9E|1K5NA|1OGAA|1ONQC|1XR9A|2BVPA|2DYPA|2H26A|2H6PA|3BO8A|3BZFA|3D2UD|3HUJC|3KPMA|3M17C|3O4LA	1HSBA|1IM9E|1OGAA|1ONQC|2DYPA|3BO8A|3BZFA|3HUJC|3M17C|3O4LA	22/30	0/30
B2MG_MOUSE	9	1BIIA|1CD1C|1K8DA|1LDPH|1S7QA|1S7UD	1K8DA	1/4	0/4
BLM10_YEAST	9	3L5QT|3L5QU	1VSYA|1VSYS|3L5QT	1/9	0/9
CY1_YEAST	9	3CX5A|3CX5G|3CX5H|3CX5P	3CX5A|3CX5G|3CX5I	0/9	3/9
CYB_YEAST	9	3CX5D|3CX5E|3CX5H	3CX5D|3CX5E|3CX5H	8/9	0/9
STX1A_RAT	9	1SFCC|1SFCE|3C98A	1SFCC|1SFCE|3C98A	7/9	0/9
SUMO1_HUMAN	9	1WYWA|1Z5SD|2ASQB|2G4DA|2IO2A|2KQSB|2PE6A|3KYCA|3KYCB	2ASQB|2KQSB|3KYCA	6/9	0/9
SUS1_YEAST	9	3FWBA|3FWCN|3M99D|3MHSA|3MHSC	3FWCN|3M99D|3MHSC	3/9	0/9
TFS2_YEAST	9	1Y1VA|1Y1VB	1Y1VA|1Y1VB|3GTME	0/9	0/9
THRB_HUMAN	9	1JMOA|1NROR|2A45J|3GISZ	1JMOA|2A45J|3GISZ	8/9	0/9
UBIQ_HUMAN	9	1NBFA|1S1QC|1XD3A|2IBIA|2K6DA|2KDFA|2KHWA|3IFWA|3IHPB|3JW0C|3LDZC	1NBFA|2KDFA|3IHPB	3/9	0/9
UCRI_YEAST	9	3CX5I|3CX5L|3CX5O|3CX5S	3CX5I|3CX5N|3CX5O|3CX5S	6/12	0/12
RPB3_YEAST	9	1TWFB|1TWFK|3CQZJ|3CQZL	1TWFB|3CQZH|3CQZL	0/9	0/9
PSA1_YEAST	9	1G0U1|1G0UZ	1G0U1|1G0UZ|3BDMC	0/9	0/9
PSA2_YEAST	9	1VSY7|3BDMP	1G0UE|1VSY7|3BDMP|3BDMR	0/12	0/12
PSA3_YEAST	9	1G0UG|1G0US|1VSY7|3BDMB	1G0UG|1RYPB|1VSY7|3BDMD	0/12	2/12
PSA4_YEAST	9	1RYPP|3BDMC|3BDMR	1RYPP|1VSY8|3BDMR|3BDMV	0/12	0/12
PSA5_YEAST	9	1G0US|1G0UZ|1VSY8	1G0US|1G0UZ|3BDMP	0/9	0/9
PSA6_YEAST	9	1RYPP|3BDMH	1G0U1|1RYPP|1VSY4|3BDMH	3/12	0/12
PSA7_YEAST	9	1VSY8|3BDMB	1RYPL|1VSY8|3BDMB|3BDMR	3/12	0/12
PSB1_YEAST	9	1G0UI|1RYPL|3BDMV	1G0UI|1RYPL|3BDMV	3/9	0/9
PSB3_YEAST	9	1G0UZ|1RYPL|3BDMV	1G0UZ|1RYPL|3BDMV	0/9	0/9
PSB4_YEAST	9	1G0UG|1RYPH|3BDMH	1G0UG|1G0US|3BDMH	3/9	3/9
RPB2_YEAST	9	1TWFA|2B8KG|3CQZF	1TWFA|2B8KG|3CQZE|3HOYC	3/12	1/12
PSB5_YEAST	9	1G0UI|1RYPY|3BDMH	1G0UI|3BDMH|3BDMR	0/9	0/9
PSB6_YEAST	9	1G0U1|1G0UU|1Z7QU|3BDMH	1G0UU|1G0UZ|1Z7QU	2/9	0/9
PSB7_YEAST	9	1G0UM|1G0UZ|1RYPV	1G0UG|1G0UI|1G0UZ|1RYPV	5/12	0/12
QCR1_YEAST	9	3CX5D|3CX5N|3CX5P|3CX5R|3CX5S	3CX5N|3CX5R|3CX5S	0/9	0/9
QCR6_YEAST	9	3CX5D|3CX5H	3CX5D|3CX5H|3CX5I	0/9	0/9
QCR7_YEAST	9	3CX5A|3CX5C|3CX5D|3CX5S	3CX5A|3CX5D|3CX5S	3/9	0/9
QCR8_YEAST	9	3CX5C|3CX5D|3CX5L|3CX5P|3CX5R	3CX5C|3CX5D|3CX5P	2/9	0/9
QCR9_YEAST	9	3CX5D|3CX5E|3CX5L	3CX5D|3CX5E|3CX5F	3/9	0/9
RAN_HUMAN	9	1I2MB|1IBRD|1K5DK|1QBKB|1RRPB	1IBRD|1K5DK|1QBKB	8/9	0/9
RBX1_HUMAN	9	1U6GA|1U6GC|2HYEC|3DPLC	1U6GA|1U6GC|2HYEC	2/9	0/9
RFC1_YEAST	9	1SXJB|1SXJC|1SXJD	1SXJC|1SXJD|1SXJG	1/9	3/9
RFC2_YEAST	9	1SXJB|1SXJC|1SXJE	1SXJB|1SXJC|1SXJF	0/9	0/9
RFC3_YEAST	9	1SXJB|1SXJD|1SXJE	1SXJD|1SXJE|1SXJF	3/9	0/9
RFC4_YEAST	9	1SXJA|1SXJC|1SXJD|1SXJE	1SXJC|1SXJD|1SXJE	2/9	0/9
RHOA_HUMAN	9	1OW3A|1S1CY|1X86C|3KZ1A	1OW3A|1X86C|3KZ1A	0/9	0/9
RPAB1_YEAST	9	3CQZA|3CQZB|3CQZF	3CQZA|3CQZF|3GTMS	1/9	0/9
RPAB2_YEAST	9	3CQZA|3CQZB|3HOUG	3CQZA|3CQZB|3HOUD	0/9	0/9
RPAB3_YEAST	9	3CQZA|3CQZK	3CQZA|3CQZB|3CQZK	0/9	0/9
RPB11_YEAST	9	1TWFA|1TWFB|3CQZL|3HOYC	1TWFA|1TWFB|3CQZH	0/9	0/9
RPB1_YEAST	9	1TWFB|3CQZE|3CQZF	1TWFB|1TWFI|3CQZE|3CQZH	1/12	3/12
B2MG_MOUSE	10	1BIIA|1CD1C|1K8DA|1LDPH|1S7QA|1S7UD	1BIIA|1K8DA|1LDPH|1S7QA|1S7UD	0/15	0/15
BLM10_YEAST	10	3L5QT|3L5QU	1VSYS|3L5QT|3L5QU	3/9	3/9
CY1_YEAST	10	3CX5A|3CX5G|3CX5H|3CX5P	3CX5A|3CX5G|3CX5I	0/9	3/9
CYB_YEAST	10	3CX5D|3CX5E|3CX5H	3CX5D|3CX5E|3CX5H	9/9	0/9
STX1A_RAT	10	1SFCC|1SFCE|3C98A	1SFCC|1SFCE|3C98A	6/9	0/9
SUMO1_HUMAN	10	1WYWA|1Z5SD|2ASQB|2G4DA|2IO2A|2KQSB|2PE6A|3KYCA|3KYCB	2ASQB|2KQSB|3KYCB	6/9	0/9
TFS2_YEAST	10	1Y1VA|1Y1VB	1Y1VA|1Y1VI|3GTME	0/9	0/9
THRB_HUMAN	10	1JMOA|1NROR|2A45J|3GISZ	1JMOA|2A45J|2B5TI	0/9	0/9
UBIQ_HUMAN	10	1NBFA|1S1QC|1XD3A|2IBIA|2K6DA|2KDFA|2KHWA|3IFWA|3IHPB|3JW0C|3LDZC	2KDFA|3IFWA|3IHPB	3/9	0/9
UCRI_YEAST	10	3CX5I|3CX5L|3CX5O|3CX5S	3CX5I|3CX5N|3CX5O|3CX5S	6/12	0/12
RPB3_YEAST	10	1TWFA|1TWFB|1TWFK	1TWFA|1TWFB|1TWFK	3/9	0/9
PSA1_YEAST	10	1G0U1|1G0UZ	1G0U1|1G0UZ|1RYPB	3/9	3/9
PSA2_YEAST	10	3BDMP|3BDMQ|3BDMR	1VSY7|3BDMP|3BDMQ|3BDMR	6/12	0/12
PSA3_YEAST	10	1G0UG|1G0US|1VSY7|3BDMB	1G0US|1VSY7|3BDMB|3BDMD	0/12	0/12
PSA4_YEAST	10	1RYPP|3BDMC|3BDMR	1RYPP|1VSY8|3BDMR|3BDMV	0/12	0/12
PSA5_YEAST	10	1G0US|1RYPP|3BDMP|3BDMQ	1G0UZ|3BDMP|3BDMQ	6/9	3/9
PSA6_YEAST	10	1RYPP|3BDMH	1G0U1|1RYPP|1VSY4|3BDMH	3/12	0/12
PSA7_YEAST	10	1RYPK|1RYPL	1RYPK|1RYPL|1VSY8	0/9	0/9
PSB1_YEAST	10	1G0UI|1RYPL|3BDMV	1G0UI|1RYPL|3BDMV	2/9	0/9
PSB3_YEAST	10	1G0UZ|1RYPL|3BDMV	1G0UZ|1RYPL|3BDMV	0/9	0/9
PSB4_YEAST	10	1G0US|1Z7QG	1G0US|1Z7QG|3BDMH	3/9	3/9
RPB2_YEAST	10	1TWFA|2B8KG|3CQZF	1TWFA|2B8KG|3CQZF|3HOUP	0/12	0/12
PSB5_YEAST	10	1G0UL|1RYPY|3BDMC	1G0UL|1RYPY|3BDMR	0/9	0/9
PSB7_YEAST	10	1G0UG|1G0UM|1RYPV	1G0UG|1RYPP|1RYPV|3BDMP	3/12	0/12
QCR1_YEAST	10	3CX5D|3CX5N|3CX5P|3CX5R|3CX5S	3CX5M|3CX5N|3CX5P|3CX5R	7/12	3/12
QCR6_YEAST	10	3CX5D|3CX5H	3CX5D|3CX5H|3CX5I	0/9	0/9
QCR7_YEAST	10	3CX5C|3CX5M|3CX5S	3CX5A|3CX5M|3CX5S	1/9	0/9
QCR8_YEAST	10	3CX5C|3CX5D|3CX5L|3CX5P|3CX5R	3CX5C|3CX5D|3CX5P	2/9	0/9
RAN_HUMAN	10	1I2MB|1IBRD|1K5DK|1QBKB|1RRPB	1IBRD|1K5DK|1QBKB	6/9	0/9
RBX1_HUMAN	10	1U6GA|1U6GC|2HYEC|3DPLC	1U6GA|2HYEC|3DPLC	1/9	0/9
RFC1_YEAST	10	1SXJB|1SXJG	1SXJD|1SXJE|1SXJG	0/9	0/9
RFC3_YEAST	10	1SXJB|1SXJD|1SXJE	1SXJD|1SXJE|1SXJF	3/9	2/9
RFC4_YEAST	10	1SXJA|1SXJC|1SXJD|1SXJE	1SXJC|1SXJD|1SXJG	4/9	2/9
RPAB2_YEAST	10	3CQZA|3CQZB|3HOUG	3CQZA|3CQZB|3HOUD	0/9	0/9
RPAB3_YEAST	10	3CQZA|3CQZK	3CQZA|3CQZB|3CQZK	0/9	3/9
RPB11_YEAST	10	1TWFA|1TWFB|3CQZL|3HOYC	1TWFA|3CQZL|3HOYC	3/9	0/9
RPB1_YEAST	10	1TWFB|3K7AM	1TWFB|3CQZE|3HOUP|3K7AM	3/12	3/12
B2MG_MOUSE	11	1BIIA|1CD1C|1K8DA|1LDPH|1S7QA|1S7UD	1BIIA|1K8DA|1S7UD	0/9	0/9
BLM10_YEAST	11	3L5QT|3L5QU	1VSYP|1VSYS|3L5QT|3L5QU	3/12	3/12
CY1_YEAST	11	3CX5A|3CX5G|3CX5H|3CX5P	3CX5A|3CX5G|3CX5W	0/9	0/9
CYB_YEAST	11	3CX5D|3CX5G|3CX5H|3CX5L	3CX5D|3CX5E|3CX5G	5/9	0/9
STX1A_RAT	11	1SFCC|1SFCE|3C98A	1SFCC|1SFCE|3C98A	6/9	0/9
SUMO1_HUMAN	11	1WYWA|1Z5SD|2ASQB|2G4DA|2IO2A|2KQSB|2PE6A|3KYCA|3KYCB	1WYWA|1Z5SD|2IO2A	0/9	0/9
TFS2_YEAST	11	1Y1VA|1Y1VB	1Y1VA|1Y1VB|1Y1VI	2/9	0/9
THRB_HUMAN	11	1JMOA|1NROR|2A45J|3GISZ	1JMOA|2B5TI|3GISZ	3/9	0/9
UBIQ_HUMAN	11	1NBFA|1S1QC|1XD3A|2IBIA|2K6DA|2KDFA|2KHWA|3IFWA|3IHPB|3JW0C|3LDZC	2K6DA|2KDFA|3IHPB	5/9	0/9
UCRI_YEAST	11	3CX5I|3CX5L|3CX5O|3CX5S	3CX5I|3CX5N|3CX5O|3CX5S	6/12	0/12
RPB3_YEAST	11	1TWFA|1TWFB|1TWFK	1TWFA|1TWFB|1TWFK	3/9	0/9
PSA1_YEAST	11	1G0UZ|1VSY5|3BDMD	1G0U1|1G0UZ|1VSY5|3BDMD	3/12	0/12
PSA2_YEAST	11	1G0UU|3BDMP|3BDMQ	1G0UE|1G0UU|3BDMQ	0/9	0/9
PSA3_YEAST	11	1G0U1|1G0UG|1RYPH	1G0U1|1G0UG|1G0US|1RYPH	1/12	3/12
PSA4_YEAST	11	1RYPY|3BDMC	1RYPY|3BDMC|3BDMV	0/9	0/9
PSA5_YEAST	11	1G0US|1RYPP|3BDMP|3BDMQ	1RYPP|1VSY8|3BDMP|3BDMQ	0/12	0/12
PSA6_YEAST	11	1RYPP|1VSY4|1Z7QU|3BDMB	1VSY4|3BDMB|3BDMD	0/9	3/9
PSA7_YEAST	11	1VSY8|3BDMB	1RYPK|1RYPL|1VSY8|3BDMB	1/12	0/12
PSB1_YEAST	11	1RYPL|3BDMD	1G0UI|1RYPL|3BDMD	6/9	0/9
PSB3_YEAST	11	1RYPB|1RYPY|3BDMP	1RYPB|1RYPY|3BDMP	1/9	0/9
PSB4_YEAST	11	1G0US|1Z7QG	1G0US|1Z7QG|3BDMH	6/9	0/9
RPB2_YEAST	11	1TWFA|1TWFI	1TWFA|1TWFI|3CQZL|3HOUP	3/12	5/12
PSB5_YEAST	11	1G0UL|1RYPY|3BDMC	1G0UL|1RYPY|3BDMC	1/9	0/9
PSB7_YEAST	11	1G0UM|1G0UZ|1RYPV	1G0UG|1G0UM|1G0UZ|3BDMP	5/12	0/12
QCR1_YEAST	11	3CX5D|3CX5N|3CX5P|3CX5R|3CX5S	3CX5D|3CX5N|3CX5P|3CX5R	3/12	0/12
QCR6_YEAST	11	3CX5D|3CX5H	3CX5D|3CX5H|3CX5I	0/9	0/9
QCR7_YEAST	11	3CX5C|3CX5M|3CX5S	3CX5A|3CX5C|3CX5M	2/9	0/9
QCR8_YEAST	11	3CX5C|3CX5D|3CX5L|3CX5P|3CX5R	3CX5C|3CX5D|3CX5P	2/9	0/9
RAN_HUMAN	11	1I2MB|1IBRD|1K5DK|1QBKB|1RRPB	1IBRD|1K5DK|1QBKB	3/9	0/9
RBX1_HUMAN	11	1U6GA|1U6GC|2HYEC|3DPLC	1U6GC|2HYEC|3DPLC	0/9	0/9
RFC1_YEAST	11	1SXJB|1SXJG	1SXJD|1SXJE|1SXJG	0/9	0/9
RFC4_YEAST	11	1SXJA|1SXJC|1SXJD|1SXJE	1SXJD|1SXJE|1SXJG	0/9	3/9
RPAB2_YEAST	11	3CQZA|3CQZB|3HOUG	3CQZA|3CQZB|3HOUD	0/9	0/9
RPAB3_YEAST	11	3CQZA|3CQZK	3CQZA|3CQZB|3CQZK	0/9	0/9
RPB11_YEAST	11	1TWFA|1TWFB|3CQZL|3HOYC	1TWFA|3CQZH|3CQZL	0/9	2/9
RPB1_YEAST	11	1TWFB|3CQZE|3CQZF	1TWFB|3CQZF|3CQZH	3/9	2/9
B2MG_MOUSE	12	1BIIA|1CD1C|1K8DA|1LDPH|1S7QA|1S7UD	1BIIA|1K8DA|1LDPH|1S7QA|1S7UD	1/15	0/15
BLM10_YEAST	12	1VSYA|1VSYP	1VSYA|1VSYP|1VSYS|3L5QT	0/12	3/12
CY1_YEAST	12	3CX5A|3CX5G|3CX5H|3CX5P	3CX5A|3CX5H|3CX5P	3/9	0/9
CYB_YEAST	12	3CX5D|3CX5G|3CX5H|3CX5L	3CX5D|3CX5E|3CX5G	3/9	0/9
STX1A_RAT	12	1SFCC|1SFCE|3C98A	1SFCC|1SFCE|3C98A	7/9	0/9
SUMO1_HUMAN	12	1WYWA|1Z5SD|2ASQB|2G4DA|2IO2A|2KQSB|2PE6A|3KYCA|3KYCB	1WYWA|1Z5SD|3KYCB	3/9	0/9
TFS2_YEAST	12	1Y1VA|1Y1VB	1Y1VA|1Y1VI|3GTME	0/9	0/9
THRB_HUMAN	12	1JMOA|1NROR|2A45J|3GISZ	1JMOA|2B5TI|3GISZ	5/9	0/9
UBIQ_HUMAN	12	1NBFA|1S1QC|1XD3A|2IBIA|2K6DA|2KDFA|2KHWA|3IFWA|3IHPB|3JW0C|3LDZC	2KDFA|3IFWA|3IHPB|3LDZC	8/12	0/12
UCRI_YEAST	12	3CX5I|3CX5N|3CX5O	3CX5I|3CX5N|3CX5O	6/9	0/9
RPB3_YEAST	12	1TWFA|1TWFB|1TWFK	1TWFA|1TWFB|1TWFK	3/9	0/9
PSA1_YEAST	12	1VSY5|1Z7QG|3BDMD|3BDMP	1G0U1|1G0UZ|1Z7QG|3BDMP	1/12	0/12
PSA2_YEAST	12	1G0UU|3BDMV	1G0UE|1G0UU|1VSY7|3BDMV	3/12	0/12
PSA3_YEAST	12	1G0U1|1G0UG|1RYPH	1G0U1|1RYPB|1RYPH|1VSY7	3/12	0/12
PSA4_YEAST	12	1RYPP|1VSY8	1G0UI|1RYPP|1VSY8	1/9	0/9
PSA5_YEAST	12	1G0UZ|1RYPZ	1RYPZ|1VSY8|3BDMP	0/9	0/9
PSA6_YEAST	12	1RYPP|1VSY4|1Z7QU|3BDMB	1VSY4|3BDMB|3BDMC|3BDMD	5/12	0/12
PSA7_YEAST	12	1RYPP|3BDMB|3BDMR	1RYPK|1RYPP|3BDMB	0/9	0/9
PSB1_YEAST	12	1RYPL|3BDMD	1G0UI|1RYPV|3BDMD	0/9	3/9
PSB3_YEAST	12	1RYPB|1RYPY|3BDMP	1RYPL|1RYPY|3BDMP	0/9	0/9
PSB4_YEAST	12	1G0UG|1RYPH|3BDMH	1G0UG|1G0US|3BDMH	0/9	0/9
RPB2_YEAST	12	1TWFK|3CQZJ|3CQZL|3HOYC	1TWFI|3CQZE|3CQZH|3CQZL|3HOYC	1/15	5/15
PSB5_YEAST	12	1G0UL|1RYPY|3BDMC	1G0UL|1RYPY|3BDMC	2/9	0/9
PSB7_YEAST	12	1G0UI|3BDMP	1G0UI|1RYPL|3BDMP	3/9	0/9
QCR1_YEAST	12	3CX5D|3CX5N|3CX5P|3CX5R|3CX5S	3CX5N|3CX5P|3CX5R|3CX5S	3/12	0/12
QCR6_YEAST	12	3CX5D|3CX5H	3CX5D|3CX5H|3CX5I	0/9	0/9
QCR7_YEAST	12	3CX5C|3CX5M|3CX5S	3CX5A|3CX5M|3CX5S	0/9	0/9
QCR8_YEAST	12	3CX5C|3CX5D|3CX5L|3CX5P|3CX5R	3CX5C|3CX5D|3CX5P	1/9	0/9
RAN_HUMAN	12	1I2MB|1IBRD|1K5DK|1QBKB|1RRPB	1IBRD|1K5DK|1RRPB	6/9	0/9
RBX1_HUMAN	12	1U6GA|1U6GC|2HYEC|3DPLC	1U6GA|1U6GC|2HYEC	0/9	0/9
RFC4_YEAST	12	1SXJA|1SXJC|1SXJD|1SXJE	1SXJD|1SXJE|1SXJG	0/9	3/9
RPAB2_YEAST	12	3CQZA|3CQZB|3HOUG	3CQZA|3CQZB|3HOUD	0/9	0/9
RPAB3_YEAST	12	3CQZA|3CQZK	3CQZA|3CQZB|3CQZK	0/9	0/9
RPB11_YEAST	12	1TWFA|1TWFB|3CQZL|3HOYC	1TWFA|3CQZH|3HOYC	3/9	0/9
RPB1_YEAST	12	1TWFB|3CQZE|3CQZF	1TWFB|1TWFI|3CQZF|3CQZH	6/12	6/12
B2MG_MOUSE	13	1BIIA|1CD1C|1K8DA|1LDPH|1S7QA|1S7UD	1BIIA	0/4	0/4
BLM10_YEAST	13	3L5QT|3L5QU	1VSYP|1VSYS|3L5QT|3L5QU	2/12	1/12
CY1_YEAST	13	3CX5A|3CX5C|3CX5G|3CX5H|3CX5P	3CX5C|3CX5G|3CX5H	5/9	0/9
CYB_YEAST	13	3CX5D|3CX5G|3CX5H|3CX5L	3CX5D|3CX5E|3CX5L	0/9	0/9
STX1A_RAT	13	1SFCC|1SFCE|3C98A	1SFCC|1SFCE|3C98A	6/9	0/9
SUMO1_HUMAN	13	1WYWA|1Z5SD|2ASQB|2G4DA|2IO2A|2KQSB|2PE6A|3KYCA|3KYCB	1WYWA|1Z5SD|3KYCB	3/9	0/9
TFS2_YEAST	13	1Y1VA|1Y1VB	1Y1VA|1Y1VB|1Y1VI	3/9	0/9
THRB_HUMAN	13	1JMOA|1NROR|2A45J|3GISZ	1NROR|2A45J|3GISZ	8/9	0/9
UBIQ_HUMAN	13	1NBFA|1S1QC|1XD3A|2IBIA|2K6DA|2KDFA|2KHWA|3IFWA|3IHPB|3JW0C|3LDZC	1NBFA|2K6DA|3LDZC	5/9	0/9
UCRI_YEAST	13	3CX5N|3CX5O|3CX5S	3CX5N|3CX5O|3CX5S	2/9	0/9
RPB3_YEAST	13	1TWFA|1TWFB|1TWFK	1TWFA|1TWFB|1TWFK	3/9	0/9
PSA1_YEAST	13	1G0U1|1Z7QG	1G0U1|1Z7QG|3BDMC	0/9	0/9
PSA2_YEAST	13	1VSY7|3BDMP	1G0UE|1G0UW|1VSY7|3BDMP	3/12	0/12
PSA3_YEAST	13	1G0UG|1G0US|1VSY7|3BDMB	1G0U1|1VSY7|3BDMB	0/9	0/9
PSA4_YEAST	13	1RYPP|3BDMC|3BDMR	1G0UI|1RYPP|1VSY8|3BDMR	0/12	0/12
PSA5_YEAST	13	1G0US|1G0UZ|1VSY8	1G0US|1RYPP|1VSY8	3/9	0/9
PSA6_YEAST	13	1G0U1|1RYPH|3BDMH	1G0U1|1RYPH|3BDMB	0/9	0/9
PSA7_YEAST	13	1RYPP|3BDMB|3BDMR	1RYPK|1RYPP|3BDMB|3BDMR	3/12	3/12
PSB1_YEAST	13	1G0UI|1RYPL|3BDMV	1RYPL|1RYPV|3BDMV	2/9	0/9
PSB3_YEAST	13	1RYPB|1RYPY|3BDMP	1RYPL|1RYPY|3BDMP	0/9	3/9
PSB4_YEAST	13	1G0UG|1RYPH|3BDMH	1G0UG|1G0US|3BDMH	0/9	0/9
RPB2_YEAST	13	1TWFA|1TWFK|3CQZJ|3HOYC	1TWFA|1TWFK|3HOYC	5/9	0/9
PSB5_YEAST	13	1G0UI|1RYPY|3BDMH	1RYPY|3BDMC|3BDMH	5/9	0/9
PSB7_YEAST	13	1G0UI|3BDMP	1G0UI|1RYPP|3BDMP	3/9	0/9
QCR1_YEAST	13	3CX5D|3CX5P|3CX5S|3CX5T	3CX5D|3CX5P|3CX5T	3/12	0/12
QCR6_YEAST	13	3CX5D|3CX5H	3CX5D|3CX5H|3CX5I	0/9	0/9
QCR7_YEAST	13	3CX5A|3CX5C|3CX5D|3CX5S	3CX5C|3CX5D|3CX5S	5/9	0/9
QCR8_YEAST	13	3CX5C|3CX5D|3CX5L|3CX5P|3CX5R	3CX5C|3CX5D|3CX5P	2/9	0/9
RAN_HUMAN	13	1I2MB|1IBRD|1K5DK|1QBKB|1RRPB	1I2MB|1IBRD|1QBKB	0/9	0/9
RBX1_HUMAN	13	1U6GA|1U6GC|2HYEC|3DPLC	1U6GA|1U6GC|2HYEC	4/9	0/9
RPAB2_YEAST	13	3CQZA|3CQZE|3HOUG	3CQZA|3CQZE|3HOUD	0/9	0/9
RPAB3_YEAST	13	3CQZA|3CQZK	3CQZA|3CQZB|3CQZK	0/9	0/9
RPB11_YEAST	13	1TWFA|1TWFB|3CQZL|3HOYC	1TWFA|1TWFB|3CQZL	0/9	0/9
RPB1_YEAST	13	3HOUP|3K7AM	1TWFI|3CQZH|3HOUP|3K7AM	3/12	3/12
B2MG_MOUSE	14	1BIIA|1CD1C|1K8DA|1LDPH|1S7QA|1S7UD	1BIIA|1CD1C|1K8DA|1LDPH|1S7UD	0/15	0/15
BLM10_YEAST	14	3L5QT|3L5QU	1VSYS|3L5QT|3L5QU	2/9	0/9
CY1_YEAST	14	3CX5A|3CX5C|3CX5H|3CX5I|3CX5P	3CX5C|3CX5G|3CX5H|3CX5I	5/12	0/12
CYB_YEAST	14	3CX5D|3CX5E|3CX5H	3CX5D|3CX5E|3CX5H	9/9	0/9
STX1A_RAT	14	1SFCC|1SFCE|3C98A	1SFCC|1SFCE|3C98A	6/9	0/9
SUMO1_HUMAN	14	1WYWA|1Z5SD|2ASQB|2G4DA|2IO2A|2KQSB|2PE6A|3KYCA|3KYCB	1WYWA|1Z5SD|3KYCB	3/9	0/9
TFS2_YEAST	14	1Y1VA|1Y1VB	1Y1VA|1Y1VB|1Y1VI	1/9	0/9
THRB_HUMAN	14	1JMOA|1NROR|2A45J|3GISZ	1P8VA|2B5TI|3GISZ	2/9	2/9
UBIQ_HUMAN	14	1NBFA|1S1QC|1XD3A|2IBIA|2K6DA|2KDFA|2KHWA|3IFWA|3IHPB|3JW0C|3LDZC	1NBFA|2K6DA|2KDFA	3/9	0/9
UCRI_YEAST	14	3CX5I|3CX5L|3CX5O|3CX5S	3CX5I|3CX5N|3CX5S	6/9	0/9
RPB3_YEAST	14	1TWFA|1TWFB|1TWFK	1TWFA|1TWFK|3CQZJ	5/9	0/9
PSA1_YEAST	14	1VSY5|1Z7QG|3BDMD|3BDMP	1RYPB|1VSY5|3BDMD|3BDMP	0/12	0/12
PSA2_YEAST	14	3BDMP|3BDMQ|3BDMR	1G0UE|3BDMP|3BDMR|3BDMV	6/12	1/12
PSA3_YEAST	14	1G0UG|1G0US|1RYPB|3BDMB	1G0UG|1RYPB|1RYPH|3BDMD	0/12	0/12
PSA4_YEAST	14	1VSY8|3BDMC	1RYPP|1VSY8|3BDMC	3/9	3/9
PSA5_YEAST	14	1G0US|1RYPP|3BDMP|3BDMQ	1G0US|1RYPZ|3BDMP	1/9	0/9
PSA6_YEAST	14	1RYPP|1VSY4|1Z7QU|3BDMB	1G0U1|1VSY4|1Z7QU|3BDMC	3/12	0/12
PSA7_YEAST	14	1RYPP|3BDMB|3BDMR	1RYPK|1RYPP|3BDMB|3BDMR	3/12	3/12
PSB1_YEAST	14	1RYPL|3BDMD	1RYPV|3BDMD|3BDMV	0/9	0/9
PSB4_YEAST	14	1G0US|1G0UZ	1G0UG|1G0UZ|1Z7QG	2/9	0/9
RPB2_YEAST	14	1TWFA|1TWFK|3CQZJ|3HOYC	1TWFA|1TWFK|3CQZJ|3HOYC	10/12	0/12
PSB7_YEAST	14	1G0UM|1G0UZ|1RYPV	1G0UM|1G0UZ|3BDMP	3/9	0/9
QCR1_YEAST	14	3CX5D|3CX5N|3CX5P|3CX5R|3CX5S	3CX5D|3CX5N|3CX5P|3CX5R|3CX5S|3CX5T	5/18	0/18
QCR6_YEAST	14	3CX5D|3CX5H	3CX5D|3CX5H|3CX5I	1/9	0/9
QCR7_YEAST	14	3CX5A|3CX5C|3CX5D|3CX5S	3CX5C|3CX5D|3CX5S	5/9	0/9
QCR8_YEAST	14	3CX5C|3CX5D|3CX5L|3CX5P|3CX5R	3CX5C|3CX5D|3CX5P	2/9	0/9
RAN_HUMAN	14	1I2MB|1IBRD|1K5DK|1QBKB|1RRPB	1I2MB|1IBRD|1K5DK	6/9	0/9
RBX1_HUMAN	14	1U6GA|1U6GC|2HYEC|3DPLC	1U6GA|1U6GC|2HYEC	4/9	0/9
RPAB2_YEAST	14	3CQZA|3CQZE|3HOUG	3CQZA|3CQZE|3HOUD	3/9	0/9
RPAB3_YEAST	14	3CQZA|3CQZK	3CQZA|3CQZB|3CQZK	0/9	0/9
RPB11_YEAST	14	1TWFA|1TWFB|3CQZL|3HOYC	1TWFA|1TWFB|3CQZH	0/9	2/9
RPB1_YEAST	14	1TWFB|3CQZE|3CQZF	2B8KG|3CQZE|3HOYC	0/9	3/9
B2MG_MOUSE	15	1BIIA|1CD1C|1K8DA|1LDPH|1S7QA|1S7UD	1BIIA|1K8DA|1LDPH|1S7UD	0/12	0/12
BLM10_YEAST	15	3L5QT|3L5QU	1VSYS|3L5QT|3L5QU	1/9	1/9
CY1_YEAST	15	3CX5A|3CX5C|3CX5H|3CX5I|3CX5P	3CX5C|3CX5G|3CX5H|3CX5I|3CX5P	9/15	0/15
CYB_YEAST	15	3CX5D|3CX5E|3CX5H	3CX5D|3CX5E|3CX5H	9/9	0/9
STX1A_RAT	15	1SFCC|1SFCE|3C98A	1SFCC|1SFCE|3C98A	6/9	0/9
SUMO1_HUMAN	15	1WYWA|1Z5SD|2ASQB|2G4DA|2IO2A|2KQSB|2PE6A|3KYCA|3KYCB	1WYWA|2IO2A|3KYCB	3/9	0/9
TFS2_YEAST	15	1Y1VA|1Y1VB	1Y1VA|1Y1VI|3GTME	0/9	2/9
THRB_HUMAN	15	1JMOA|1NROR|2A45J|3GISZ	1P8VA|2B5TI|3GISZ	2/9	2/9
UBIQ_HUMAN	15	1NBFA|1S1QC|1XD3A|2IBIA|2K6DA|2KDFA|2KHWA|3IFWA|3IHPB|3JW0C|3LDZC	1NBFA|1XD3A|3IFWA|3JW0C	0/12	0/12
UCRI_YEAST	15	3CX5I|3CX5L|3CX5O|3CX5S	3CX5I|3CX5L|3CX5S	3/9	0/9
RPB3_YEAST	15	1TWFA|1TWFB|3CQZH	1TWFA|1TWFB|3CQZH	0/9	0/9
PSA1_YEAST	15	1VSY5|1Z7QG|3BDMD|3BDMP	1RYPB|1VSY5|3BDMC|3BDMP	0/12	0/12
PSA2_YEAST	15	3BDMP|3BDMQ|3BDMR	1G0UE|3BDMQ|3BDMR	0/9	0/9
PSA3_YEAST	15	1G0UG|1G0US|1VSY7|3BDMB	1G0UG|1RYPH|1VSY7|3BDMB	1/12	0/12
PSA4_YEAST	15	1RYPP|1VSY8	1RYPP|1VSY8|3BDMV	3/9	0/9
PSA5_YEAST	15	1G0US|1G0UZ|1VSY8	1G0US|1G0UZ|1RYPZ|1VSY8	0/12	0/12
PSA6_YEAST	15	1RYPP|1VSY4|1Z7QU|3BDMB	1G0U1|1VSY4|1Z7QU|3BDMC	3/12	0/12
PSA7_YEAST	15	1RYPK|1RYPL	1RYPK|1RYPL|1VSY8	3/9	0/9
PSB4_YEAST	15	1G0US|1G0UZ	1G0UG|1G0US|1G0UZ	0/9	2/9
RPB2_YEAST	15	1TWFK|3CQZJ|3CQZL|3HOYC	1TWFA|3CQZL|3HOYC	4/9	0/9
PSB7_YEAST	15	1G0UM|1G0UZ|1RYPV	1G0UM|1RYPV|3BDMP	3/9	0/9
QCR1_YEAST	15	3CX5D|3CX5P|3CX5S|3CX5T	3CX5D|3CX5P|3CX5S|3CX5T	0/12	0/12
QCR6_YEAST	15	3CX5D|3CX5H	3CX5D|3CX5H|3CX5I	0/9	0/9
QCR7_YEAST	15	3CX5A|3CX5C|3CX5D|3CX5S	3CX5C|3CX5D|3CX5S	6/9	0/9
QCR8_YEAST	15	3CX5C|3CX5D|3CX5L|3CX5P|3CX5R	3CX5D|3CX5L|3CX5P	6/9	0/9
RAN_HUMAN	15	1I2MB|1IBRD|1K5DK|1QBKB|1RRPB	1IBRD|1K5DK|1RRPB	4/9	0/9
RBX1_HUMAN	15	1U6GA|1U6GC|2HYEC|3DPLC	1U6GA|1U6GC|2HYEC	2/9	0/9
RPAB2_YEAST	15	3CQZA|3CQZB|3HOUG	3CQZA|3CQZB|3HOUD	0/9	0/9
RPAB3_YEAST	15	3CQZA|3CQZK	3CQZA|3CQZB|3CQZK	0/9	0/9
RPB11_YEAST	15	1TWFA|1TWFB|3CQZL|3HOYC	1TWFA|1TWFB|3CQZH	0/9	1/9
RPB1_YEAST	15	1TWFB|2B8KG|3CQZF|3HOUP	2B8KG|3CQZF|3HOUP	3/9	0/9
B2MG_MOUSE	16	1BIIA|1CD1C|1K8DA|1LDPH|1S7QA|1S7UD	1BIIA|1K8DA|1S7QA|1S7UD	0/12	0/12
BLM10_YEAST	16	1VSYA|1VSYU	1VSYA|1VSYU|3L5QK	0/9	0/9
CY1_YEAST	16	3CX5A|3CX5C|3CX5H|3CX5I|3CX5P	3CX5C|3CX5H|3CX5I|3CX5P	7/12	0/12
CYB_YEAST	16	3CX5D|3CX5E|3CX5H	3CX5D|3CX5E|3CX5H	9/9	0/9
STX1A_RAT	16	1SFCC|1SFCE|3C98A	1SFCC|1SFCE|3C98A	6/9	0/9
SUMO1_HUMAN	16	1WYWA|1Z5SD|2ASQB|2G4DA|2IO2A|2KQSB|2PE6A|3KYCA|3KYCB	1WYWA|2PE6A|3KYCA	4/9	0/9
THRB_HUMAN	16	1JMOA|1NROR|2A45J|3GISZ	1P8VA|2B5TI|3GISZ	2/9	0/9
UBIQ_HUMAN	16	1NBFA|1S1QC|1XD3A|2IBIA|2K6DA|2KDFA|2KHWA|3IFWA|3IHPB|3JW0C|3LDZC	1NBFA|3IHPB|3JW0C|3LDZC	5/12	0/12
UCRI_YEAST	16	3CX5I|3CX5L|3CX5O|3CX5S	3CX5I|3CX5O|3CX5S	6/9	0/9
RPB3_YEAST	16	1TWFA|1TWFB|3CQZH	1TWFA|1TWFB|3CQZH	0/9	0/9
PSA1_YEAST	16	1VSY5|1Z7QG|3BDMD|3BDMP	3BDMC|3BDMD|3BDMP	6/9	0/9
PSA2_YEAST	16	1VSY7|3BDMP	1G0UU|1G0UW|1VSY7|3BDMP	0/12	1/12
PSA3_YEAST	16	1G0UG|1G0US|1VSY7|3BDMB	1G0UG|1VSY7|3BDMD	0/9	0/9
PSA4_YEAST	16	1RYPP|3BDMC|3BDMR	1RYPP|1VSY8|3BDMR	0/9	0/9
PSA5_YEAST	16	1G0US|1G0UZ|1VSY8	1G0US|1G0UZ|1VSY8	0/9	0/9
PSA6_YEAST	16	1RYPP|1VSY4|1Z7QU|3BDMB	1G0U1|1VSY4|3BDMB|3BDMC	4/12	0/12
PSA7_YEAST	16	1VSY8|3BDMB	1RYPK|1RYPP|1VSY8	0/9	0/9
PSB4_YEAST	16	1G0UZ|1RYPH|3BDMH	1G0UG|1G0UZ|1RYPH	4/9	3/9
RPB2_YEAST	16	1TWFA|2B8KG|3HOUP	1TWFA|3HOUP|3HOYC	0/9	1/9
PSB7_YEAST	16	1G0UM|1G0UZ|1RYPV	1G0UZ|1RYPP|3BDMP	3/9	0/9
QCR1_YEAST	16	3CX5D|3CX5P|3CX5S|3CX5T	3CX5D|3CX5M|3CX5P|3CX5S|3CX5T	7/15	3/15
QCR6_YEAST	16	3CX5D|3CX5H	3CX5D|3CX5H|3CX5I	0/9	0/9
QCR7_YEAST	16	3CX5A|3CX5C|3CX5D|3CX5S	3CX5C|3CX5D|3CX5S	2/9	0/9
QCR8_YEAST	16	3CX5C|3CX5D|3CX5L|3CX5P|3CX5R	3CX5L|3CX5P|3CX5R	3/9	0/9
RAN_HUMAN	16	1I2MB|1IBRD|1K5DK|1QBKB|1RRPB	1IBRD|1K5DK|1RRPB	4/9	0/9
RBX1_HUMAN	16	1U6GA|1U6GC|2HYEC|3DPLC	1U6GA|1U6GC|2HYEC	3/9	0/9
RPAB2_YEAST	16	3CQZA|3CQZE|3HOUG	3CQZA|3HOUD|3HOUG	0/9	0/9
RPAB3_YEAST	16	3CQZA|3CQZK	3CQZA|3CQZB|3CQZK	0/9	0/9
RPB11_YEAST	16	1TWFA|1TWFB|3CQZL|3HOYC	1TWFA|1TWFB|3CQZH	0/9	0/9
RPB1_YEAST	16	1TWFB|1TWFK|3CQZH|3HOYC	1TWFB|1TWFK|2B8KG	2/9	0/9
B2MG_MOUSE	17	1BIIA|1CD1C|1K8DA|1LDPH|1S7QA|1S7UD	1BIIA|1K8DA|1S7QA|1S7UD	0/12	0/12
BLM10_YEAST	17	1VSYA|1VSYU	1VSYA|1VSYP|1VSYU	3/9	0/9
CY1_YEAST	17	3CX5C|3CX5F|3CX5H|3CX5P	3CX5C|3CX5F|3CX5I|3CX5P	6/12	3/12
CYB_YEAST	17	3CX5D|3CX5E|3CX5H	3CX5D|3CX5E|3CX5H	8/9	0/9
STX1A_RAT	17	1SFCC|1SFCE|3C98A	1SFCC|1SFCE|3C98A	8/9	0/9
SUMO1_HUMAN	17	1WYWA|1Z5SD|2ASQB|2G4DA|2IO2A|2KQSB|2PE6A|3KYCA|3KYCB	1WYWA|1Z5SD|3KYCA	4/9	0/9
UBIQ_HUMAN	17	1NBFA|1S1QC|1XD3A|2IBIA|2K6DA|2KDFA|2KHWA|3IFWA|3IHPB|3JW0C|3LDZC	1S1QC|2IBIA|3LDZC	4/9	0/9
UCRI_YEAST	17	3CX5I|3CX5L|3CX5O|3CX5S	3CX5I|3CX5O|3CX5S	6/9	0/9
RPB3_YEAST	17	1TWFA|1TWFB|3CQZH	1TWFA|1TWFB|3CQZH	0/9	0/9
PSA1_YEAST	17	1VSY5|1Z7QG|3BDMD|3BDMP	1RYPB|1VSY5|3BDMC	3/9	3/9
PSA2_YEAST	17	1G0UW|3BDMP	1G0UU|1G0UW|3BDMP|3BDMR	0/12	0/12
PSA3_YEAST	17	1G0UG|1G0US|1VSY7|3BDMB	1G0UG|1RYPB|1VSY7|3BDMB	0/12	0/12
PSA4_YEAST	17	1VSY8|3BDMC	1RYPP|1VSY8|3BDMC	0/9	0/9
PSA5_YEAST	17	1G0US|1G0UZ|1VSY8	1G0US|1G0UZ|1RYPZ|1VSY8	0/12	0/12
PSA6_YEAST	17	1RYPP|1VSY4|1Z7QU|3BDMB	1G0U1|1VSY4|3BDMB|3BDMC	0/12	0/12
PSA7_YEAST	17	1VSY8|3BDMB	1RYPK|1RYPP|1VSY8	3/9	0/9
PSB4_YEAST	17	1G0US|1G0UZ	1G0UG|1G0UZ|1Z7QG	3/9	3/9
RPB2_YEAST	17	1TWFA|2B8KG|3HOUP	1TWFA|3HOUP|3HOYC	0/9	2/9
PSB7_YEAST	17	1G0UM|1G0UZ|1RYPV	1G0UI|1G0UZ|1RYPV	2/9	0/9
QCR1_YEAST	17	3CX5M|3CX5R	3CX5D|3CX5M|3CX5R	0/9	2/9
QCR6_YEAST	17	3CX5D|3CX5H	3CX5D|3CX5H|3CX5I	0/9	0/9
QCR7_YEAST	17	3CX5A|3CX5C|3CX5D|3CX5S	3CX5C|3CX5D|3CX5S	2/9	0/9
QCR8_YEAST	17	3CX5C|3CX5D|3CX5L|3CX5P|3CX5R	3CX5C|3CX5P|3CX5R	6/9	0/9
RAN_HUMAN	17	1I2MB|1IBRD|1K5DK|1QBKB|1RRPB	1IBRD|1K5DK|1QBKB	3/9	0/9
RBX1_HUMAN	17	1U6GA|1U6GC|2HYEC|3DPLC	1U6GA|1U6GC|2HYEC	3/9	0/9
RPAB2_YEAST	17	3CQZA|3CQZB|3HOUG	3CQZA|3CQZB|3HOUD	0/9	0/9
RPAB3_YEAST	17	3CQZA|3CQZK	3CQZA|3CQZB|3CQZK	0/9	0/9
RPB11_YEAST	17	1TWFA|1TWFB|3CQZL|3HOYC	1TWFA|1TWFB|3CQZH	0/9	3/9
RPB1_YEAST	17	1TWFB|1TWFK|3CQZH|3HOYC	1TWFB|1TWFI|1TWFK	4/9	3/9
B2MG_MOUSE	18	1BIIA|1CD1C|1K8DA|1LDPH|1S7QA|1S7UD	1BIIA|1K8DA|1LDPH|1S7UD	16/16	0/16
BLM10_YEAST	18	1VSYA|1VSYP	1VSYA|1VSYP|3L5QT	1/9	1/9
CY1_YEAST	18	3CX5C|3CX5F|3CX5H|3CX5P	3CX5C|3CX5F|3CX5G	3/9	0/9
CYB_YEAST	18	3CX5D|3CX5E|3CX5H	3CX5D|3CX5E|3CX5H	9/9	0/9
STX1A_RAT	18	1SFCC|1SFCE|3C98A	1SFCC|1SFCE|3C98A	8/9	0/9
SUMO1_HUMAN	18	1WYWA|1Z5SD|2ASQB|2G4DA|2IO2A|2KQSB|2PE6A|3KYCA|3KYCB	1WYWA|1Z5SD|3KYCA	4/9	0/9
UBIQ_HUMAN	18	1NBFA|1S1QC|1XD3A|2IBIA|2K6DA|2KDFA|2KHWA|3IFWA|3IHPB|3JW0C|3LDZC	1S1QC|2KHWA|3LDZC	6/9	0/9
UCRI_YEAST	18	3CX5I|3CX5N|3CX5O	3CX5I|3CX5N|3CX5O	7/9	0/9
RPB3_YEAST	18	1TWFA|1TWFB|3CQZH	1TWFA|1TWFB|3CQZH	0/9	0/9
PSA1_YEAST	18	1VSY5|1Z7QG|3BDMD|3BDMP	1RYPB|1VSY5|3BDMC	0/9	0/9
PSA2_YEAST	18	1G0UU|3BDMP|3BDMQ	1G0UU|1G0UW|1VSY7|3BDMQ	0/12	0/12
PSA3_YEAST	18	1G0UG|1G0US|1VSY7|3BDMB	1G0UG|1RYPB|1VSY7	0/9	0/9
PSA4_YEAST	18	1VSY8|3BDMC	1RYPP|1VSY8|3BDMC|3BDMV	3/12	3/12
PSA5_YEAST	18	1G0UZ|1RYPZ	1G0UZ|1RYPZ|1VSY8|1Z7QU	0/12	0/12
PSA6_YEAST	18	1RYPP|3BDMH	1RYPP|1VSY4|3BDMH	3/9	0/9
PSA7_YEAST	18	1RYPK|1RYPL	1RYPK|1RYPL|1VSY8	3/9	0/9
PSB4_YEAST	18	1G0UZ|1RYPH|3BDMH	1G0UZ|1RYPH|3BDMH	5/9	0/9
RPB2_YEAST	18	1TWFA|2B8KG|3CQZF	1TWFA|3CQZF|3CQZH|3HOUP|3HOYC	0/15	2/15
PSB7_YEAST	18	1G0UI|3BDMP	1G0UG|1G0UI|1G0UZ|3BDMP	2/12	2/12
QCR1_YEAST	18	3CX5D|3CX5N|3CX5P|3CX5R|3CX5S	3CX5D|3CX5N|3CX5P|3CX5S	1/12	0/12
QCR6_YEAST	18	3CX5D|3CX5H	3CX5D|3CX5H|3CX5I	0/9	0/9
QCR7_YEAST	18	3CX5C|3CX5M|3CX5S	3CX5C|3CX5M|3CX5S	5/9	0/9
QCR8_YEAST	18	3CX5C|3CX5D|3CX5L|3CX5P|3CX5R	3CX5C|3CX5D|3CX5P	4/9	0/9
RAN_HUMAN	18	1I2MB|1IBRD|1K5DK|1QBKB|1RRPB	1IBRD|1K5DK|1QBKB	3/9	0/9
RBX1_HUMAN	18	1U6GA|1U6GC|2HYEC|3DPLC	1U6GA|1U6GC|2HYEC	1/9	0/9
RPAB2_YEAST	18	3CQZA|3CQZB|3HOUG	3CQZA|3CQZB|3HOUD	0/9	2/9
RPAB3_YEAST	18	3CQZA|3CQZK	3CQZA|3CQZK|3HOYC	0/9	0/9
RPB11_YEAST	18	1TWFA|1TWFB|3CQZL|3HOYC	1TWFA|1TWFB|3CQZH	0/9	0/9
RPB1_YEAST	18	1TWFB|3CQZE|3CQZF	1TWFB|3CQZF|3HOYC	1/9	0/9
B2MG_MOUSE	19	1BIIA|1CD1C|1K8DA|1LDPH|1S7QA|1S7UD	1BIIA|1CD1C|1LDPH|1S7UD	2/12	0/12
BLM10_YEAST	19	3L5QT|3L5QU	1VSYA|1VSYS|3L5QT	1/9	3/9
CY1_YEAST	19	3CX5A|3CX5C|3CX5G|3CX5H|3CX5P	3CX5C|3CX5G|3CX5H|3CX5P	6/12	0/12
CYB_YEAST	19	3CX5D|3CX5G|3CX5H|3CX5L	3CX5D|3CX5E|3CX5G	5/9	0/9
STX1A_RAT	19	1SFCC|1SFCE|3C98A	1SFCC|1SFCE|3C98A	6/9	0/9
SUMO1_HUMAN	19	1WYWA|1Z5SD|2ASQB|2G4DA|2IO2A|2KQSB|2PE6A|3KYCA|3KYCB	1WYWA|2IO2A|3KYCB	3/9	0/9
UBIQ_HUMAN	19	1NBFA|1S1QC|1XD3A|2IBIA|2K6DA|2KDFA|2KHWA|3IFWA|3IHPB|3JW0C|3LDZC	1XD3A|2KHWA|3JW0C|3LDZC	7/12	0/12
UCRI_YEAST	19	3CX5I|3CX5N|3CX5O	3CX5I|3CX5N|3CX5O	8/9	0/9
RPB3_YEAST	19	1TWFA|1TWFB|1TWFK	1TWFA|1TWFB|3CQZL	3/9	0/9
PSA1_YEAST	19	1G0UZ|1VSY5|3BDMD	1G0U1|1G0UZ|1VSY5|3BDMC	0/12	0/12
PSA2_YEAST	19	1G0UW|3BDMV	1G0UU|1G0UW|3BDMR	0/9	0/9
PSA3_YEAST	19	1G0UG|1G0US|1VSY7|3BDMB	1G0U1|1G0UG|1RYPB|1VSY7	6/12	0/12
PSA4_YEAST	19	1VSY8|3BDMC	1RYPP|1VSY8|3BDMC	0/9	0/9
PSA5_YEAST	19	1G0US|1G0UZ|1VSY8	1G0US|1RYPP|1VSY8	3/9	2/9
PSA6_YEAST	19	1RYPP|1VSY4|1Z7QU|3BDMB	1RYPP|1VSY4|1Z7QU|3BDMH	3/12	0/12
PSA7_YEAST	19	1VSY8|3BDMR	1RYPK|1VSY8|3BDMR	0/9	3/9
RPB2_YEAST	19	1TWFA|2B8KG|3HOUP	1TWFA|3CQZH|3HOUP	3/9	3/9
PSB7_YEAST	19	1G0UI|1G0UZ|1RYPL	1G0UG|1G0UI|1RYPL	2/9	0/9
QCR1_YEAST	19	3CX5D|3CX5P|3CX5S|3CX5T	3CX5D|3CX5M|3CX5S	5/9	0/9
QCR6_YEAST	19	3CX5D|3CX5H	3CX5D|3CX5H|3CX5I	0/9	0/9
QCR7_YEAST	19	3CX5C|3CX5M|3CX5S	3CX5C|3CX5M|3CX5S	1/9	0/9
QCR8_YEAST	19	3CX5C|3CX5D|3CX5L|3CX5P|3CX5R	3CX5C|3CX5D|3CX5P	6/9	0/9
RAN_HUMAN	19	1I2MB|1IBRD|1K5DK|1QBKB|1RRPB	1IBRD|1QBKB|1RRPB	3/9	0/9
RBX1_HUMAN	19	1U6GA|1U6GC|2HYEC|3DPLC	1U6GA|1U6GC|2HYEC	0/9	0/9
RPAB3_YEAST	19	3CQZA|3CQZK	3CQZA|3CQZK|3HOYC	0/9	0/9
RPB11_YEAST	19	1TWFA|1TWFB|3CQZL|3HOYC	1TWFA|1TWFB|3CQZH	0/9	0/9
RPB1_YEAST	19	1TWFB|3CQZE|3CQZF	1TWFB|3CQZF|3HOYC	3/9	0/9
B2MG_MOUSE	20	1BIIA|1CD1C|1K8DA|1LDPH|1S7QA|1S7UD	1BIIA|1LDPH|1S7QA|1S7UD	0/12	0/12
BLM10_YEAST	20	1VSYA|1VSYP	1VSYA|1VSYP|3L5QT	0/9	0/9
CY1_YEAST	20	3CX5A|3CX5C|3CX5H|3CX5I|3CX5P	3CX5C|3CX5H|3CX5I	4/9	0/9
CYB_YEAST	20	3CX5D|3CX5E|3CX5H	3CX5D|3CX5E|3CX5H	8/9	0/9
STX1A_RAT	20	1SFCC|1SFCE|3C98A	1SFCC|1SFCE|3C98A	6/9	0/9
SUMO1_HUMAN	20	1WYWA|1Z5SD|2ASQB|2G4DA|2IO2A|2KQSB|2PE6A|3KYCA|3KYCB	1WYWA|3KYCA|3KYCB	3/9	0/9
UBIQ_HUMAN	20	1NBFA|1S1QC|1XD3A|2IBIA|2K6DA|2KDFA|2KHWA|3IFWA|3IHPB|3JW0C|3LDZC	1XD3A|3IFWA|3IHPB|3JW0C	0/12	0/12
UCRI_YEAST	20	3CX5I|3CX5N|3CX5O	3CX5I|3CX5N|3CX5O	8/9	0/9
RPB3_YEAST	20	1TWFA|1TWFB|3CQZH	1TWFA|1TWFB|3CQZH	0/9	0/9
PSA1_YEAST	20	1VSY5|1Z7QG|3BDMD|3BDMP	1G0U1|1RYPB|1VSY5|3BDMC	0/12	0/12
PSA2_YEAST	20	1G0UW|3BDMV	1G0UU|1G0UW|1VSY7|3BDMV	3/12	0/12
PSA3_YEAST	20	1G0UG|1G0US|1VSY7|3BDMB	1G0UG|1G0US|1RYPB|1VSY7	3/12	0/12
PSA4_YEAST	20	1VSY8|3BDMC	1RYPP|1VSY8|3BDMC|3BDMV	0/12	3/12
PSA5_YEAST	20	1G0US|1VSY8|3BDMQ	1RYPP|1VSY8|3BDMQ	3/9	3/9
PSA6_YEAST	20	1RYPP|1VSY4|1Z7QU|3BDMB	1RYPP|1VSY4|3BDMD	3/9	0/9
PSA7_YEAST	20	1VSY8|3BDMB	1RYPK|1VSY8|3BDMB	1/9	0/9
RPB2_YEAST	20	1TWFA|2B8KG|3CQZF	1TWFA|1TWFK|3CQZF	4/9	0/9
PSB7_YEAST	20	1G0UI|1G0UZ|1RYPL	1G0UG|1G0UI|1RYPL|1RYPP	6/12	1/12
QCR1_YEAST	20	3CX5D|3CX5P|3CX5S|3CX5T	3CX5D|3CX5S|3CX5T	3/9	0/9
QCR6_YEAST	20	3CX5D|3CX5H	3CX5D|3CX5H|3CX5I	0/9	0/9
QCR7_YEAST	20	3CX5C|3CX5M|3CX5S	3CX5D|3CX5M|3CX5S	9/9	0/9
QCR8_YEAST	20	3CX5C|3CX5D|3CX5L|3CX5P|3CX5R	3CX5C|3CX5D|3CX5P	3/9	0/9
RPAB3_YEAST	20	3CQZA|3CQZK	3CQZA|3CQZK|3HOYC	0/9	0/9
RPB11_YEAST	20	1TWFA|1TWFB|3CQZL|3HOYC	1TWFA|1TWFB|3CQZL	1/9	0/9
RPB1_YEAST	20	1TWFB|1TWFK|3CQZH|3HOYC	3CQZF|3CQZH|3HOUP|3HOYC	5/12	0/12
B2MG_MOUSE	21	1BIIA|1CD1C|1K8DA|1LDPH|1S7QA|1S7UD	1BIIA|1K8DA|1S7QA|1S7UD	12/12	0/12
BLM10_YEAST	21	3L5QT|3L5QU	1VSYA|1VSYS|3L5QT	0/9	0/9
CY1_YEAST	21	3CX5A|3CX5C|3CX5H|3CX5I|3CX5P	3CX5C|3CX5H|3CX5I|3CX5P	9/12	0/12
CYB_YEAST	21	3CX5D|3CX5E|3CX5H	3CX5D|3CX5E|3CX5H	7/9	0/9
STX1A_RAT	21	1SFCC|1SFCE|3C98A	1SFCC|1SFCE|3C98A	6/9	0/9
SUMO1_HUMAN	21	1WYWA|1Z5SD|2ASQB|2G4DA|2IO2A|2KQSB|2PE6A|3KYCA|3KYCB	1Z5SD|2ASQB|3KYCB	6/9	0/9
UBIQ_HUMAN	21	1NBFA|1S1QC|1XD3A|2IBIA|2K6DA|2KDFA|2KHWA|3IFWA|3IHPB|3JW0C|3LDZC	1XD3A|3IFWA|3LDZC	0/9	0/9
UCRI_YEAST	21	3CX5I|3CX5N|3CX5O	3CX5I|3CX5N|3CX5O	6/9	0/9
RPB3_YEAST	21	1TWFA|1TWFB|3CQZH	1TWFA|1TWFB|3CQZH	1/9	0/9
PSA1_YEAST	21	1VSY5|1Z7QG|3BDMD|3BDMP	1RYPB|1VSY5|3BDMC|3BDMP	0/12	0/12
PSA2_YEAST	21	1G0UW|3BDMP	1G0UU|1G0UW|3BDMP|3BDMR	0/12	0/12
PSA3_YEAST	21	1G0UG|1G0US|1RYPB|3BDMB	1G0UG|1RYPB|3BDMB|3BDMD	0/12	0/12
PSA4_YEAST	21	1VSY8|3BDMC	1RYPY|1VSY8|3BDMV	0/9	3/9
PSA5_YEAST	21	1G0US|1VSY8|3BDMQ	1RYPP|1VSY8|3BDMQ	0/9	0/9
PSA6_YEAST	21	1RYPP|3BDMH	1RYPP|1VSY4|3BDMC|3BDMH	3/12	0/12
PSA7_YEAST	21	1RYPP|3BDMB|3BDMR	1RYPP|1VSY8|3BDMR	0/9	0/9
RPB2_YEAST	21	1TWFK|3CQZJ|3CQZL|3HOYC	1TWFA|1TWFI|1TWFK|3CQZL	3/12	3/12
PSB7_YEAST	21	1G0UI|3BDMP	1G0UG|1G0UI|3BDMP	3/9	0/9
QCR1_YEAST	21	3CX5D|3CX5N|3CX5P|3CX5R|3CX5S	3CX5N|3CX5P|3CX5S	3/9	0/9
QCR6_YEAST	21	3CX5D|3CX5H	3CX5D|3CX5H|3CX5I	0/9	0/9
QCR8_YEAST	21	3CX5C|3CX5D|3CX5L|3CX5P|3CX5R	3CX5C|3CX5D|3CX5P	2/9	0/9
RPAB3_YEAST	21	3CQZA|3CQZK	3CQZA|3CQZK|3HOYC	0/9	0/9
RPB11_YEAST	21	1TWFA|1TWFB|3CQZL|3HOYC	1TWFA|1TWFB|3CQZH	0/9	0/9
RPB1_YEAST	21	1TWFB|1TWFK|3CQZH|3HOYC	3CQZE|3CQZH|3HOYC	2/9	1/9
B2MG_MOUSE	22	1BIIA|1CD1C|1K8DA|1LDPH|1S7QA|1S7UD	1BIIA|1K8DA|1S7QA|1S7UD	3/12	0/12
BLM10_YEAST	22	3L5QT|3L5QU	1VSYA|1VSYS|3L5QT	0/9	1/9
CY1_YEAST	22	3CX5C|3CX5I|3CX5P	3CX5C|3CX5I|3CX5P	8/9	0/9
CYB_YEAST	22	3CX5D|3CX5G|3CX5H|3CX5L	3CX5D|3CX5E|3CX5G	0/9	0/9
STX1A_RAT	22	1SFCC|1SFCE|3C98A	1SFCC|1SFCE|3C98A	7/9	0/9
SUMO1_HUMAN	22	1WYWA|1Z5SD|2ASQB|2G4DA|2IO2A|2KQSB|2PE6A|3KYCA|3KYCB	1Z5SD|2ASQB|3KYCA	4/9	0/9
UBIQ_HUMAN	22	1NBFA|1S1QC|1XD3A|2IBIA|2K6DA|2KDFA|2KHWA|3IFWA|3IHPB|3JW0C|3LDZC	2KDFA|3IHPB|3JW0C|3LDZC	6/12	0/12
UCRI_YEAST	22	3CX5I|3CX5N|3CX5O	3CX5I|3CX5N|3CX5O	9/9	0/9
RPB3_YEAST	22	1TWFA|1TWFB|1TWFK	1TWFA|1TWFB|1TWFK	3/9	0/9
PSA1_YEAST	22	1G0UZ|1VSY5|3BDMD	1G0U1|1G0UZ|1VSY5	3/9	0/9
PSA2_YEAST	22	1G0UW|3BDMV	1G0UW|1VSY7|3BDMR|3BDMV	3/12	0/12
PSA3_YEAST	22	1G0UG|1G0US|1RYPB|3BDMB	1G0UG|1RYPB|3BDMB|3BDMD	0/12	0/12
PSA4_YEAST	22	1RYPP|1VSY8	1RYPP|1VSY8|3BDMV	0/9	0/9
PSA5_YEAST	22	1G0US|1G0UZ|1VSY8	1G0UZ|1RYPP|1VSY8|3BDMQ	1/12	0/12
PSA6_YEAST	22	1RYPP|1VSY4|1Z7QU|3BDMB	1RYPP|1VSY4|1Z7QU|3BDMB	0/12	0/12
PSA7_YEAST	22	1RYPP|3BDMB|3BDMR	1RYPP|1VSY8|3BDMR	3/9	0/9
RPB2_YEAST	22	1TWFA|1TWFK|3CQZJ|3HOYC	1TWFA|1TWFK|3CQZJ	3/9	0/9
PSB7_YEAST	22	1G0UI|1G0UZ|1RYPL	1G0UG|1G0UI|1G0UZ	3/9	0/9
QCR1_YEAST	22	3CX5D|3CX5P|3CX5S|3CX5T	3CX5N|3CX5P|3CX5T	3/9	0/9
QCR6_YEAST	22	3CX5D|3CX5H	3CX5D|3CX5H|3CX5I	0/9	0/9
QCR8_YEAST	22	3CX5C|3CX5F|3CX5P	3CX5C|3CX5F|3CX5P	6/9	0/9
RPAB3_YEAST	22	3CQZA|3CQZK	3CQZA|3CQZK|3HOYC	0/9	0/9
RPB11_YEAST	22	1TWFA|1TWFB|3CQZL|3HOYC	1TWFA|1TWFB|3CQZL	0/9	0/9
RPB1_YEAST	22	1TWFB|1TWFK|3CQZH|3HOYC	1TWFI|1TWFK|3CQZH|3HOYC	1/12	3/12
B2MG_MOUSE	23	1BIIA|1CD1C|1K8DA|1LDPH|1S7QA|1S7UD	1BIIA|1CD1C|1LDPH|1S7QA|1S7UD	4/15	0/15
BLM10_YEAST	23	1VSYA|1VSYP	1VSYA|1VSYP|3L5QT	1/9	0/9
CY1_YEAST	23	3CX5A|3CX5C|3CX5H|3CX5I|3CX5P	3CX5C|3CX5H|3CX5I|3CX5P	6/12	0/12
CYB_YEAST	23	3CX5D|3CX5G|3CX5H|3CX5L	3CX5E|3CX5H|3CX5L	6/9	0/9
STX1A_RAT	23	1SFCC|1SFCE|3C98A	1SFCC|1SFCE|3C98A	7/9	0/9
SUMO1_HUMAN	23	1WYWA|1Z5SD|2ASQB|2G4DA|2IO2A|2KQSB|2PE6A|3KYCA|3KYCB	1Z5SD|2ASQB|2IO2A	6/9	0/9
UBIQ_HUMAN	23	1NBFA|1S1QC|1XD3A|2IBIA|2K6DA|2KDFA|2KHWA|3IFWA|3IHPB|3JW0C|3LDZC	2KDFA|3IHPB|3LDZC	5/9	0/9
UCRI_YEAST	23	3CX5I|3CX5N|3CX5O	3CX5I|3CX5N|3CX5O	8/9	0/9
RPB3_YEAST	23	1TWFA|1TWFB|1TWFK	1TWFA|1TWFB|3CQZL	3/9	0/9
PSA1_YEAST	23	1G0U1|1G0UZ	1G0U1|1G0UZ|3BDMP	0/9	0/9
PSA2_YEAST	23	3BDMP|3BDMQ|3BDMR	1G0UW|3BDMQ|3BDMR	0/9	3/9
PSA3_YEAST	23	1G0UG|1G0US|1VSY7|3BDMB	1G0US|1RYPB|1VSY7	3/9	0/9
PSA4_YEAST	23	1RYPP|3BDMC|3BDMR	1G0UI|1RYPP|3BDMC	0/9	3/9
PSA5_YEAST	23	1G0US|1VSY8|3BDMQ	1RYPP|1VSY8|3BDMQ	0/9	0/9
PSA6_YEAST	23	1RYPP|1VSY4|1Z7QU|3BDMB	1RYPP|1VSY4|1Z7QU|3BDMC	3/12	0/12
PSA7_YEAST	23	1RYPP|3BDMB|3BDMR	1RYPP|1VSY8|3BDMR	3/9	0/9
RPB2_YEAST	23	1TWFA|1TWFK|3CQZJ|3HOYC	1TWFA|1TWFI|1TWFK|3HOYC	0/12	3/12
PSB7_YEAST	23	1G0UG|1G0UM|1RYPV	1G0UG|1G0UM|3BDMP	4/9	0/9
QCR1_YEAST	23	3CX5D|3CX5P|3CX5S|3CX5T	3CX5D|3CX5P|3CX5T	1/9	0/9
QCR6_YEAST	23	3CX5D|3CX5H	3CX5D|3CX5H|3CX5I	0/9	0/9
QCR8_YEAST	23	3CX5C|3CX5D|3CX5L|3CX5P|3CX5R	3CX5C|3CX5P|3CX5R	5/9	0/9
RPAB3_YEAST	23	3CQZA|3CQZK	3CQZA|3CQZK|3HOYC	3/9	0/9
RPB11_YEAST	23	1TWFA|1TWFB|3CQZL|3HOYC	1TWFA|1TWFB|3CQZH	0/9	0/9
RPB1_YEAST	23	1TWFB|1TWFK|3CQZH|3HOYC	1TWFK|3CQZH|3HOYC	1/9	0/9
B2MG_MOUSE	24	1BIIA|1CD1C|1K8DA|1LDPH|1S7QA|1S7UD	1CD1C|1K8DA|1S7QA|1S7UD	1/12	0/12
BLM10_YEAST	24	1VSYA|1VSYP	1VSYA|1VSYP|3L5QT	1/9	0/9
CY1_YEAST	24	3CX5A|3CX5C|3CX5H|3CX5I|3CX5P	3CX5C|3CX5H|3CX5I|3CX5P	10/12	0/12
CYB_YEAST	24	3CX5D|3CX5G|3CX5H|3CX5L	3CX5E|3CX5H|3CX5L	6/9	0/9
STX1A_RAT	24	1SFCC|1SFCE|3C98A	1SFCC|1SFCE|3C98A	6/9	0/9
SUMO1_HUMAN	24	1WYWA|1Z5SD|2ASQB|2G4DA|2IO2A|2KQSB|2PE6A|3KYCA|3KYCB	1Z5SD|2ASQB|2KQSB	9/9	0/9
UBIQ_HUMAN	24	1NBFA|1S1QC|1XD3A|2IBIA|2K6DA|2KDFA|2KHWA|3IFWA|3IHPB|3JW0C|3LDZC	1XD3A|2KDFA|3IHPB	3/9	0/9
UCRI_YEAST	24	3CX5I|3CX5N|3CX5O	3CX5I|3CX5N|3CX5O	6/9	0/9
RPB3_YEAST	24	1TWFA|1TWFB|1TWFK	1TWFA|1TWFB|1TWFK	3/9	0/9
PSA1_YEAST	24	1G0UZ|1VSY5|3BDMD	1G0U1|1G0UZ|1VSY5	3/9	0/9
PSA2_YEAST	24	1G0UW|3BDMV	1VSY7|3BDMR|3BDMV	0/9	0/9
PSA3_YEAST	24	1G0UG|1G0US|1VSY7|3BDMB	1G0UG|1VSY7|3BDMB	3/9	0/9
PSA4_YEAST	24	1RYPP|3BDMC|3BDMR	1G0UI|1RYPP|3BDMR	0/9	0/9
PSA5_YEAST	24	1G0US|1RYPP|3BDMP|3BDMQ	1RYPP|1VSY8|3BDMP|3BDMQ	0/12	0/12
PSA6_YEAST	24	1RYPP|1VSY4|1Z7QU|3BDMB	1RYPP|1VSY4|1Z7QU|3BDMC	3/12	0/12
PSA7_YEAST	24	1VSY8|3BDMB	1RYPP|1VSY8|3BDMB	3/9	3/9
RPB2_YEAST	24	1TWFA|1TWFK|3CQZJ|3HOYC	1TWFA|3CQZE|3CQZH|3CQZJ	2/12	1/12
PSB7_YEAST	24	1G0UG|1G0UM|1RYPV	1G0UG|1G0UM|1RYPP	8/9	0/9
QCR1_YEAST	24	3CX5D|3CX5P|3CX5S|3CX5T	3CX5D|3CX5P|3CX5T	1/9	0/9
QCR6_YEAST	24	3CX5D|3CX5H	3CX5D|3CX5H|3CX5I	0/9	0/9
QCR8_YEAST	24	3CX5C|3CX5D|3CX5L|3CX5P|3CX5R	3CX5C|3CX5P|3CX5R	8/9	0/9
RPAB3_YEAST	24	3CQZA|3CQZK	3CQZA|3CQZK|3HOYC	6/9	0/9
RPB11_YEAST	24	1TWFA|1TWFB|3CQZL|3HOYC	1TWFA|1TWFB|3CQZH	0/9	3/9
RPB1_YEAST	24	1TWFB|1TWFK|3CQZH|3HOYC	1TWFB|3HOUP|3HOYC	6/9	0/9
B2MG_MOUSE	25	1BIIA|1CD1C|1K8DA|1LDPH|1S7QA|1S7UD	1BIIA|1S7QA|1S7UD	7/9	0/9
BLM10_YEAST	25	3L5QT|3L5QU	1VSYA|3L5QK|3L5QT	0/9	1/9
CY1_YEAST	25	3CX5A|3CX5C|3CX5H|3CX5I|3CX5P	3CX5C|3CX5H|3CX5I|3CX5P	10/12	0/12
CYB_YEAST	25	3CX5D|3CX5G|3CX5H|3CX5L	3CX5D|3CX5G|3CX5H	3/9	0/9
STX1A_RAT	25	1SFCC|1SFCE|3C98A	1SFCC|1SFCE|3C98A	7/9	0/9
SUMO1_HUMAN	25	1WYWA|1Z5SD|2ASQB|2G4DA|2IO2A|2KQSB|2PE6A|3KYCA|3KYCB	1Z5SD|2ASQB|2KQSB	9/9	0/9
UBIQ_HUMAN	25	1NBFA|1S1QC|1XD3A|2IBIA|2K6DA|2KDFA|2KHWA|3IFWA|3IHPB|3JW0C|3LDZC	1NBFA|2KDFA|3IHPB	3/9	0/9
UCRI_YEAST	25	3CX5I|3CX5L|3CX5O|3CX5S	3CX5I|3CX5L|3CX5O	8/9	0/9
RPB3_YEAST	25	1TWFA|1TWFB|3CQZH	1TWFA|1TWFB|3CQZH	0/9	0/9
PSA1_YEAST	25	1VSY5|1Z7QG|3BDMD|3BDMP	1G0U1|1RYPB|1VSY5	0/9	3/9
PSA2_YEAST	25	1G0UU|3BDMP|3BDMQ	1G0UU|1VSY7|3BDMQ	0/9	1/9
PSA3_YEAST	25	1G0UG|1G0US|1VSY7|3BDMB	1G0U1|1G0UG|3BDMB	0/9	0/9
PSA4_YEAST	25	1G0UI|1RYPY	1G0UI|1RYPY|1VSY8	0/9	0/9
PSA5_YEAST	25	1G0US|1VSY8|3BDMQ	1RYPZ|1VSY8|3BDMQ	6/9	0/9
PSA6_YEAST	25	1RYPP|3BDMH	1RYPP|1Z7QU|3BDMD|3BDMH	3/12	0/12
PSA7_YEAST	25	1VSY8|3BDMB	1RYPP|1VSY8|3BDMB	6/9	3/9
RPB2_YEAST	25	1TWFA|2B8KG|3CQZF	1TWFA|3CQZE|3CQZF	3/9	0/9
PSB7_YEAST	25	1G0UG|1RYPP	1G0UG|1G0UZ|1RYPP	2/9	0/9
QCR1_YEAST	25	3CX5D|3CX5P|3CX5S|3CX5T	3CX5D|3CX5N|3CX5P|3CX5S|3CX5T	4/15	0/15
QCR6_YEAST	25	3CX5D|3CX5H	3CX5D|3CX5H|3CX5I	0/9	0/9
QCR8_YEAST	25	3CX5C|3CX5F|3CX5P	3CX5C|3CX5F|3CX5P	6/9	0/9
RPAB3_YEAST	25	3CQZA|3CQZK	3CQZA|3CQZB|3CQZK	0/9	0/9
RPB11_YEAST	25	1TWFA|1TWFB|3CQZL|3HOYC	1TWFA|3CQZH|3CQZL	0/9	2/9
RPB1_YEAST	25	1TWFB|1TWFK|3CQZH|3HOYC	1TWFB|3HOUP|3HOYC	5/9	0/9
B2MG_MOUSE	26	1BIIA|1CD1C|1K8DA|1LDPH|1S7QA|1S7UD	1BIIA	0/4	0/4
BLM10_YEAST	26	3L5QT|3L5QU	1VSYA|3L5QK|3L5QT	0/9	1/9
CY1_YEAST	26	3CX5A|3CX5C|3CX5H|3CX5I|3CX5P	3CX5C|3CX5H|3CX5I|3CX5P	4/12	0/12
CYB_YEAST	26	3CX5D|3CX5G|3CX5H|3CX5L	3CX5D|3CX5E|3CX5L	5/9	0/9
STX1A_RAT	26	1SFCC|1SFCE|3C98A	1SFCC|1SFCE|3C98A	7/9	0/9
SUMO1_HUMAN	26	1WYWA|1Z5SD|2ASQB|2G4DA|2IO2A|2KQSB|2PE6A|3KYCA|3KYCB	1Z5SD|2KQSB|3KYCB	9/9	0/9
UBIQ_HUMAN	26	1NBFA|1S1QC|1XD3A|2IBIA|2K6DA|2KDFA|2KHWA|3IFWA|3IHPB|3JW0C|3LDZC	2IBIA|2KDFA|3IHPB	1/9	0/9
UCRI_YEAST	26	3CX5I|3CX5L|3CX5O|3CX5S	3CX5L|3CX5O|3CX5S	3/9	0/9
RPB3_YEAST	26	1TWFA|1TWFB|3CQZH	1TWFA|1TWFB|3CQZH	0/9	0/9
PSA1_YEAST	26	1VSY5|1Z7QG|3BDMD|3BDMP	1G0U1|1RYPB|1VSY5	0/9	3/9
PSA2_YEAST	26	1G0UU|3BDMP|3BDMQ	1G0UE|1G0UU|1VSY7|3BDMQ	0/12	2/12
PSA3_YEAST	26	1G0UG|1G0US|1VSY7|3BDMB	1G0UG|1RYPB|1VSY7|3BDMB	0/12	0/12
PSA4_YEAST	26	1VSY8|3BDMC	1G0UI|1VSY8|3BDMR	0/9	0/9
PSA5_YEAST	26	1G0UZ|1RYPZ	1RYPP|1RYPZ|1VSY8	2/9	0/9
PSA6_YEAST	26	1RYPP|1VSY4|1Z7QU|3BDMB	1RYPP|1VSY4|3BDMB|3BDMD	3/12	2/12
RPB2_YEAST	26	1TWFA|2B8KG|3CQZF	1TWFA|1TWFK|3CQZE|3CQZF	3/12	0/12
PSB7_YEAST	26	1G0UG|1RYPP	1G0UG|1RYPL|1RYPP	3/9	0/9
QCR1_YEAST	26	3CX5D|3CX5P|3CX5S|3CX5T	3CX5D|3CX5P|3CX5S	0/9	0/9
QCR6_YEAST	26	3CX5D|3CX5H	3CX5D|3CX5H|3CX5I	0/9	0/9
QCR8_YEAST	26	3CX5C|3CX5D|3CX5F	3CX5D|3CX5F|3CX5R	0/9	0/9
RPAB3_YEAST	26	3CQZA|3CQZK	3CQZA|3CQZK|3HOYC	3/9	0/9
RPB11_YEAST	26	1TWFA|1TWFB|3CQZL|3HOYC	1TWFA|3CQZL|3HOYC	0/9	0/9
RPB1_YEAST	26	1TWFB|2B8KG|3CQZF|3HOUP	1TWFB|1TWFI|2B8KG	3/9	2/9
B2MG_MOUSE	27	1BIIA|1CD1C|1K8DA|1LDPH|1S7QA|1S7UD	1K8DA|1LDPH|1S7QA|1S7UD	9/12	0/12
BLM10_YEAST	27	1VSYS|1VSYU|3L5QK	1VSYP|1VSYS|1VSYU	6/9	0/9
CY1_YEAST	27	3CX5A|3CX5C|3CX5G|3CX5H|3CX5P	3CX5C|3CX5G|3CX5P	5/9	0/9
CYB_YEAST	27	3CX5D|3CX5G|3CX5H|3CX5L	3CX5D|3CX5E|3CX5G	5/9	0/9
STX1A_RAT	27	1SFCC|1SFCE|3C98A	1SFCC|1SFCE|3C98A	6/9	0/9
SUMO1_HUMAN	27	1WYWA|1Z5SD|2ASQB|2G4DA|2IO2A|2KQSB|2PE6A|3KYCA|3KYCB	1Z5SD|3KYCA|3KYCB	0/9	0/9
UBIQ_HUMAN	27	1NBFA|1S1QC|1XD3A|2IBIA|2K6DA|2KDFA|2KHWA|3IFWA|3IHPB|3JW0C|3LDZC	2KDFA|2KHWA|3IHPB	5/9	0/9
UCRI_YEAST	27	3CX5I|3CX5L|3CX5O|3CX5S	3CX5L|3CX5O|3CX5S	3/9	0/9
RPB3_YEAST	27	1TWFA|1TWFB|3CQZH	1TWFA|1TWFB|3CQZH	3/9	0/9
PSA1_YEAST	27	1G0U1|1G0UZ	1G0U1|1G0UZ|1RYPB	0/9	0/9
PSA2_YEAST	27	1VSY7|3BDMP	1G0UE|1VSY7|3BDMR	0/9	0/9
PSA3_YEAST	27	1G0UG|1G0US|1VSY7|3BDMB	1G0UG|1VSY7|3BDMB	1/9	0/9
PSA4_YEAST	27	1VSY8|3BDMC	1G0UI|1VSY8|3BDMR	0/9	0/9
PSA5_YEAST	27	1G0UZ|1RYPZ	1G0UZ|1RYPZ|1VSY8	0/9	0/9
PSA6_YEAST	27	1RYPP|1VSY4|1Z7QU|3BDMB	1RYPP|1VSY4|1Z7QU|3BDMB	5/12	0/12
RPB2_YEAST	27	1TWFA|1TWFI	1TWFI|3CQZH|3HOUP|3K7AM	2/12	2/12
PSB7_YEAST	27	1G0UG|1RYPP	1G0UG|1G0UI|1RYPP	6/9	0/9
QCR1_YEAST	27	3CX5D|3CX5P|3CX5S|3CX5T	3CX5D|3CX5S|3CX5T	3/9	0/9
QCR6_YEAST	27	3CX5D|3CX5H	3CX5D|3CX5H|3CX5I	0/9	0/9
QCR8_YEAST	27	3CX5C|3CX5D|3CX5F	3CX5D|3CX5F|3CX5P	1/9	0/9
RPAB3_YEAST	27	3CQZA|3CQZK	3CQZA|3CQZK|3HOYC	0/9	0/9
RPB11_YEAST	27	1TWFA|1TWFB|3CQZL|3HOYC	1TWFA|3CQZL|3HOYC	1/9	0/9
RPB1_YEAST	27	1TWFB|1TWFK|3CQZH|3HOYC	1TWFB|1TWFI|3CQZH	3/9	2/9
B2MG_MOUSE	28	1BIIA|1CD1C|1K8DA|1LDPH|1S7QA|1S7UD	1BIIA|1K8DA|1LDPH|1S7QA|1S7UD	4/15	0/15
BLM10_YEAST	28	3L5QT|3L5QU	1VSYP|1VSYU|3L5QU	0/9	0/9
CY1_YEAST	28	3CX5A|3CX5C|3CX5H|3CX5I|3CX5P	3CX5H|3CX5I|3CX5P	0/9	0/9
CYB_YEAST	28	3CX5D|3CX5G|3CX5H|3CX5L	3CX5D|3CX5E|3CX5L	3/9	0/9
STX1A_RAT	28	1SFCC|1SFCE|3C98A	1SFCC|1SFCE|3C98A	6/9	0/9
SUMO1_HUMAN	28	1WYWA|1Z5SD|2ASQB|2G4DA|2IO2A|2KQSB|2PE6A|3KYCA|3KYCB	1Z5SD|2KQSB|3KYCB	9/9	0/9
UBIQ_HUMAN	28	1NBFA|1S1QC|1XD3A|2IBIA|2K6DA|2KDFA|2KHWA|3IFWA|3IHPB|3JW0C|3LDZC	1S1QC|2IBIA|2KDFA	7/9	0/9
RPB3_YEAST	28	1TWFA|1TWFB|1TWFK	1TWFA|1TWFB|1TWFK	3/9	0/9
PSA1_YEAST	28	1VSY5|1Z7QG|3BDMD|3BDMP	1G0U1|1VSY5|1Z7QG	0/9	3/9
PSA2_YEAST	28	1VSY7|3BDMP	1G0UU|1VSY7|3BDMP|3BDMR	3/12	0/12
PSA3_YEAST	28	1G0UG|1G0US|1VSY7|3BDMB	1G0UG|1VSY7|3BDMD	0/9	0/9
PSA4_YEAST	28	1G0UI|3BDMV	1G0UI|1VSY8|3BDMV	3/9	0/9
PSA5_YEAST	28	1G0US|1RYPP|3BDMP|3BDMQ	1RYPP|1RYPZ|1VSY8|3BDMP	2/12	0/12
PSA6_YEAST	28	1RYPP|3BDMH	1RYPP|1VSY4|3BDMD|3BDMH	2/12	0/12
RPB2_YEAST	28	1TWFA|2B8KG|3HOUP	2B8KG|3CQZE|3CQZJ|3HOUP	3/12	2/12
PSB7_YEAST	28	1G0UG|1G0UM|1RYPV	1G0UG|1RYPV|3BDMP	0/9	1/9
QCR1_YEAST	28	3CX5M|3CX5R	3CX5M|3CX5R|3CX5S	1/9	0/9
QCR6_YEAST	28	3CX5D|3CX5H	3CX5D|3CX5H|3CX5I	0/9	0/9
QCR8_YEAST	28	3CX5C|3CX5D|3CX5F	3CX5D|3CX5F|3CX5R	6/9	3/9
RPAB3_YEAST	28	3CQZA|3CQZK	3CQZA|3CQZK|3HOYC	0/9	0/9
RPB11_YEAST	28	1TWFA|1TWFB|3CQZL|3HOYC	1TWFB|3CQZH|3CQZL	0/9	2/9
RPB1_YEAST	28	1TWFB|1TWFK|3CQZH|3HOYC	1TWFB|1TWFK|2B8KG	3/9	0/9
B2MG_MOUSE	29	1BIIA|1CD1C|1K8DA|1LDPH|1S7QA|1S7UD	1CD1C|1LDPH|1S7QA|1S7UD	4/12	0/12
BLM10_YEAST	29	1VSYP|3L5QT	1VSYP|3L5QK|3L5QT	1/9	0/9
CY1_YEAST	29	3CX5A|3CX5C|3CX5H|3CX5I|3CX5P	3CX5H|3CX5I|3CX5P	3/9	0/9
CYB_YEAST	29	3CX5D|3CX5G|3CX5H|3CX5L	3CX5D|3CX5E|3CX5L	1/9	0/9
STX1A_RAT	29	1SFCC|1SFCE|3C98A	1SFCC|1SFCE|3C98A	6/9	0/9
SUMO1_HUMAN	29	1WYWA|1Z5SD|2ASQB|2G4DA|2IO2A|2KQSB|2PE6A|3KYCA|3KYCB	1Z5SD|3KYCA|3KYCB	0/9	0/9
UBIQ_HUMAN	29	1NBFA|1S1QC|1XD3A|2IBIA|2K6DA|2KDFA|2KHWA|3IFWA|3IHPB|3JW0C|3LDZC	1S1QC|2IBIA|2KDFA|2KHWA	8/12	0/12
RPB3_YEAST	29	1TWFA|1TWFB|3CQZH	1TWFA|1TWFB|3CQZH	0/9	0/9
PSA1_YEAST	29	1VSY5|1Z7QG|3BDMD|3BDMP	1G0U1|1VSY5|3BDMC	0/9	0/9
PSA2_YEAST	29	1G0UU|3BDMV	1G0UE|1G0UU|3BDMR	1/9	0/9
PSA3_YEAST	29	1G0UG|1G0US|1VSY7|3BDMB	1G0UG|1VSY7|3BDMD	0/9	0/9
PSA4_YEAST	29	1VSY8|3BDMC	1G0UI|1VSY8|3BDMC	3/9	0/9
PSA5_YEAST	29	1G0US|1G0UZ|1VSY8	1G0US|1G0UZ|1VSY8	0/9	0/9
PSA6_YEAST	29	1RYPP|1VSY4|1Z7QU|3BDMB	1VSY4|1Z7QU|3BDMD	0/9	3/9
RPB2_YEAST	29	1TWFA|1TWFK|3CQZJ|3HOYC	1TWFA|1TWFK|3HOYC	5/9	0/9
PSB7_YEAST	29	1G0UG|1G0UM|1RYPV	1G0UG|1RYPV|3BDMP	0/9	0/9
QCR1_YEAST	29	3CX5M|3CX5R	3CX5D|3CX5M|3CX5R	3/9	3/9
QCR6_YEAST	29	3CX5D|3CX5H	3CX5D|3CX5H|3CX5I	0/9	0/9
RPAB3_YEAST	29	3CQZA|3CQZK	3CQZA|3CQZK|3HOYC	0/9	0/9
RPB11_YEAST	29	1TWFA|1TWFB|3CQZL|3HOYC	1TWFB|3CQZH|3CQZL	0/9	1/9
RPB1_YEAST	29	1TWFB|3CQZE|3CQZF	1TWFB|1TWFK|3CQZF	3/9	0/9
B2MG_MOUSE	30	1BIIA|1CD1C|1K8DA|1LDPH|1S7QA|1S7UD	1CD1C|1LDPH|1S7QA	9/9	0/9
BLM10_YEAST	30	1VSYP|3L5QT	1VSYP|1VSYS|3L5QT	2/9	0/9
CY1_YEAST	30	3CX5A|3CX5C|3CX5H|3CX5I|3CX5P	3CX5C|3CX5H|3CX5I|3CX5P	3/12	0/12
CYB_YEAST	30	3CX5D|3CX5G|3CX5H|3CX5L	3CX5D|3CX5E|3CX5L	1/9	0/9
STX1A_RAT	30	1SFCC|1SFCE|3C98A	1SFCC|1SFCE|3C98A	6/9	0/9
SUMO1_HUMAN	30	1WYWA|1Z5SD|2ASQB|2G4DA|2IO2A|2KQSB|2PE6A|3KYCA|3KYCB	1Z5SD|3KYCA|3KYCB	0/9	0/9
UBIQ_HUMAN	30	1NBFA|1S1QC|1XD3A|2IBIA|2K6DA|2KDFA|2KHWA|3IFWA|3IHPB|3JW0C|3LDZC	2IBIA|2KDFA|3IHPB	2/9	0/9
RPB3_YEAST	30	1TWFA|1TWFB|3CQZH	1TWFA|1TWFB|3CQZH	3/9	0/9
PSA1_YEAST	30	1VSY5|1Z7QG|3BDMD|3BDMP	1G0U1|1VSY5|3BDMC	0/9	0/9
PSA2_YEAST	30	1G0UU|3BDMV	1G0UE|1G0UU|3BDMV	0/9	0/9
PSA3_YEAST	30	1G0UG|1G0US|1VSY7|3BDMB	1VSY7|3BDMB|3BDMD	3/9	0/9
PSA4_YEAST	30	1G0UI|3BDMV	1G0UI|1VSY8|3BDMV	0/9	0/9
PSA5_YEAST	30	1G0US|1G0UZ|1VSY8	1G0US|1G0UZ|3BDMP	0/9	0/9
PSA6_YEAST	30	1RYPP|1VSY4|1Z7QU|3BDMB	1VSY4|1Z7QU|3BDMD	0/9	3/9
RPB2_YEAST	30	1TWFA|2B8KG|3CQZF	1TWFA|1TWFK|2B8KG	2/9	0/9
PSB7_YEAST	30	1G0UG|1RYPP	1G0UG|1RYPP|3BDMP	1/9	0/9
QCR1_YEAST	30	3CX5D|3CX5N|3CX5P|3CX5R|3CX5S	3CX5N|3CX5R|3CX5S	3/9	0/9
QCR6_YEAST	30	3CX5D|3CX5H	3CX5D|3CX5H|3CX5I	0/9	0/9
RPAB3_YEAST	30	3CQZA|3CQZK	3CQZA|3CQZK|3HOYC	0/9	0/9
RPB11_YEAST	30	1TWFA|1TWFB|3CQZL|3HOYC	1TWFB|3CQZH|3CQZL	0/9	1/9
RPB1_YEAST	30	1TWFB|1TWFK|3CQZH|3HOYC	1TWFB|1TWFK|3HOYC	3/9	0/9
B2MG_MOUSE	31	1BIIA|1CD1C|1K8DA|1LDPH|1S7QA|1S7UD	1CD1C|1LDPH|1S7QA|1S7UD	8/12	0/12
BLM10_YEAST	31	3L5QT|3L5QU	1VSYP|3L5QT|3L5QU	2/9	0/9
CY1_YEAST	31	3CX5A|3CX5C|3CX5H|3CX5I|3CX5P	3CX5C|3CX5G|3CX5H|3CX5I	5/12	0/12
CYB_YEAST	31	3CX5D|3CX5G|3CX5H|3CX5L	3CX5D|3CX5E|3CX5L	9/9	0/9
SUMO1_HUMAN	31	1WYWA|1Z5SD|2ASQB|2G4DA|2IO2A|2KQSB|2PE6A|3KYCA|3KYCB	1Z5SD|3KYCA|3KYCB	0/9	0/9
UBIQ_HUMAN	31	1NBFA|1S1QC|1XD3A|2IBIA|2K6DA|2KDFA|2KHWA|3IFWA|3IHPB|3JW0C|3LDZC	1S1QC|2KDFA|2KHWA	6/9	0/9
RPB3_YEAST	31	1TWFA|1TWFB|1TWFK	1TWFA|1TWFB|1TWFK	3/9	0/9
PSA1_YEAST	31	1VSY5|1Z7QG|3BDMD|3BDMP	1G0U1|3BDMC|3BDMP	0/9	0/9
PSA2_YEAST	31	1G0UU|1VSY7	1G0UE|1G0UU|1VSY7	0/9	0/9
PSA3_YEAST	31	1G0UG|1G0US|1VSY7|3BDMB	1G0U1|1G0UG|3BDMB	0/9	0/9
PSA4_YEAST	31	1RYPP|3BDMC|3BDMR	1G0UI|3BDMC|3BDMR	3/9	3/9
PSA5_YEAST	31	1G0US|1G0UZ|1VSY8	1G0US|1RYPP|1VSY8	4/9	0/9
PSA6_YEAST	31	1RYPP|3BDMH	1VSY4|3BDMC|3BDMH	0/9	0/9
RPB2_YEAST	31	1TWFA|2B8KG|3CQZF	1TWFA|3CQZE|3CQZH	0/9	0/9
PSB7_YEAST	31	1G0UI|3BDMP	1G0UG|1G0UI|3BDMP	2/9	0/9
QCR1_YEAST	31	3CX5D|3CX5P|3CX5S|3CX5T	3CX5D|3CX5N|3CX5P|3CX5S|3CX5T	6/15	0/15
QCR6_YEAST	31	3CX5D|3CX5H	3CX5D|3CX5H|3CX5I	0/9	0/9
RPAB3_YEAST	31	3CQZA|3CQZK	3CQZA|3CQZK|3HOYC	3/9	0/9
RPB11_YEAST	31	1TWFA|1TWFB|3CQZL|3HOYC	1TWFB|3CQZH|3CQZL	0/9	2/9
RPB1_YEAST	31	1TWFB|1TWFK|3CQZH|3HOYC	1TWFB|1TWFK|3HOUP	4/9	2/9
B2MG_MOUSE	32	1BIIA|1CD1C|1K8DA|1LDPH|1S7QA|1S7UD	1BIIA|1K8DA|1LDPH|1S7QA	4/12	0/12
BLM10_YEAST	32	3L5QT|3L5QU	1VSYP|3L5QT|3L5QU	2/9	0/9
CY1_YEAST	32	3CX5A|3CX5C|3CX5H|3CX5I|3CX5P	3CX5H|3CX5I|3CX5P	4/9	0/9
CYB_YEAST	32	3CX5D|3CX5G|3CX5H|3CX5L	3CX5D|3CX5E|3CX5G	3/9	0/9
SUMO1_HUMAN	32	1WYWA|1Z5SD|2ASQB|2G4DA|2IO2A|2KQSB|2PE6A|3KYCA|3KYCB	1Z5SD|3KYCA|3KYCB	0/9	0/9
UBIQ_HUMAN	32	1NBFA|1S1QC|1XD3A|2IBIA|2K6DA|2KDFA|2KHWA|3IFWA|3IHPB|3JW0C|3LDZC	1S1QC|2KDFA|2KHWA	5/9	0/9
RPB3_YEAST	32	1TWFA|1TWFB|1TWFK	1TWFA|1TWFB|3CQZL	0/9	0/9
PSA1_YEAST	32	1RYPB|1Z7QG|3BDMD|3BDMP	1G0U1|1RYPB|3BDMP	0/9	0/9
PSA2_YEAST	32	1G0UW|3BDMV	1G0UE|1G0UW|1VSY7	0/9	1/9
PSA3_YEAST	32	1G0U1|1G0US	1G0U1|1RYPB|1VSY7	3/9	0/9
PSA4_YEAST	32	1G0UI|3BDMV	1G0UI|3BDMR|3BDMV	3/9	0/9
PSA5_YEAST	32	1G0US|1G0UZ|1VSY8	1G0US|1RYPP|1VSY8	3/9	2/9
PSA6_YEAST	32	1RYPP|3BDMH	1VSY4|3BDMD|3BDMH	0/9	0/9
RPB2_YEAST	32	1TWFA|2B8KG|3CQZF	1TWFA|2B8KG|3CQZE	0/9	0/9
PSB7_YEAST	32	1G0UM|1G0UZ|1RYPV	1G0UG|1G0UZ|3BDMP	0/9	2/9
QCR1_YEAST	32	3CX5D|3CX5P|3CX5S|3CX5T	3CX5N|3CX5P|3CX5S|3CX5T	3/12	0/12
QCR6_YEAST	32	3CX5D|3CX5H	3CX5D|3CX5H|3CX5I	0/9	0/9
RPB11_YEAST	32	1TWFA|1TWFB|3CQZL|3HOYC	1TWFB|3CQZL|3HOYC	0/9	0/9
RPB1_YEAST	32	1TWFB|1TWFK|3CQZH|3HOYC	1TWFB|1TWFK|3HOUP	4/9	3/9
B2MG_MOUSE	33	1BIIA|1CD1C|1K8DA|1LDPH|1S7QA|1S7UD	1BIIA|1K8DA|1LDPH|1S7QA	0/12	0/12
BLM10_YEAST	33	3L5QT|3L5QU	1VSYS|3L5QT|3L5QU	1/9	0/9
CY1_YEAST	33	3CX5A|3CX5C|3CX5H|3CX5I|3CX5P	3CX5H|3CX5I|3CX5P	3/9	0/9
CYB_YEAST	33	3CX5D|3CX5G|3CX5H|3CX5L	3CX5D|3CX5G|3CX5L	5/9	0/9
SUMO1_HUMAN	33	1WYWA|1Z5SD|2ASQB|2G4DA|2IO2A|2KQSB|2PE6A|3KYCA|3KYCB	1Z5SD|3KYCA|3KYCB	0/9	0/9
UBIQ_HUMAN	33	1NBFA|1S1QC|1XD3A|2IBIA|2K6DA|2KDFA|2KHWA|3IFWA|3IHPB|3JW0C|3LDZC	1NBFA|2KDFA|3IHPB	3/9	0/9
RPB3_YEAST	33	1TWFA|1TWFB|1TWFK	1TWFA|1TWFB|1TWFK	3/9	0/9
PSA1_YEAST	33	1RYPB|1Z7QG|3BDMD|3BDMP	1G0UZ|1RYPB|3BDMC	0/9	0/9
PSA2_YEAST	33	1VSY7|3BDMP	1G0UE|1VSY7|3BDMR	0/9	0/9
PSA3_YEAST	33	1G0U1|1G0US	1G0U1|1RYPB|1VSY7	2/9	0/9
PSA4_YEAST	33	1RYPP|3BDMC|3BDMR	1RYPP|1RYPY|3BDMR	0/9	3/9
PSA5_YEAST	33	1G0US|1RYPP|3BDMP|3BDMQ	1G0US|1RYPP|1Z7QU	0/9	0/9
PSA6_YEAST	33	1RYPP|1VSY4|1Z7QU|3BDMB	1RYPP|1VSY4|3BDMB	3/9	0/9
RPB2_YEAST	33	1TWFK|3CQZJ|3CQZL|3HOYC	1TWFA|3CQZL|3HOYC	3/9	0/9
PSB7_YEAST	33	1G0UG|1RYPP	1G0UG|1RYPP|3BDMP	4/9	0/9
QCR1_YEAST	33	3CX5D|3CX5N|3CX5P|3CX5R|3CX5S	3CX5N|3CX5P|3CX5R|3CX5S|3CX5T	3/15	0/15
QCR6_YEAST	33	3CX5D|3CX5H	3CX5D|3CX5H|3CX5I	0/9	0/9
RPB11_YEAST	33	1TWFA|1TWFB|3CQZL|3HOYC	1TWFB|3CQZL|3HOYC	3/9	0/9
RPB1_YEAST	33	1TWFB|1TWFK|3CQZH|3HOYC	1TWFB|1TWFK|3HOUP	4/9	3/9
B2MG_MOUSE	34	1BIIA|1CD1C|1K8DA|1LDPH|1S7QA|1S7UD	1BIIA|1K8DA|1LDPH|1S7UD	1/12	0/12
BLM10_YEAST	34	3L5QT|3L5QU	1VSYS|3L5QT|3L5QU	5/9	0/9
CY1_YEAST	34	3CX5A|3CX5C|3CX5H|3CX5I|3CX5P	3CX5H|3CX5I|3CX5P	4/9	0/9
CYB_YEAST	34	3CX5D|3CX5G|3CX5H|3CX5L	3CX5D|3CX5H|3CX5L	3/9	0/9
SUMO1_HUMAN	34	1WYWA|1Z5SD|2ASQB|2G4DA|2IO2A|2KQSB|2PE6A|3KYCA|3KYCB	2ASQB|2KQSB|3KYCA	6/9	0/9
UBIQ_HUMAN	34	1NBFA|1S1QC|1XD3A|2IBIA|2K6DA|2KDFA|2KHWA|3IFWA|3IHPB|3JW0C|3LDZC	1XD3A|2KDFA|3IHPB	3/9	0/9
RPB3_YEAST	34	1TWFA|1TWFB|1TWFK	1TWFA|1TWFB|1TWFK	3/9	0/9
PSA1_YEAST	34	1VSY5|1Z7QG|3BDMD|3BDMP	1G0UZ|1VSY5|3BDMP	3/9	0/9
PSA2_YEAST	34	1G0UW|3BDMV	1G0UE|1VSY7|3BDMV	0/9	0/9
PSA3_YEAST	34	1G0U1|1G0US	1G0U1|1RYPB|1VSY7	3/9	0/9
PSA4_YEAST	34	1RYPP|1VSY8	1RYPP|1VSY8|3BDMV	3/9	0/9
PSA5_YEAST	34	1G0UZ|1RYPZ	1G0US|1G0UZ|1RYPZ	0/9	0/9
PSA6_YEAST	34	1RYPP|1VSY4|1Z7QU|3BDMB	1RYPH|1RYPP|3BDMB|3BDMD	0/12	0/12
RPB2_YEAST	34	1TWFK|3CQZJ|3CQZL|3HOYC	1TWFA|1TWFK|3CQZL|3HOYC	6/12	0/12
PSB7_YEAST	34	1G0UI|3BDMP	1G0UI|1G0UM|3BDMP	0/9	3/9
QCR1_YEAST	34	3CX5D|3CX5N|3CX5P|3CX5R|3CX5S	3CX5N|3CX5R|3CX5S	1/9	0/9
QCR6_YEAST	34	3CX5D|3CX5H	3CX5D|3CX5H|3CX5I	0/9	0/9
RPB11_YEAST	34	1TWFA|1TWFB|3CQZL|3HOYC	3CQZH|3CQZL|3HOYC	0/9	2/9
RPB1_YEAST	34	1TWFB|2B8KG|3CQZF|3HOUP	1TWFB|2B8KG|3HOUP	1/9	0/9
B2MG_MOUSE	35	1BIIA|1CD1C|1K8DA|1LDPH|1S7QA|1S7UD	1BIIA|1K8DA|1LDPH|1S7UD	3/12	0/12
BLM10_YEAST	35	1VSYS|1VSYU|3L5QK	1VSYU|3L5QK|3L5QT	0/9	0/9
CY1_YEAST	35	3CX5A|3CX5C|3CX5H|3CX5I|3CX5P	3CX5H|3CX5I|3CX5P	9/9	0/9
CYB_YEAST	35	3CX5D|3CX5G|3CX5H|3CX5L	3CX5D|3CX5H|3CX5L	6/9	0/9
SUMO1_HUMAN	35	1WYWA|1Z5SD|2ASQB|2G4DA|2IO2A|2KQSB|2PE6A|3KYCA|3KYCB	2ASQB|2KQSB|2PE6A	6/9	0/9
UBIQ_HUMAN	35	1NBFA|1S1QC|1XD3A|2IBIA|2K6DA|2KDFA|2KHWA|3IFWA|3IHPB|3JW0C|3LDZC	2KDFA|2KHWA|3IHPB	5/9	0/9
RPB3_YEAST	35	1TWFA|1TWFB|1TWFK	1TWFA|1TWFK|3CQZH	3/9	3/9
PSA1_YEAST	35	1G0UZ|1VSY5|3BDMD	1G0UZ|1VSY5|3BDMC	0/9	0/9
PSA2_YEAST	35	1G0UW|3BDMV	1G0UE|1VSY7|3BDMV	0/9	0/9
PSA3_YEAST	35	1G0UG|1G0US|1VSY7|3BDMB	1G0U1|1VSY7|3BDMB	3/9	0/9
PSA4_YEAST	35	1RYPP|1VSY8	1RYPP|1VSY8|3BDMV	1/9	0/9
PSA5_YEAST	35	1G0US|1G0UZ|1VSY8	1G0US|1VSY8|1Z7QU	1/9	0/9
PSA6_YEAST	35	1RYPP|1VSY4|1Z7QU|3BDMB	1RYPP|3BDMB|3BDMC	3/9	0/9
RPB2_YEAST	35	1TWFA|2B8KG|3CQZF	1TWFA|3CQZH|3CQZL	0/9	3/9
PSB7_YEAST	35	1G0UI|1G0UZ|1RYPL	1G0UI|1G0UZ|1RYPP	2/9	3/9
QCR1_YEAST	35	3CX5M|3CX5R	3CX5M|3CX5P|3CX5R	2/9	0/9
QCR6_YEAST	35	3CX5D|3CX5H	3CX5D|3CX5H|3CX5I	0/9	0/9
RPB11_YEAST	35	1TWFA|1TWFB|3CQZL|3HOYC	3CQZH|3CQZL|3HOYC	3/9	0/9
RPB1_YEAST	35	1TWFB|1TWFK|3CQZH|3HOYC	1TWFB|2B8KG|3CQZH	6/9	3/9
B2MG_MOUSE	36	1BIIA|1CD1C|1K8DA|1LDPH|1S7QA|1S7UD	1BIIA|1K8DA|1S7QA|1S7UD	1/12	0/12
CY1_YEAST	36	3CX5C|3CX5F|3CX5H|3CX5P	3CX5F|3CX5I|3CX5P	6/9	3/9
CYB_YEAST	36	3CX5D|3CX5G|3CX5H|3CX5L	3CX5E|3CX5H|3CX5L	1/9	0/9
SUMO1_HUMAN	36	1WYWA|1Z5SD|2ASQB|2G4DA|2IO2A|2KQSB|2PE6A|3KYCA|3KYCB	2G4DA|3KYCA|3KYCB	0/9	0/9
UBIQ_HUMAN	36	1NBFA|1S1QC|1XD3A|2IBIA|2K6DA|2KDFA|2KHWA|3IFWA|3IHPB|3JW0C|3LDZC	2KDFA|2KHWA|3IHPB	5/9	0/9
RPB3_YEAST	36	1TWFA|1TWFB|1TWFK	1TWFA|1TWFB|1TWFK	6/9	0/9
PSA1_YEAST	36	1VSY5|1Z7QG|3BDMD|3BDMP	1G0UZ|1VSY5|1Z7QG	0/9	0/9
PSA2_YEAST	36	1VSY7|3BDMP	1G0UE|1VSY7|3BDMP	2/9	0/9
PSA3_YEAST	36	1G0U1|1G0US	1G0U1|1VSY7|3BDMD	0/9	0/9
PSA4_YEAST	36	1RYPP|3BDMC|3BDMR	1RYPP|1VSY8|3BDMR	0/9	0/9
PSA5_YEAST	36	1G0US|1G0UZ|1VSY8	1G0US|1VSY8|3BDMP	2/9	0/9
PSA6_YEAST	36	1RYPP|3BDMH	1G0U1|1RYPP|3BDMC|3BDMH	6/12	0/12
RPB2_YEAST	36	1TWFK|3CQZJ|3CQZL|3HOYC	1TWFA|3CQZJ|3CQZL	6/9	0/9
PSB7_YEAST	36	1G0UI|3BDMP	1G0UI|1RYPP|3BDMP	5/9	0/9
QCR1_YEAST	36	3CX5D|3CX5N|3CX5P|3CX5R|3CX5S	3CX5N|3CX5P|3CX5S	4/9	0/9
QCR6_YEAST	36	3CX5D|3CX5H	3CX5D|3CX5H|3CX5I	0/9	0/9
RPB1_YEAST	36	1TWFB|2B8KG|3CQZF|3HOUP	1TWFB|2B8KG|3HOUP	3/9	0/9
B2MG_MOUSE	37	1BIIA|1CD1C|1K8DA|1LDPH|1S7QA|1S7UD	1BIIA|1K8DA|1LDPH|1S7QA	12/12	0/12
CY1_YEAST	37	3CX5A|3CX5G|3CX5H|3CX5P	3CX5A|3CX5G|3CX5W	0/9	0/9
CYB_YEAST	37	3CX5D|3CX5G|3CX5H|3CX5L	3CX5G|3CX5H|3CX5L	3/9	0/9
SUMO1_HUMAN	37	1WYWA|1Z5SD|2ASQB|2G4DA|2IO2A|2KQSB|2PE6A|3KYCA|3KYCB	2PE6A|3KYCA|3KYCB	0/9	0/9
UBIQ_HUMAN	37	1NBFA|1S1QC|1XD3A|2IBIA|2K6DA|2KDFA|2KHWA|3IFWA|3IHPB|3JW0C|3LDZC	2KDFA|3IHPB|3LDZC	3/9	0/9
RPB3_YEAST	37	1TWFA|1TWFB|1TWFK	1TWFA|1TWFB|1TWFK	6/9	0/9
PSA1_YEAST	37	1VSY5|1Z7QG|3BDMD|3BDMP	1RYPB|1VSY5|3BDMC	0/9	0/9
PSA2_YEAST	37	1G0UW|3BDMV	1G0UE|1G0UW|1VSY7	1/9	0/9
PSA3_YEAST	37	1G0UG|1G0US|1VSY7|3BDMB	1G0U1|1VSY7|3BDMB	0/9	0/9
PSA4_YEAST	37	1RYPP|1VSY8	1RYPP|1VSY8|3BDMV	0/9	0/9
PSA5_YEAST	37	1G0US|1G0UZ|1VSY8	1G0US|1VSY8|1Z7QU	1/9	0/9
PSA6_YEAST	37	1RYPP|3BDMH	1G0U1|1RYPP|3BDMC|3BDMH	1/12	0/12
RPB2_YEAST	37	1TWFA|1TWFK|3CQZJ|3HOYC	1TWFA|1TWFK|3HOYC	4/9	0/9
PSB7_YEAST	37	1G0UI|3BDMP	1G0UI|1RYPP|3BDMP	4/9	1/9
QCR1_YEAST	37	3CX5D|3CX5N|3CX5P|3CX5R|3CX5S	3CX5D|3CX5N|3CX5P|3CX5S	0/12	0/12
QCR6_YEAST	37	3CX5D|3CX5H	3CX5D|3CX5H|3CX5I	0/9	0/9
RPB1_YEAST	37	1TWFB|3CQZE|3CQZF	1TWFB|3CQZE|3HOUP	0/9	0/9
B2MG_MOUSE	38	1BIIA|1CD1C|1K8DA|1LDPH|1S7QA|1S7UD	1CD1C|1K8DA|1LDPH	0/9	0/9
CY1_YEAST	38	3CX5A|3CX5G|3CX5H|3CX5P	3CX5A|3CX5G|3CX5I	0/9	3/9
UBIQ_HUMAN	38	1NBFA|1S1QC|1XD3A|2IBIA|2K6DA|2KDFA|2KHWA|3IFWA|3IHPB|3JW0C|3LDZC	1NBFA|2KDFA|3IHPB	6/9	0/9
RPB3_YEAST	38	1TWFA|1TWFB|1TWFK	1TWFA|1TWFB|1TWFK	3/9	0/9
PSA1_YEAST	38	1VSY5|1Z7QG|3BDMD|3BDMP	1RYPB|1VSY5|3BDMC	0/9	0/9
PSA2_YEAST	38	1G0UW|3BDMV	1G0UE|1VSY7|3BDMV	0/9	0/9
PSA3_YEAST	38	1G0UG|1G0US|1RYPB|3BDMB	1G0U1|1RYPB|3BDMB	0/9	0/9
PSA4_YEAST	38	1VSY8|3BDMC	1RYPP|1VSY8|3BDMC	0/9	0/9
PSA5_YEAST	38	1G0US|1VSY8|3BDMQ	1G0US|1VSY8|3BDMQ	0/9	0/9
PSA6_YEAST	38	1RYPP|3BDMH	1G0U1|1RYPP|3BDMH	3/9	0/9
RPB2_YEAST	38	1TWFA|1TWFK|3CQZJ|3HOYC	1TWFA|1TWFK|3HOYC	0/9	0/9
PSB7_YEAST	38	1G0UI|3BDMP	1G0UI|1RYPV|3BDMP	4/9	0/9
QCR1_YEAST	38	3CX5D|3CX5N|3CX5P|3CX5R|3CX5S	3CX5D|3CX5N|3CX5P|3CX5S	0/12	0/12
QCR6_YEAST	38	3CX5D|3CX5H	3CX5D|3CX5H|3CX5I	0/9	0/9
RPB1_YEAST	38	1TWFB|3CQZE|3CQZF	1TWFB|1TWFK|3CQZE	6/9	3/9
B2MG_MOUSE	39	1BIIA|1CD1C|1K8DA|1LDPH|1S7QA|1S7UD	1LDPH|1S7QA|1S7UD	2/12	0/12
CY1_YEAST	39	3CX5A|3CX5G|3CX5H|3CX5P	3CX5A|3CX5G|3CX5I	1/9	1/9
UBIQ_HUMAN	39	1NBFA|1S1QC|1XD3A|2IBIA|2K6DA|2KDFA|2KHWA|3IFWA|3IHPB|3JW0C|3LDZC	2KDFA|3IHPB|3JW0C	0/9	0/9
RPB3_YEAST	39	1TWFA|1TWFB|1TWFK	1TWFA|1TWFB|1TWFK	3/9	0/9
PSA1_YEAST	39	1RYPB|1Z7QG|3BDMD|3BDMP	1RYPB|1Z7QG|3BDMP	0/9	0/9
PSA2_YEAST	39	1G0UU|1VSY7	1G0UU|1G0UW|1VSY7	0/9	0/9
PSA3_YEAST	39	1G0UG|1G0US|1VSY7|3BDMB	1G0UG|1G0US|3BDMD	3/9	0/9
PSA4_YEAST	39	1VSY8|3BDMC	1RYPP|1VSY8|3BDMC	0/9	0/9
PSA5_YEAST	39	1G0US|1RYPP|3BDMP|3BDMQ	1G0US|1Z7QU|3BDMP	0/9	0/9
PSA6_YEAST	39	1RYPP|1VSY4|1Z7QU|3BDMB	1G0U1|1RYPP|1VSY4	0/9	0/9
RPB2_YEAST	39	1TWFA|1TWFK|3CQZJ|3HOYC	1TWFA|1TWFK|3HOYC	0/9	0/9
PSB7_YEAST	39	1G0UM|1G0UZ|1RYPV	1G0UM|1G0UZ|1RYPP	6/9	3/9
QCR1_YEAST	39	3CX5D|3CX5N|3CX5P|3CX5R|3CX5S	3CX5D|3CX5N|3CX5P|3CX5S	0/12	0/12
QCR6_YEAST	39	3CX5D|3CX5H	3CX5D|3CX5H|3CX5I	0/9	0/9
RPB1_YEAST	39	1TWFB|3CQZE|3CQZF	1TWFB|3CQZF|3CQZH	3/9	2/9
B2MG_MOUSE	40	1BIIA|1CD1C|1K8DA|1LDPH|1S7QA|1S7UD	1BIIA|1LDPH|1S7QA	0/9	0/9
CY1_YEAST	40	3CX5P|3CX5W	3CX5A|3CX5P|3CX5W	3/9	0/9
UBIQ_HUMAN	40	1NBFA|1S1QC|1XD3A|2IBIA|2K6DA|2KDFA|2KHWA|3IFWA|3IHPB|3JW0C|3LDZC	2KDFA|3IHPB|3LDZC	6/9	0/9
RPB3_YEAST	40	1TWFA|1TWFB|1TWFK	1TWFA|1TWFK|3CQZH	0/9	3/9
PSA1_YEAST	40	1RYPB|1Z7QG|3BDMD|3BDMP	1RYPB|1Z7QG|3BDMC	0/9	0/9
PSA2_YEAST	40	1G0UU|3BDMP|3BDMQ	1G0UU|1G0UW|3BDMQ	4/9	0/9
PSA3_YEAST	40	1G0UG|1G0US|1VSY7|3BDMB	1G0UG|1G0US|1VSY7	2/9	0/9
PSA4_YEAST	40	1RYPP|1VSY8	1RYPP|1VSY8|3BDMV	1/9	0/9
PSA5_YEAST	40	1G0US|1G0UZ|1VSY8	1G0US|1VSY8|1Z7QU	1/9	0/9
PSA6_YEAST	40	1RYPP|1VSY4|1Z7QU|3BDMB	1G0U1|1RYPP|1VSY4	0/9	0/9
RPB2_YEAST	40	1TWFA|1TWFK|3CQZJ|3HOYC	1TWFA|1TWFK|3HOYC	3/9	0/9
PSB7_YEAST	40	1G0UM|1G0UZ|1RYPV	1G0UM|1RYPP|3BDMP	3/9	0/9
QCR1_YEAST	40	3CX5D|3CX5N|3CX5P|3CX5R|3CX5S	3CX5D|3CX5N|3CX5P|3CX5S	6/12	0/12
QCR6_YEAST	40	3CX5D|3CX5H	3CX5D|3CX5H|3CX5I	0/9	0/9
RPB1_YEAST	40	1TWFB|2B8KG|3CQZF|3HOUP	1TWFB|3CQZF|3HOUP	9/9	0/9
B2MG_MOUSE	41	1BIIA|1CD1C|1K8DA|1LDPH|1S7QA|1S7UD	1BIIA|1K8DA|1LDPH|1S7QA|1S7UD	3/15	0/15
CY1_YEAST	41	3CX5P|3CX5W	3CX5A|3CX5P|3CX5W	5/9	0/9
UBIQ_HUMAN	41	1NBFA|1S1QC|1XD3A|2IBIA|2K6DA|2KDFA|2KHWA|3IFWA|3IHPB|3JW0C|3LDZC	1NBFA|2KDFA|3JW0C|3LDZC	3/12	0/12
RPB3_YEAST	41	1TWFA|1TWFB|1TWFK	1TWFA|1TWFB|1TWFK	3/9	0/9
PSA1_YEAST	41	1RYPB|1Z7QG|3BDMD|3BDMP	1RYPB|1Z7QG|3BDMD	1/9	0/9
PSA2_YEAST	41	1G0UW|3BDMP	1G0UU|1G0UW|3BDMP	0/9	0/9
PSA3_YEAST	41	1G0UG|1G0US|1RYPB|3BDMB	1G0UG|1RYPB|3BDMB	0/9	0/9
PSA4_YEAST	41	1RYPP|1VSY8	1RYPP|1VSY8|3BDMV	0/9	0/9
PSA5_YEAST	41	1G0US|1RYPP|3BDMP|3BDMQ	1G0US|1RYPP|3BDMP	3/9	0/9
PSA6_YEAST	41	1RYPP|1VSY4|1Z7QU|3BDMB	1G0U1|1RYPP|1VSY4	0/9	0/9
RPB2_YEAST	41	1TWFA|1TWFK|3CQZJ|3HOYC	1TWFA|1TWFK|3HOYC	3/9	0/9
PSB7_YEAST	41	1G0UM|1G0UZ|1RYPV	1G0UZ|1RYPL|1RYPV	0/9	0/9
QCR1_YEAST	41	3CX5D|3CX5N|3CX5P|3CX5R|3CX5S	3CX5D|3CX5N|3CX5P|3CX5S	7/12	0/12
QCR6_YEAST	41	3CX5D|3CX5H	3CX5D|3CX5H|3CX5I	0/9	0/9
RPB1_YEAST	41	1TWFB|1TWFK|3CQZH|3HOYC	1TWFB|2B8KG|3CQZH	2/9	3/9
B2MG_MOUSE	42	1BIIA|1CD1C|1K8DA|1LDPH|1S7QA|1S7UD	1BIIA|1LDPH|1S7UD	2/9	0/9
CY1_YEAST	42	3CX5A|3CX5C|3CX5H|3CX5I|3CX5P	3CX5A|3CX5I|3CX5W	3/9	0/9
UBIQ_HUMAN	42	1NBFA|1S1QC|1XD3A|2IBIA|2K6DA|2KDFA|2KHWA|3IFWA|3IHPB|3JW0C|3LDZC	2IBIA|3IHPB|3JW0C|3LDZC	6/12	0/12
RPB3_YEAST	42	1TWFA|1TWFB|1TWFK	1TWFA|1TWFB|1TWFK	3/9	0/9
PSA1_YEAST	42	1VSY5|1Z7QG|3BDMD|3BDMP	1RYPB|1VSY5|3BDMC	0/9	0/9
PSA2_YEAST	42	1G0UU|3BDMP|3BDMQ	1G0UU|1VSY7|3BDMQ	0/9	1/9
PSA3_YEAST	42	1G0UG|1G0US|1VSY7|3BDMB	1G0UG|1RYPH|1VSY7	0/9	0/9
PSA4_YEAST	42	1RYPP|1VSY8	1RYPP|1VSY8|3BDMV	0/9	0/9
PSA5_YEAST	42	1G0US|1G0UZ|1VSY8	1G0US|1G0UZ|3BDMQ	0/9	2/9
PSA6_YEAST	42	1G0U1|1RYPH|3BDMH	1G0U1|1VSY4|3BDMC	0/9	0/9
RPB2_YEAST	42	1TWFA|1TWFK|3CQZJ|3HOYC	1TWFA|1TWFK|3HOYC	0/9	0/9
PSB7_YEAST	42	1G0UI|1G0UZ|1RYPL	1G0UZ|1RYPL|1RYPP	0/9	0/9
QCR1_YEAST	42	3CX5D|3CX5N|3CX5P|3CX5R|3CX5S	3CX5D|3CX5N|3CX5P|3CX5S	5/12	0/12
QCR6_YEAST	42	3CX5D|3CX5H	3CX5D|3CX5H|3CX5I	0/9	0/9
RPB1_YEAST	42	1TWFB|1TWFK|3CQZH|3HOYC	1TWFB|3CQZH|3HOUP	5/9	0/9
B2MG_MOUSE	43	1BIIA|1CD1C|1K8DA|1LDPH|1S7QA|1S7UD	1BIIA|1LDPH|1S7QA|1S7UD	0/12	0/12
CY1_YEAST	43	3CX5P|3CX5W	3CX5A|3CX5P|3CX5W	5/9	0/9
UBIQ_HUMAN	43	1NBFA|1S1QC|1XD3A|2IBIA|2K6DA|2KDFA|2KHWA|3IFWA|3IHPB|3JW0C|3LDZC	1NBFA|1XD3A|3IHPB|3LDZC	0/12	0/12
RPB3_YEAST	43	1TWFA|1TWFB|1TWFK	1TWFA|1TWFB|1TWFK	3/9	0/9
PSA1_YEAST	43	1RYPB|1Z7QG|3BDMD|3BDMP	1RYPB|3BDMD|3BDMP	0/9	0/9
PSA2_YEAST	43	1G0UU|3BDMP|3BDMQ	1G0UU|1VSY7|3BDMQ	0/9	0/9
PSA3_YEAST	43	1G0UG|1G0US|1VSY7|3BDMB	1G0UG|1RYPH|3BDMB	0/9	0/9
PSA4_YEAST	43	1RYPP|3BDMC|3BDMR	1RYPP|3BDMC|3BDMV	6/9	0/9
PSA5_YEAST	43	1G0US|1RYPP|3BDMP|3BDMQ	1G0UZ|1RYPP|3BDMP	0/9	0/9
PSA6_YEAST	43	1G0U1|1RYPH|3BDMH	1G0U1|1VSY4|3BDMH	0/9	0/9
RPB2_YEAST	43	1TWFA|1TWFK|3CQZJ|3HOYC	1TWFA|1TWFK|3HOYC	0/9	0/9
QCR1_YEAST	43	3CX5D|3CX5N|3CX5P|3CX5R|3CX5S	3CX5D|3CX5N|3CX5P|3CX5S	0/12	0/12
QCR6_YEAST	43	3CX5D|3CX5H	3CX5D|3CX5H|3CX5I	0/9	0/9
RPB1_YEAST	43	1TWFB|1TWFK|3CQZH|3HOYC	1TWFB|3CQZH|3HOYC	8/9	0/9
B2MG_MOUSE	44	1BIIA|1CD1C|1K8DA|1LDPH|1S7QA|1S7UD	1BIIA|1LDPH|1S7QA|1S7UD	0/12	0/12
CY1_YEAST	44	3CX5A|3CX5C|3CX5G|3CX5H|3CX5P	3CX5C|3CX5G|3CX5P	0/9	0/9
UBIQ_HUMAN	44	1NBFA|1S1QC|1XD3A|2IBIA|2K6DA|2KDFA|2KHWA|3IFWA|3IHPB|3JW0C|3LDZC	1NBFA|1XD3A|3IHPB|3LDZC	0/12	0/12
RPB3_YEAST	44	1TWFA|1TWFB|1TWFK	1TWFA|1TWFK|3CQZH	0/9	3/9
PSA1_YEAST	44	1RYPB|1Z7QG|3BDMD|3BDMP	1RYPB|3BDMD|3BDMP	0/9	0/9
PSA2_YEAST	44	1VSY7|3BDMP	1G0UU|1VSY7|3BDMP	2/9	0/9
PSA3_YEAST	44	1G0UG|1G0US|1VSY7|3BDMB	1G0UG|1RYPB|1VSY7	1/9	0/9
PSA4_YEAST	44	1RYPP|3BDMC|3BDMR	1RYPP|3BDMC|3BDMV	3/9	0/9
PSA5_YEAST	44	1G0US|1G0UZ|1VSY8	1G0UZ|1RYPP|1VSY8	3/9	0/9
PSA6_YEAST	44	1G0U1|1RYPH|3BDMH	1G0U1|1VSY4|3BDMD	0/9	0/9
RPB2_YEAST	44	1TWFA|1TWFK|3CQZJ|3HOYC	1TWFA|1TWFK|3HOYC	1/9	0/9
QCR1_YEAST	44	3CX5D|3CX5N|3CX5P|3CX5R|3CX5S	3CX5D|3CX5N|3CX5P|3CX5S	0/12	0/12
RPB1_YEAST	44	1TWFB|3CQZE|3CQZF	1TWFB|3CQZE|3CQZH	5/9	1/9
B2MG_MOUSE	45	1BIIA|1CD1C|1K8DA|1LDPH|1S7QA|1S7UD	1BIIA|1LDPH|1S7UD	0/9	0/9
CY1_YEAST	45	3CX5A|3CX5C|3CX5G|3CX5H|3CX5P	3CX5C|3CX5G|3CX5H	3/9	0/9
UBIQ_HUMAN	45	1NBFA|1S1QC|1XD3A|2IBIA|2K6DA|2KDFA|2KHWA|3IFWA|3IHPB|3JW0C|3LDZC	2IBIA|2KDFA|2KHWA|3LDZC	6/12	0/12
RPB3_YEAST	45	1TWFA|1TWFB|3CQZH	1TWFA|1TWFB|3CQZH	0/9	0/9
PSA1_YEAST	45	1VSY5|1Z7QG|3BDMD|3BDMP	1RYPB|1VSY5|3BDMP	6/9	0/9
PSA2_YEAST	45	1G0UU|1VSY7	1G0UU|1VSY7|3BDMR	0/9	0/9
PSA3_YEAST	45	1G0UG|1G0US|1VSY7|3BDMB	1G0UG|1VSY7|3BDMD	2/9	0/9
PSA4_YEAST	45	1RYPP|3BDMC|3BDMR	1RYPP|3BDMC|3BDMV	0/9	0/9
PSA5_YEAST	45	1G0UZ|1RYPZ	1G0UZ|1RYPP|1Z7QU	0/9	3/9
PSA6_YEAST	45	1RYPP|1VSY4|1Z7QU|3BDMB	1G0U1|1VSY4|3BDMB	0/9	0/9
RPB2_YEAST	45	1TWFA|1TWFK|3CQZJ|3HOYC	1TWFA|3CQZJ|3HOYC	4/9	0/9
QCR1_YEAST	45	3CX5D|3CX5N|3CX5P|3CX5R|3CX5S	3CX5D|3CX5N|3CX5P|3CX5S	6/12	0/12
RPB1_YEAST	45	1TWFB|2B8KG|3CQZF|3HOUP	1TWFB|2B8KG|3HOUP	0/9	0/9
B2MG_MOUSE	46	1BIIA|1CD1C|1K8DA|1LDPH|1S7QA|1S7UD	1BIIA|1LDPH|1S7UD	2/9	0/9
CY1_YEAST	46	3CX5A|3CX5C|3CX5H|3CX5I|3CX5P	3CX5C|3CX5H|3CX5I	2/9	0/9
UBIQ_HUMAN	46	1NBFA|1S1QC|1XD3A|2IBIA|2K6DA|2KDFA|2KHWA|3IFWA|3IHPB|3JW0C|3LDZC	2KDFA|3IHPB|3LDZC	9/9	0/9
RPB3_YEAST	46	1TWFA|1TWFB|3CQZH	1TWFA|3CQZH|3CQZJ	0/9	1/9
PSA1_YEAST	46	1RYPB|1Z7QG|3BDMD|3BDMP	1RYPB|1Z7QG|3BDMP	0/9	0/9
PSA2_YEAST	46	1G0UU|1VSY7	1G0UU|1VSY7|3BDMR	0/9	0/9
PSA3_YEAST	46	1G0UG|1G0US|1VSY7|3BDMB	1G0UG|1VSY7|3BDMD	2/9	0/9
PSA4_YEAST	46	1VSY8|3BDMC	1RYPP|1VSY8|3BDMC	0/9	3/9
PSA5_YEAST	46	1G0UZ|1RYPZ	1G0UZ|1RYPP|1RYPZ	2/9	0/9
PSA6_YEAST	46	1G0U1|1RYPH|3BDMH	1G0U1|1VSY4|3BDMH	2/9	3/9
RPB2_YEAST	46	1TWFK|3CQZJ|3CQZL|3HOYC	1TWFA|3CQZL|3HOYC	9/9	0/9
QCR1_YEAST	46	3CX5D|3CX5N|3CX5P|3CX5R|3CX5S	3CX5D|3CX5N|3CX5P|3CX5S	5/12	0/12
RPB1_YEAST	46	1TWFB|3K7AM	1TWFB|3HOUP|3K7AM	0/9	3/9
B2MG_MOUSE	47	1BIIA|1CD1C|1K8DA|1LDPH|1S7QA|1S7UD	1K8DA|1LDPH|1S7UD	9/9	0/9
CY1_YEAST	47	3CX5A|3CX5C|3CX5H|3CX5I|3CX5P	3CX5C|3CX5H|3CX5I	4/9	0/9
UBIQ_HUMAN	47	1NBFA|1S1QC|1XD3A|2IBIA|2K6DA|2KDFA|2KHWA|3IFWA|3IHPB|3JW0C|3LDZC	2KDFA|3IHPB|3LDZC	5/9	0/9
RPB3_YEAST	47	1TWFA|1TWFB|3CQZH	1TWFA|1TWFB|3CQZH	0/9	0/9
PSA1_YEAST	47	1VSY5|1Z7QG|3BDMD|3BDMP	1VSY5|1Z7QG|3BDMD	0/9	0/9
PSA2_YEAST	47	1G0UU|3BDMP|3BDMQ	1G0UU|1VSY7|3BDMQ	0/9	1/9
PSA3_YEAST	47	1G0UG|1G0US|1VSY7|3BDMB	1G0UG|1VSY7|3BDMD	0/9	0/9
PSA4_YEAST	47	1RYPP|3BDMC|3BDMR	1RYPP|3BDMR|3BDMV	0/9	0/9
PSA5_YEAST	47	1G0US|1G0UZ|1VSY8	1G0UZ|1VSY8|3BDMQ	0/9	3/9
PSA6_YEAST	47	1RYPP|1VSY4|1Z7QU|3BDMB	1G0U1|1Z7QU|3BDMB	0/9	0/9
RPB2_YEAST	47	1TWFK|3CQZJ|3CQZL|3HOYC	1TWFA|3CQZL|3HOYC	6/9	0/9
QCR1_YEAST	47	3CX5D|3CX5N|3CX5P|3CX5R|3CX5S	3CX5D|3CX5N|3CX5P|3CX5S	5/12	0/12
RPB1_YEAST	47	1TWFB|3CQZE|3CQZF	1TWFI|1TWFK|3CQZE	0/9	3/9
B2MG_MOUSE	48	1BIIA|1CD1C|1K8DA|1LDPH|1S7QA|1S7UD	1K8DA|1LDPH|1S7QA|1S7UD	0/12	0/12
CY1_YEAST	48	3CX5A|3CX5C|3CX5H|3CX5I|3CX5P	3CX5C|3CX5H|3CX5I	6/9	0/9
UBIQ_HUMAN	48	1NBFA|1S1QC|1XD3A|2IBIA|2K6DA|2KDFA|2KHWA|3IFWA|3IHPB|3JW0C|3LDZC	2KDFA|3JW0C|3LDZC	3/9	0/9
RPB3_YEAST	48	1TWFA|1TWFB|3CQZH	1TWFA|3CQZH|3CQZJ	0/9	2/9
PSA1_YEAST	48	1VSY5|1Z7QG|3BDMD|3BDMP	1VSY5|1Z7QG|3BDMC	0/9	0/9
PSA2_YEAST	48	1G0UU|1VSY7	1G0UU|1G0UW|1VSY7	1/9	3/9
PSA3_YEAST	48	1G0UG|1G0US|1VSY7|3BDMB	1G0UG|1RYPB|1VSY7	0/9	0/9
PSA4_YEAST	48	1VSY8|3BDMC	1RYPY|1VSY8|3BDMC	0/9	3/9
PSA5_YEAST	48	1G0US|1G0UZ|1VSY8	1G0UZ|1VSY8|3BDMP	3/9	0/9
PSA6_YEAST	48	1RYPP|1VSY4|1Z7QU|3BDMB	1G0U1|1RYPP|3BDMB	4/9	0/9
RPB2_YEAST	48	1TWFK|3CQZJ|3CQZL|3HOYC	1TWFA|1TWFK|3CQZL	6/9	0/9
QCR1_YEAST	48	3CX5D|3CX5N|3CX5P|3CX5R|3CX5S	3CX5D|3CX5N|3CX5P|3CX5S	4/12	0/12
RPB1_YEAST	48	1TWFB|3CQZE|3CQZF	1TWFI|1TWFK|3CQZE	0/9	3/9
B2MG_MOUSE	49	1BIIA|1CD1C|1K8DA|1LDPH|1S7QA|1S7UD	1BIIA|1LDPH|1S7QA|1S7UD	1/12	0/12
CY1_YEAST	49	3CX5A|3CX5C|3CX5H|3CX5I|3CX5P	3CX5C|3CX5H|3CX5I	5/9	0/9
UBIQ_HUMAN	49	1NBFA|1S1QC|1XD3A|2IBIA|2K6DA|2KDFA|2KHWA|3IFWA|3IHPB|3JW0C|3LDZC	3IFWA|3IHPB|3LDZC	2/9	0/9
RPB3_YEAST	49	1TWFA|1TWFB|3CQZH	1TWFA|3CQZH|3CQZL	0/9	0/9
PSA1_YEAST	49	1VSY5|1Z7QG|3BDMD|3BDMP	1VSY5|1Z7QG|3BDMD	1/9	0/9
PSA2_YEAST	49	1G0UU|3BDMV	1G0UU|1VSY7|3BDMV	0/9	0/9
PSA3_YEAST	49	1G0UG|1G0US|1VSY7|3BDMB	1G0UG|1G0US|3BDMB	0/9	0/9
PSA4_YEAST	49	1VSY8|3BDMC	1RYPY|1VSY8|3BDMR	0/9	3/9
PSA5_YEAST	49	1G0US|1G0UZ|1VSY8	1G0UZ|1VSY8|1Z7QU	3/9	0/9
PSA6_YEAST	49	1G0U1|1RYPH|3BDMH	1G0U1|3BDMC|3BDMH	3/9	0/9
RPB2_YEAST	49	1TWFA|2B8KG|3CQZF	1TWFA|3CQZF|3HOYC	3/9	1/9
QCR1_YEAST	49	3CX5D|3CX5N|3CX5P|3CX5R|3CX5S	3CX5N|3CX5P|3CX5S	1/9	0/9
RPB1_YEAST	49	1TWFB|3CQZE|3CQZF	1TWFI|3CQZE|3CQZH	3/9	2/9
B2MG_MOUSE	50	1BIIA|1CD1C|1K8DA|1LDPH|1S7QA|1S7UD	1CD1C|1K8DA|1LDPH|1S7QA|1S7UD	3/15	0/15
CY1_YEAST	50	3CX5A|3CX5C|3CX5H|3CX5I|3CX5P	3CX5C|3CX5H|3CX5I	6/9	0/9
UBIQ_HUMAN	50	1NBFA|1S1QC|1XD3A|2IBIA|2K6DA|2KDFA|2KHWA|3IFWA|3IHPB|3JW0C|3LDZC	1NBFA|1S1QC|1XD3A	5/9	0/9
RPB3_YEAST	50	1TWFB|1TWFK|3CQZJ|3CQZL	1TWFA|3CQZJ|3CQZL	3/9	0/9
PSA1_YEAST	50	1VSY5|1Z7QG|3BDMD|3BDMP	1VSY5|3BDMD|3BDMP	0/9	0/9
PSA2_YEAST	50	1G0UU|3BDMP|3BDMQ	1G0UU|1VSY7|3BDMQ	0/9	1/9
PSA3_YEAST	50	1G0UG|1G0US|1VSY7|3BDMB	1G0US|1RYPB|1VSY7	0/9	0/9
PSA4_YEAST	50	1VSY8|3BDMC	1RYPY|1VSY8|3BDMR	0/9	0/9
PSA5_YEAST	50	1G0US|1RYPP|3BDMP|3BDMQ	1RYPP|1RYPZ|3BDMP	0/9	0/9
PSA6_YEAST	50	1G0U1|1RYPH|3BDMH	1G0U1|3BDMC|3BDMH	4/9	0/9
RPB2_YEAST	50	1TWFK|3CQZJ|3CQZL|3HOYC	3CQZE|3CQZH|3HOYC	0/9	0/9
QCR1_YEAST	50	3CX5D|3CX5N|3CX5P|3CX5R|3CX5S	3CX5N|3CX5P|3CX5S	4/9	0/9
RPB1_YEAST	50	1TWFB|1TWFK|3CQZH|3HOYC	1TWFI|2B8KG|3CQZH	0/9	0/9
B2MG_MOUSE	51	1BIIA|1CD1C|1K8DA|1LDPH|1S7QA|1S7UD	1K8DA|1LDPH|1S7QA|1S7UD	8/12	0/12
CY1_YEAST	51	3CX5A|3CX5C|3CX5H|3CX5I|3CX5P	3CX5C|3CX5H|3CX5I	6/9	0/9
UBIQ_HUMAN	51	1NBFA|1S1QC|1XD3A|2IBIA|2K6DA|2KDFA|2KHWA|3IFWA|3IHPB|3JW0C|3LDZC	1NBFA|1S1QC|1XD3A	3/9	0/9
RPB3_YEAST	51	1TWFA|1TWFB|1TWFK	1TWFA|1TWFB|3CQZJ	0/9	2/9
PSA1_YEAST	51	1VSY5|1Z7QG|3BDMD|3BDMP	1VSY5|3BDMC|3BDMD	1/9	0/9
PSA2_YEAST	51	1G0UU|3BDMP|3BDMQ	1G0UU|3BDMP|3BDMQ	6/9	0/9
PSA3_YEAST	51	1G0UG|1G0US|1VSY7|3BDMB	1G0US|1VSY7|3BDMD	0/9	0/9
PSA4_YEAST	51	1VSY8|3BDMC	1RYPY|1VSY8|3BDMC	0/9	0/9
PSA5_YEAST	51	1G0US|1VSY8|3BDMQ	1RYPP|1VSY8|3BDMQ	0/9	0/9
PSA6_YEAST	51	1RYPP|3BDMH	1RYPH|1RYPP|3BDMC	0/9	0/9
RPB2_YEAST	51	1TWFA|1TWFK|3CQZJ|3HOYC	1TWFA|1TWFI|1TWFK|3CQZH|3HOYC	3/15	3/15
QCR1_YEAST	51	3CX5D|3CX5N|3CX5P|3CX5R|3CX5S	3CX5N|3CX5P|3CX5S	3/9	0/9
RPB1_YEAST	51	1TWFB|1TWFK|3CQZH|3HOYC	1TWFI|1TWFK|3HOYC	0/9	3/9
B2MG_MOUSE	52	1BIIA|1CD1C|1K8DA|1LDPH|1S7QA|1S7UD	1BIIA|1LDPH|1S7UD	3/9	0/9
CY1_YEAST	52	3CX5A|3CX5C|3CX5H|3CX5I|3CX5P	3CX5C|3CX5H|3CX5I	6/9	0/9
UBIQ_HUMAN	52	1NBFA|1S1QC|1XD3A|2IBIA|2K6DA|2KDFA|2KHWA|3IFWA|3IHPB|3JW0C|3LDZC	1NBFA|1S1QC|3LDZC	8/9	0/9
RPB3_YEAST	52	1TWFB|1TWFK|3CQZJ|3CQZL	1TWFB|1TWFK|3CQZL	2/9	0/9
PSA1_YEAST	52	1VSY5|1Z7QG|3BDMD|3BDMP	1VSY5|3BDMD|3BDMP	6/9	0/9
PSA2_YEAST	52	3BDMP|3BDMQ|3BDMR	1G0UU|3BDMP|3BDMR	4/9	0/9
PSA3_YEAST	52	1G0UG|1G0US|1VSY7|3BDMB	1G0US|1VSY7|3BDMB	0/9	0/9
PSA4_YEAST	52	1VSY8|3BDMC	1VSY8|3BDMR|3BDMV	0/9	0/9
PSA5_YEAST	52	1G0US|1VSY8|3BDMQ	1RYPP|1VSY8|3BDMQ	0/9	0/9
PSA6_YEAST	52	1RYPP|1VSY4|1Z7QU|3BDMB	1RYPH|1VSY4|1Z7QU	0/9	1/9
RPB2_YEAST	52	1TWFK|3CQZJ|3CQZL|3HOYC	1TWFI|1TWFK|3CQZH|3HOYC	0/12	3/12
QCR1_YEAST	52	3CX5D|3CX5P|3CX5S|3CX5T	3CX5P|3CX5S|3CX5T	2/9	0/9
RPB1_YEAST	52	1TWFB|3CQZE|3CQZF	1TWFI|3CQZE|3HOYC	3/9	2/9
B2MG_MOUSE	53	1BIIA|1CD1C|1K8DA|1LDPH|1S7QA|1S7UD	1BIIA|1LDPH|1S7UD	3/9	0/9
CY1_YEAST	53	3CX5A|3CX5C|3CX5H|3CX5I|3CX5P	3CX5C|3CX5H|3CX5I	6/9	0/9
UBIQ_HUMAN	53	1NBFA|1S1QC|1XD3A|2IBIA|2K6DA|2KDFA|2KHWA|3IFWA|3IHPB|3JW0C|3LDZC	1NBFA|2KDFA|3IHPB	4/9	0/9
RPB3_YEAST	53	1TWFB|1TWFK|3CQZJ|3CQZL	1TWFB|1TWFK|3CQZJ	6/9	0/9
PSA1_YEAST	53	1VSY5|1Z7QG|3BDMD|3BDMP	1Z7QG|3BDMD|3BDMP	3/9	0/9
PSA2_YEAST	53	1G0UW|3BDMP	1G0UU|1G0UW|3BDMP	0/9	0/9
PSA3_YEAST	53	1G0UG|1G0US|1VSY7|3BDMB	1G0US|1VSY7|3BDMB	4/9	0/9
PSA4_YEAST	53	1VSY8|3BDMC	1VSY8|3BDMR|3BDMV	0/9	0/9
PSA5_YEAST	53	1G0US|1RYPP|3BDMP|3BDMQ	1RYPP|1Z7QU|3BDMP	0/9	0/9
PSA6_YEAST	53	1G0U1|1RYPH|3BDMH	1RYPH|1Z7QU|3BDMH	3/9	0/9
RPB2_YEAST	53	1TWFK|3CQZJ|3CQZL|3HOYC	1TWFK|3CQZH|3HOYC	0/9	0/9
QCR1_YEAST	53	3CX5D|3CX5P|3CX5S|3CX5T	3CX5P|3CX5S|3CX5T	2/9	0/9
RPB1_YEAST	53	1TWFB|1TWFK|3CQZH|3HOYC	1TWFK|3CQZF|3HOYC	0/9	3/9
B2MG_MOUSE	54	1BIIA|1CD1C|1K8DA|1LDPH|1S7QA|1S7UD	1BIIA|1LDPH|1S7QA|1S7UD	3/12	0/12
CY1_YEAST	54	3CX5C|3CX5F|3CX5H|3CX5P	3CX5C|3CX5H|3CX5P	6/9	0/9
UBIQ_HUMAN	54	1NBFA|1S1QC|1XD3A|2IBIA|2K6DA|2KDFA|2KHWA|3IFWA|3IHPB|3JW0C|3LDZC	1NBFA|2KDFA|3IHPB	4/9	0/9
RPB3_YEAST	54	1TWFB|1TWFK|3CQZJ|3CQZL	1TWFB|3CQZH|3CQZL	2/9	2/9
PSA2_YEAST	54	1G0UW|3BDMV	1G0UW|1VSY7|3BDMR	0/9	0/9
PSA3_YEAST	54	1G0UG|1G0US|1VSY7|3BDMB	1G0US|1VSY7|3BDMD	0/9	0/9
PSA4_YEAST	54	1VSY8|3BDMC	1VSY8|3BDMR|3BDMV	0/9	0/9
PSA5_YEAST	54	1G0US|1RYPP|3BDMP|3BDMQ	1RYPP|1Z7QU|3BDMQ	3/9	0/9
PSA6_YEAST	54	1RYPP|1VSY4|1Z7QU|3BDMB	1RYPH|1VSY4|3BDMB	3/9	0/9
RPB2_YEAST	54	1TWFA|1TWFI	1TWFA|1TWFI|3CQZH	3/9	3/9
QCR1_YEAST	54	3CX5D|3CX5P|3CX5S|3CX5T	3CX5M|3CX5P|3CX5T	2/9	3/9
RPB1_YEAST	54	1TWFB|1TWFK|3CQZH|3HOYC	1TWFK|3CQZH|3HOUP	3/9	2/9
B2MG_MOUSE	55	1BIIA|1CD1C|1K8DA|1LDPH|1S7QA|1S7UD	1BIIA|1LDPH|1S7QA|1S7UD	5/12	0/12
CY1_YEAST	55	3CX5A|3CX5C|3CX5H|3CX5I|3CX5P	3CX5C|3CX5H|3CX5I	6/9	0/9
UBIQ_HUMAN	55	1NBFA|1S1QC|1XD3A|2IBIA|2K6DA|2KDFA|2KHWA|3IFWA|3IHPB|3JW0C|3LDZC	1NBFA|2KDFA|3IHPB	5/9	0/9
RPB3_YEAST	55	1TWFB|1TWFK|3CQZJ|3CQZL	1TWFB|3CQZH|3CQZL	0/9	0/9
PSA2_YEAST	55	1G0UW|3BDMV	1G0UW|1VSY7|3BDMR	0/9	0/9
PSA3_YEAST	55	1G0UG|1G0US|1VSY7|3BDMB	1RYPB|1VSY7|3BDMB	2/9	0/9
PSA4_YEAST	55	1VSY8|3BDMC	1VSY8|3BDMR|3BDMV	0/9	1/9
PSA5_YEAST	55	1G0US|1RYPP|3BDMP|3BDMQ	1RYPP|3BDMP|3BDMQ	7/9	0/9
PSA6_YEAST	55	1G0U1|1RYPH|3BDMH	1RYPH|3BDMD|3BDMH	0/9	0/9
RPB2_YEAST	55	1TWFA|1TWFI	1TWFA|1TWFI|3CQZH	0/9	1/9
QCR1_YEAST	55	3CX5D|3CX5P|3CX5S|3CX5T	3CX5P|3CX5S|3CX5T	3/9	0/9
RPB1_YEAST	55	1TWFB|1TWFK|3CQZH|3HOYC	1TWFK|3CQZH|3HOYC	1/9	0/9
B2MG_MOUSE	56	1BIIA|1CD1C|1K8DA|1LDPH|1S7QA|1S7UD	1BIIA|1K8DA|1S7QA|1S7UD	12/12	0/12
CY1_YEAST	56	3CX5A|3CX5C|3CX5H|3CX5I|3CX5P	3CX5C|3CX5H|3CX5I	6/9	0/9
UBIQ_HUMAN	56	1NBFA|1S1QC|1XD3A|2IBIA|2K6DA|2KDFA|2KHWA|3IFWA|3IHPB|3JW0C|3LDZC	1NBFA|2KDFA|3JW0C	0/9	0/9
RPB3_YEAST	56	1TWFB|1TWFK|3CQZJ|3CQZL	1TWFB|3CQZH|3CQZL	0/9	0/9
PSA2_YEAST	56	1G0UW|3BDMV	1G0UW|1VSY7|3BDMV	3/9	0/9
PSA3_YEAST	56	1G0UG|1G0US|1VSY7|3BDMB	1RYPB|1VSY7|3BDMD	3/9	0/9
PSA5_YEAST	56	1G0US|1RYPP|3BDMP|3BDMQ	1RYPP|1VSY8|3BDMP	5/9	0/9
PSA6_YEAST	56	1RYPP|1VSY4|1Z7QU|3BDMB	1RYPP|1VSY4|3BDMB	3/9	0/9
RPB2_YEAST	56	1TWFA|1TWFI	1TWFA|1TWFI|1TWFK	3/9	0/9
QCR1_YEAST	56	3CX5D|3CX5P|3CX5S|3CX5T	3CX5N|3CX5S|3CX5T	3/9	0/9
RPB1_YEAST	56	3HOUP|3K7AM	1TWFK|3HOUP|3K7AM	3/9	0/9
B2MG_MOUSE	57	1BIIA|1CD1C|1K8DA|1LDPH|1S7QA|1S7UD	1CD1C|1K8DA|1S7QA|1S7UD	1/12	0/12
CY1_YEAST	57	3CX5A|3CX5C|3CX5H|3CX5I|3CX5P	3CX5C|3CX5H|3CX5I	6/9	0/9
UBIQ_HUMAN	57	1NBFA|1S1QC|1XD3A|2IBIA|2K6DA|2KDFA|2KHWA|3IFWA|3IHPB|3JW0C|3LDZC	1NBFA|2K6DA|2KDFA	3/9	0/9
RPB3_YEAST	57	1TWFB|1TWFK|3CQZJ|3CQZL	1TWFB|3CQZH|3CQZL	0/9	0/9
PSA2_YEAST	57	1G0UW|3BDMP	1G0UW|3BDMP|3BDMR	1/9	0/9
PSA3_YEAST	57	1G0UG|1G0US|1VSY7|3BDMB	1RYPB|1VSY7|3BDMD	0/9	0/9
PSA5_YEAST	57	1G0US|1RYPP|3BDMP|3BDMQ	1RYPP|1Z7QU|3BDMP	0/9	0/9
PSA6_YEAST	57	1RYPP|1VSY4|1Z7QU|3BDMB	1RYPP|1VSY4|3BDMD	3/9	0/9
RPB2_YEAST	57	1TWFA|1TWFI	1TWFA|1TWFI|1TWFK	0/9	0/9
QCR1_YEAST	57	3CX5D|3CX5P|3CX5S|3CX5T	3CX5N|3CX5S|3CX5T	3/9	0/9
RPB1_YEAST	57	1TWFB|2B8KG|3CQZF|3HOUP	2B8KG|3CQZE|3HOUP	5/9	0/9
B2MG_MOUSE	58	1BIIA|1CD1C|1K8DA|1LDPH|1S7QA|1S7UD	1CD1C|1LDPH|1S7UD	2/9	0/9
CY1_YEAST	58	3CX5C|3CX5F|3CX5H|3CX5P	3CX5C|3CX5H|3CX5P	6/9	0/9
UBIQ_HUMAN	58	1NBFA|1S1QC|1XD3A|2IBIA|2K6DA|2KDFA|2KHWA|3IFWA|3IHPB|3JW0C|3LDZC	1NBFA|2K6DA|2KDFA	5/9	0/9
RPB3_YEAST	58	1TWFB|1TWFK|3CQZJ|3CQZL	1TWFB|3CQZH|3CQZL	0/9	0/9
PSA2_YEAST	58	1G0UW|3BDMP	1G0UW|3BDMP|3BDMR	0/9	0/9
PSA3_YEAST	58	1G0UG|1G0US|1VSY7|3BDMB	1VSY7|3BDMB|3BDMD	0/9	0/9
PSA5_YEAST	58	1G0US|1RYPP|3BDMP|3BDMQ	1RYPP|1Z7QU|3BDMQ	0/9	0/9
PSA6_YEAST	58	1RYPP|3BDMH	1RYPP|1VSY4|3BDMH	3/9	0/9
RPB2_YEAST	58	1TWFA|1TWFI	1TWFA|1TWFI|3CQZH	0/9	2/9
QCR1_YEAST	58	3CX5D|3CX5P|3CX5S|3CX5T	3CX5D|3CX5M|3CX5P	0/9	0/9
RPB1_YEAST	58	1TWFB|3CQZE|3CQZF	3CQZE|3HOUP|3HOYC	3/9	3/9
B2MG_MOUSE	59	1BIIA|1CD1C|1K8DA|1LDPH|1S7QA|1S7UD	1K8DA|1LDPH|1S7QA|1S7UD	8/12	0/12
CY1_YEAST	59	3CX5C|3CX5F|3CX5H|3CX5P	3CX5C|3CX5H|3CX5P	6/9	0/9
UBIQ_HUMAN	59	1NBFA|1S1QC|1XD3A|2IBIA|2K6DA|2KDFA|2KHWA|3IFWA|3IHPB|3JW0C|3LDZC	1NBFA|2KHWA|3LDZC	3/9	0/9
RPB3_YEAST	59	1TWFB|1TWFK|3CQZJ|3CQZL	1TWFB|1TWFK|3CQZJ	6/9	0/9
PSA2_YEAST	59	1G0UW|3BDMP	1G0UW|3BDMP|3BDMR	3/9	0/9
PSA3_YEAST	59	1G0UG|1G0US|1VSY7|3BDMB	1VSY7|3BDMB|3BDMD	1/9	0/9
PSA5_YEAST	59	1G0US|1RYPP|3BDMP|3BDMQ	1RYPP|1RYPZ|3BDMQ	5/9	0/9
PSA6_YEAST	59	1RYPP|1VSY4|1Z7QU|3BDMB	1RYPP|1VSY4|3BDMD	4/9	0/9
RPB2_YEAST	59	1TWFK|3CQZJ|3CQZL|3HOYC	1TWFA|1TWFK|3CQZL	6/9	0/9
QCR1_YEAST	59	3CX5D|3CX5P|3CX5S|3CX5T	3CX5D|3CX5M|3CX5S	6/9	0/9
RPB1_YEAST	59	1TWFB|1TWFK|3CQZH|3HOYC	3CQZF|3CQZH|3HOYC	1/9	3/9
B2MG_MOUSE	60	1BIIA|1CD1C|1K8DA|1LDPH|1S7QA|1S7UD	1K8DA|1LDPH|1S7QA|1S7UD	9/12	0/12
CY1_YEAST	60	3CX5C|3CX5F|3CX5H|3CX5P	3CX5C|3CX5H|3CX5P	6/9	0/9
UBIQ_HUMAN	60	1NBFA|1S1QC|1XD3A|2IBIA|2K6DA|2KDFA|2KHWA|3IFWA|3IHPB|3JW0C|3LDZC	1NBFA|2IBIA|3IHPB	7/9	0/9
PSA2_YEAST	60	1G0UW|3BDMV	1G0UW|1VSY7|3BDMR	0/9	0/9
PSA5_YEAST	60	1G0US|1VSY8|3BDMQ	1RYPP|1VSY8|3BDMQ	0/9	0/9
PSA6_YEAST	60	1RYPP|1VSY4|1Z7QU|3BDMB	1RYPP|1VSY4|1Z7QU	0/9	0/9
RPB2_YEAST	60	1TWFA|2B8KG|3CQZF	1TWFA|1TWFK|3CQZF	4/9	0/9
QCR1_YEAST	60	3CX5D|3CX5P|3CX5S|3CX5T	3CX5D|3CX5M|3CX5S	6/9	0/9
RPB1_YEAST	60	1TWFB|1TWFK|3CQZH|3HOYC	3CQZH|3HOUP|3HOYC	0/9	2/9
B2MG_MOUSE	61	1BIIA|1CD1C|1K8DA|1LDPH|1S7QA|1S7UD	1LDPH|1S7QA|1S7UD	2/9	0/9
CY1_YEAST	61	3CX5A|3CX5C|3CX5H|3CX5I|3CX5P	3CX5C|3CX5H|3CX5I	2/9	0/9
UBIQ_HUMAN	61	1NBFA|1S1QC|1XD3A|2IBIA|2K6DA|2KDFA|2KHWA|3IFWA|3IHPB|3JW0C|3LDZC	1NBFA|3IHPB|3LDZC	8/9	0/9
PSA2_YEAST	61	1VSY7|3BDMP	1VSY7|3BDMP|3BDMR	0/9	0/9
PSA5_YEAST	61	1G0US|1VSY8|3BDMQ	1RYPZ|1VSY8|3BDMQ	3/9	0/9
PSA6_YEAST	61	1RYPP|1VSY4|1Z7QU|3BDMB	1RYPP|1Z7QU|3BDMB	3/9	0/9
RPB2_YEAST	61	1TWFA|1TWFK|3CQZJ|3HOYC	1TWFA|1TWFK|3HOYC	3/9	0/9
QCR1_YEAST	61	3CX5M|3CX5R	3CX5D|3CX5M|3CX5R	3/9	3/9
B2MG_MOUSE	62	1BIIA|1CD1C|1K8DA|1LDPH|1S7QA|1S7UD	1BIIA|1CD1C|1K8DA	0/9	0/9
CY1_YEAST	62	3CX5A|3CX5C|3CX5H|3CX5I|3CX5P	3CX5C|3CX5H|3CX5I	3/9	0/9
UBIQ_HUMAN	62	1NBFA|1S1QC|1XD3A|2IBIA|2K6DA|2KDFA|2KHWA|3IFWA|3IHPB|3JW0C|3LDZC	1NBFA|3JW0C|3LDZC	1/9	0/9
PSA2_YEAST	62	1VSY7|3BDMP	1VSY7|3BDMP|3BDMR	3/9	0/9
PSA5_YEAST	62	1G0UZ|1RYPZ	1RYPZ|1VSY8|3BDMP	3/9	0/9
PSA6_YEAST	62	1RYPP|1VSY4|1Z7QU|3BDMB	1RYPP|1Z7QU|3BDMC	3/9	0/9
RPB2_YEAST	62	1TWFA|1TWFK|3CQZJ|3HOYC	1TWFA|1TWFK|3HOYC	4/9	0/9
QCR1_YEAST	62	3CX5D|3CX5N|3CX5P|3CX5R|3CX5S	3CX5D|3CX5N|3CX5S	0/9	0/9
B2MG_MOUSE	63	1BIIA|1CD1C|1K8DA|1LDPH|1S7QA|1S7UD	1BIIA|1K8DA|1S7QA	6/9	0/9
CY1_YEAST	63	3CX5A|3CX5C|3CX5H|3CX5I|3CX5P	3CX5C|3CX5H|3CX5I	6/9	0/9
UBIQ_HUMAN	63	1NBFA|1S1QC|1XD3A|2IBIA|2K6DA|2KDFA|2KHWA|3IFWA|3IHPB|3JW0C|3LDZC	1S1QC|2IBIA|3IHPB	6/9	0/9
PSA2_YEAST	63	1VSY7|3BDMP	1VSY7|3BDMP|3BDMR	0/9	0/9
PSA5_YEAST	63	1G0US|1VSY8|3BDMQ	1RYPZ|1VSY8|3BDMQ	6/9	0/9
PSA6_YEAST	63	1RYPP|1VSY4|1Z7QU|3BDMB	1RYPP|3BDMB|3BDMD	3/9	0/9
RPB2_YEAST	63	1TWFA|2B8KG|3CQZF	1TWFA|1TWFK|3CQZF	0/9	0/9
QCR1_YEAST	63	3CX5D|3CX5N|3CX5P|3CX5R|3CX5S	3CX5D|3CX5N|3CX5S	4/9	0/9
B2MG_MOUSE	64	1BIIA|1CD1C|1K8DA|1LDPH|1S7QA|1S7UD	1BIIA|1K8DA|1S7UD	0/9	0/9
CY1_YEAST	64	3CX5C|3CX5I|3CX5P	3CX5C|3CX5I|3CX5P	8/9	0/9
UBIQ_HUMAN	64	1NBFA|1S1QC|1XD3A|2IBIA|2K6DA|2KDFA|2KHWA|3IFWA|3IHPB|3JW0C|3LDZC	1S1QC|2KDFA|2KHWA	6/9	0/9
PSA2_YEAST	64	1G0UW|3BDMV	1VSY7|3BDMQ|3BDMV	2/9	0/9
PSA5_YEAST	64	1G0US|1VSY8|3BDMQ	1RYPZ|1VSY8|3BDMQ	3/9	0/9
PSA6_YEAST	64	1RYPP|3BDMH	1RYPP|3BDMC|3BDMH	6/9	0/9
RPB2_YEAST	64	1TWFA|1TWFK|3CQZJ|3HOYC	1TWFA|1TWFK|3CQZH	2/9	0/9
QCR1_YEAST	64	3CX5D|3CX5N|3CX5P|3CX5R|3CX5S	3CX5D|3CX5P|3CX5R	0/9	0/9
B2MG_MOUSE	65	1BIIA|1CD1C|1K8DA|1LDPH|1S7QA|1S7UD	1BIIA|1K8DA|1S7QA	3/9	0/9
CY1_YEAST	65	3CX5A|3CX5C|3CX5H|3CX5I|3CX5P	3CX5C|3CX5H|3CX5I	6/9	0/9
UBIQ_HUMAN	65	1NBFA|1S1QC|1XD3A|2IBIA|2K6DA|2KDFA|2KHWA|3IFWA|3IHPB|3JW0C|3LDZC	1S1QC|2KDFA|2KHWA	6/9	0/9
PSA2_YEAST	65	1G0UW|3BDMV	1VSY7|3BDMQ|3BDMV	0/9	0/9
PSA5_YEAST	65	1G0UZ|1RYPZ	1RYPZ|1VSY8|3BDMP	0/9	0/9
PSA6_YEAST	65	1RYPP|1VSY4|1Z7QU|3BDMB	1VSY4|1Z7QU|3BDMC	3/9	0/9
RPB2_YEAST	65	1TWFA|1TWFK|3CQZJ|3HOYC	1TWFA|1TWFK|3HOYC	4/9	0/9
QCR1_YEAST	65	3CX5D|3CX5N|3CX5P|3CX5R|3CX5S	3CX5D|3CX5P|3CX5R	6/9	0/9
B2MG_MOUSE	66	1BIIA|1CD1C|1K8DA|1LDPH|1S7QA|1S7UD	1BIIA|1K8DA|1LDPH	0/9	0/9
CY1_YEAST	66	3CX5C|3CX5F|3CX5H|3CX5P	3CX5C|3CX5F|3CX5P	6/9	0/9
UBIQ_HUMAN	66	1NBFA|1S1QC|1XD3A|2IBIA|2K6DA|2KDFA|2KHWA|3IFWA|3IHPB|3JW0C|3LDZC	1S1QC|2KDFA|2KHWA	6/9	0/9
PSA2_YEAST	66	1G0UW|3BDMV	1VSY7|3BDMR|3BDMV	0/9	0/9
PSA5_YEAST	66	1G0US|1VSY8|3BDMQ	1VSY8|1Z7QU|3BDMQ	3/9	0/9
PSA6_YEAST	66	1RYPP|1VSY4|1Z7QU|3BDMB	1VSY4|1Z7QU|3BDMH	0/9	0/9
RPB2_YEAST	66	1TWFA|1TWFI	1TWFA|1TWFI|1TWFK	3/9	1/9
QCR1_YEAST	66	3CX5D|3CX5P|3CX5S|3CX5T	3CX5D|3CX5P|3CX5S	0/9	0/9
B2MG_MOUSE	67	1BIIA|1CD1C|1K8DA|1LDPH|1S7QA|1S7UD	1BIIA|1K8DA|1LDPH	0/9	0/9
CY1_YEAST	67	3CX5A|3CX5G|3CX5H|3CX5P	3CX5G|3CX5H|3CX5I	6/9	0/9
UBIQ_HUMAN	67	1NBFA|1S1QC|1XD3A|2IBIA|2K6DA|2KDFA|2KHWA|3IFWA|3IHPB|3JW0C|3LDZC	1XD3A|2IBIA|3LDZC	6/9	0/9
PSA2_YEAST	67	1G0UW|3BDMV	1VSY7|3BDMQ|3BDMV	0/9	0/9
PSA6_YEAST	67	1RYPP|1VSY4|1Z7QU|3BDMB	1VSY4|1Z7QU|3BDMD	0/9	3/9
RPB2_YEAST	67	1TWFK|3CQZJ|3CQZL|3HOYC	1TWFA|1TWFK|3CQZL	4/9	0/9
QCR1_YEAST	67	3CX5D|3CX5P|3CX5S|3CX5T	3CX5D|3CX5P|3CX5S	0/9	0/9
B2MG_MOUSE	68	1BIIA|1CD1C|1K8DA|1LDPH|1S7QA|1S7UD	1BIIA|1K8DA|1S7QA	0/9	0/9
CY1_YEAST	68	3CX5P|3CX5W	3CX5G|3CX5P|3CX5W	5/9	0/9
UBIQ_HUMAN	68	1NBFA|1S1QC|1XD3A|2IBIA|2K6DA|2KDFA|2KHWA|3IFWA|3IHPB|3JW0C|3LDZC	1XD3A|3IFWA|3JW0C	0/9	0/9
PSA2_YEAST	68	3BDMP|3BDMQ|3BDMR	3BDMP|3BDMR|3BDMV	0/9	0/9
PSA6_YEAST	68	1RYPP|1VSY4|1Z7QU|3BDMB	1VSY4|1Z7QU|3BDMH	0/9	0/9
RPB2_YEAST	68	1TWFA|1TWFK|3CQZJ|3HOYC	1TWFA|1TWFK|3CQZH	0/9	0/9
QCR1_YEAST	68	3CX5D|3CX5P|3CX5S|3CX5T	3CX5D|3CX5P|3CX5S	1/9	0/9
B2MG_MOUSE	69	1BIIA|1CD1C|1K8DA|1LDPH|1S7QA|1S7UD	1BIIA|1K8DA|1LDPH	1/9	0/9
UBIQ_HUMAN	69	1NBFA|1S1QC|1XD3A|2IBIA|2K6DA|2KDFA|2KHWA|3IFWA|3IHPB|3JW0C|3LDZC	1XD3A|3IFWA|3LDZC	3/9	0/9
PSA6_YEAST	69	1RYPP|1VSY4|1Z7QU|3BDMB	1VSY4|3BDMB|3BDMD	0/9	0/9
RPB2_YEAST	69	1TWFA|2B8KG|3HOUP	1TWFA|1TWFK|3HOUP	2/9	0/9
QCR1_YEAST	69	3CX5D|3CX5P|3CX5S|3CX5T	3CX5D|3CX5P|3CX5S	1/9	0/9
B2MG_MOUSE	70	1BIIA|1CD1C|1K8DA|1LDPH|1S7QA|1S7UD	1BIIA|1K8DA|1LDPH	1/9	0/9
UBIQ_HUMAN	70	1NBFA|1S1QC|1XD3A|2IBIA|2K6DA|2KDFA|2KHWA|3IFWA|3IHPB|3JW0C|3LDZC	1XD3A|3IFWA|3LDZC	0/9	0/9
PSA6_YEAST	70	1RYPP|3BDMH	1VSY4|3BDMC|3BDMH	0/9	3/9
RPB2_YEAST	70	1TWFA|2B8KG|3CQZF	1TWFA|1TWFK|2B8KG	2/9	3/9
QCR1_YEAST	70	3CX5D|3CX5P|3CX5S|3CX5T	3CX5D|3CX5P|3CX5S	0/9	0/9
B2MG_MOUSE	71	1BIIA|1CD1C|1K8DA|1LDPH|1S7QA|1S7UD	1BIIA|1LDPH|1S7UD	2/9	0/9
UBIQ_HUMAN	71	1NBFA|1S1QC|1XD3A|2IBIA|2K6DA|2KDFA|2KHWA|3IFWA|3IHPB|3JW0C|3LDZC	1XD3A|3IFWA|3LDZC	0/9	0/9
PSA6_YEAST	71	1RYPP|1VSY4|1Z7QU|3BDMB	1VSY4|3BDMC|3BDMD	0/9	0/9
RPB2_YEAST	71	1TWFA|1TWFK|3CQZJ|3HOYC	1TWFA|1TWFK|3HOYC	3/9	0/9
QCR1_YEAST	71	3CX5D|3CX5P|3CX5S|3CX5T	3CX5D|3CX5P|3CX5S	2/9	0/9
B2MG_MOUSE	72	1BIIA|1CD1C|1K8DA|1LDPH|1S7QA|1S7UD	1BIIA|1K8DA|1S7QA	4/9	0/9
UBIQ_HUMAN	72	1NBFA|1S1QC|1XD3A|2IBIA|2K6DA|2KDFA|2KHWA|3IFWA|3IHPB|3JW0C|3LDZC	1XD3A|3IHPB|3JW0C	3/9	0/9
PSA6_YEAST	72	1RYPP|1VSY4|1Z7QU|3BDMB	1VSY4|3BDMC|3BDMD	0/9	0/9
RPB2_YEAST	72	1TWFK|3CQZJ|3CQZL|3HOYC	1TWFA|1TWFK|3CQZL	3/9	0/9
QCR1_YEAST	72	3CX5D|3CX5P|3CX5S|3CX5T	3CX5D|3CX5P|3CX5S	0/9	0/9
B2MG_MOUSE	73	1BIIA|1CD1C|1K8DA|1LDPH|1S7QA|1S7UD	1BIIA|1S7QA|1S7UD	3/9	0/9
UBIQ_HUMAN	73	1NBFA|1S1QC|1XD3A|2IBIA|2K6DA|2KDFA|2KHWA|3IFWA|3IHPB|3JW0C|3LDZC	1XD3A|3IFWA|3JW0C	0/9	0/9
PSA6_YEAST	73	1RYPP|3BDMH	1VSY4|3BDMD|3BDMH	0/9	0/9
RPB2_YEAST	73	1TWFA|1TWFK|3CQZJ|3HOYC	1TWFA|1TWFK|3HOYC	0/9	0/9
QCR1_YEAST	73	3CX5D|3CX5P|3CX5S|3CX5T	3CX5D|3CX5P|3CX5S	6/9	0/9
B2MG_MOUSE	74	1BIIA|1CD1C|1K8DA|1LDPH|1S7QA|1S7UD	1BIIA|1K8DA|1S7QA	5/9	0/9
UBIQ_HUMAN	74	1NBFA|1S1QC|1XD3A|2IBIA|2K6DA|2KDFA|2KHWA|3IFWA|3IHPB|3JW0C|3LDZC	2IBIA|2KDFA|2KHWA	4/9	0/9
PSA6_YEAST	74	1RYPP|3BDMH	1VSY4|3BDMC|3BDMH	0/9	0/9
RPB2_YEAST	74	1TWFA|1TWFI	1TWFA|1TWFI|1TWFK	0/9	0/9
QCR1_YEAST	74	3CX5D|3CX5N|3CX5P|3CX5R|3CX5S	3CX5D|3CX5P|3CX5R	6/9	0/9
B2MG_MOUSE	75	1BIIA|1CD1C|1K8DA|1LDPH|1S7QA|1S7UD	1BIIA|1K8DA|1S7QA	5/9	0/9
UBIQ_HUMAN	75	1NBFA|1S1QC|1XD3A|2IBIA|2K6DA|2KDFA|2KHWA|3IFWA|3IHPB|3JW0C|3LDZC	2IBIA|2KDFA|2KHWA	6/9	0/9
PSA6_YEAST	75	1RYPP|1VSY4|1Z7QU|3BDMB	1Z7QU|3BDMB|3BDMD	1/9	0/9
RPB2_YEAST	75	1TWFA|1TWFI	1TWFA|1TWFI|1TWFK	0/9	0/9
QCR1_YEAST	75	3CX5M|3CX5R	3CX5D|3CX5M|3CX5R	3/9	3/9
B2MG_MOUSE	76	1BIIA|1CD1C|1K8DA|1LDPH|1S7QA|1S7UD	1CD1C|1K8DA|1LDPH	0/9	0/9
UBIQ_HUMAN	76	1NBFA|1S1QC|1XD3A|2IBIA|2K6DA|2KDFA|2KHWA|3IFWA|3IHPB|3JW0C|3LDZC	2IBIA|2KDFA|2KHWA	6/9	0/9
PSA6_YEAST	76	1RYPP|3BDMH	1Z7QU|3BDMC|3BDMH	0/9	0/9
RPB2_YEAST	76	1TWFA|1TWFI	1TWFA|1TWFI|1TWFK	0/9	0/9
QCR1_YEAST	76	3CX5D|3CX5P|3CX5S|3CX5T	3CX5D|3CX5P|3CX5S	3/9	0/9
B2MG_MOUSE	77	1BIIA|1CD1C|1K8DA|1LDPH|1S7QA|1S7UD	1CD1C|1LDPH|1S7UD	2/9	0/9
UBIQ_HUMAN	77	1NBFA|1S1QC|1XD3A|2IBIA|2K6DA|2KDFA|2KHWA|3IFWA|3IHPB|3JW0C|3LDZC	2KDFA|3IFWA|3IHPB	2/9	0/9
PSA6_YEAST	77	1RYPP|1VSY4|1Z7QU|3BDMB	3BDMB|3BDMC|3BDMD	3/9	0/9
RPB2_YEAST	77	1TWFA|1TWFK|3CQZJ|3HOYC	1TWFA|1TWFK|3CQZH	1/9	0/9
QCR1_YEAST	77	3CX5D|3CX5P|3CX5S|3CX5T	3CX5D|3CX5P|3CX5S	2/9	0/9
B2MG_MOUSE	78	1BIIA|1CD1C|1K8DA|1LDPH|1S7QA|1S7UD	1CD1C|1LDPH|1S7UD	2/9	0/9
UBIQ_HUMAN	78	1NBFA|1S1QC|1XD3A|2IBIA|2K6DA|2KDFA|2KHWA|3IFWA|3IHPB|3JW0C|3LDZC	2KDFA|3IFWA|3IHPB	0/9	0/9
PSA6_YEAST	78	1RYPP|3BDMH	3BDMB|3BDMD|3BDMH	0/9	0/9
RPB2_YEAST	78	1TWFA|2B8KG|3CQZF	1TWFA|2B8KG|3CQZE	0/9	0/9
QCR1_YEAST	78	3CX5D|3CX5P|3CX5S|3CX5T	3CX5D|3CX5P|3CX5S	3/9	0/9
B2MG_MOUSE	79	1BIIA|1CD1C|1K8DA|1LDPH|1S7QA|1S7UD	1CD1C|1LDPH|1S7UD	3/9	0/9
UBIQ_HUMAN	79	1NBFA|1S1QC|1XD3A|2IBIA|2K6DA|2KDFA|2KHWA|3IFWA|3IHPB|3JW0C|3LDZC	2KDFA|3IHPB|3LDZC	7/9	0/9
PSA6_YEAST	79	1RYPP|3BDMH	3BDMB|3BDMD|3BDMH	0/9	3/9
RPB2_YEAST	79	1TWFA|2B8KG|3HOUP	1TWFA|2B8KG|3HOUP	0/9	0/9
QCR1_YEAST	79	3CX5D|3CX5P|3CX5S|3CX5T	3CX5D|3CX5P|3CX5S	6/9	0/9
B2MG_MOUSE	80	1BIIA|1CD1C|1K8DA|1LDPH|1S7QA|1S7UD	1CD1C|1LDPH|1S7UD	3/9	0/9
UBIQ_HUMAN	80	1NBFA|1S1QC|1XD3A|2IBIA|2K6DA|2KDFA|2KHWA|3IFWA|3IHPB|3JW0C|3LDZC	2KDFA|3IFWA|3IHPB	9/9	0/9
RPB2_YEAST	80	1TWFA|2B8KG|3CQZF	1TWFA|2B8KG|3CQZH	0/9	0/9
QCR1_YEAST	80	3CX5D|3CX5N|3CX5P|3CX5R|3CX5S	3CX5D|3CX5N|3CX5S	3/9	0/9
B2MG_MOUSE	81	1BIIA|1CD1C|1K8DA|1LDPH|1S7QA|1S7UD	1CD1C|1LDPH|1S7UD	1/9	0/9
UBIQ_HUMAN	81	1NBFA|1S1QC|1XD3A|2IBIA|2K6DA|2KDFA|2KHWA|3IFWA|3IHPB|3JW0C|3LDZC	2KDFA|3IHPB|3JW0C	5/9	0/9
RPB2_YEAST	81	1TWFA|2B8KG|3CQZF	1TWFA|2B8KG|3CQZF	0/9	0/9
QCR1_YEAST	81	3CX5D|3CX5N|3CX5P|3CX5R|3CX5S	3CX5D|3CX5N|3CX5S	3/9	0/9
B2MG_MOUSE	82	1BIIA|1CD1C|1K8DA|1LDPH|1S7QA|1S7UD	1CD1C|1S7QA|1S7UD	1/9	0/9
UBIQ_HUMAN	82	1NBFA|1S1QC|1XD3A|2IBIA|2K6DA|2KDFA|2KHWA|3IFWA|3IHPB|3JW0C|3LDZC	2KDFA|3IHPB|3LDZC	5/9	0/9
RPB2_YEAST	82	1TWFA|2B8KG|3CQZF	1TWFA|3CQZE|3CQZH	0/9	1/9
QCR1_YEAST	82	3CX5D|3CX5N|3CX5P|3CX5R|3CX5S	3CX5D|3CX5N|3CX5S	3/9	0/9
B2MG_MOUSE	83	1BIIA|1CD1C|1K8DA|1LDPH|1S7QA|1S7UD	1CD1C|1LDPH|1S7UD	6/9	0/9
UBIQ_HUMAN	83	1NBFA|1S1QC|1XD3A|2IBIA|2K6DA|2KDFA|2KHWA|3IFWA|3IHPB|3JW0C|3LDZC	2KDFA|2KHWA|3JW0C	3/9	0/9
RPB2_YEAST	83	1TWFA|1TWFK|3CQZJ|3HOYC	1TWFA|3CQZE|3HOYC	5/9	0/9
QCR1_YEAST	83	3CX5D|3CX5P|3CX5S|3CX5T	3CX5D|3CX5P|3CX5S	4/9	0/9
B2MG_MOUSE	84	1BIIA|1CD1C|1K8DA|1LDPH|1S7QA|1S7UD	1K8DA|1LDPH|1S7QA	0/9	0/9
UBIQ_HUMAN	84	1NBFA|1S1QC|1XD3A|2IBIA|2K6DA|2KDFA|2KHWA|3IFWA|3IHPB|3JW0C|3LDZC	2KDFA|3JW0C|3LDZC	0/9	0/9
RPB2_YEAST	84	1TWFA|2B8KG|3HOUP	1TWFA|3CQZE|3HOUP	2/9	0/9
QCR1_YEAST	84	3CX5D|3CX5P|3CX5S|3CX5T	3CX5D|3CX5P|3CX5S	6/9	0/9
B2MG_MOUSE	85	1BIIA|1CD1C|1K8DA|1LDPH|1S7QA|1S7UD	1K8DA|1LDPH|1S7UD	6/9	0/9
UBIQ_HUMAN	85	1NBFA|1S1QC|1XD3A|2IBIA|2K6DA|2KDFA|2KHWA|3IFWA|3IHPB|3JW0C|3LDZC	2KDFA|3IHPB|3LDZC	6/9	0/9
RPB2_YEAST	85	1TWFA|2B8KG|3HOUP	1TWFA|3CQZE|3HOUP	0/9	0/9
QCR1_YEAST	85	3CX5D|3CX5P|3CX5S|3CX5T	3CX5D|3CX5P|3CX5S	4/9	0/9
B2MG_MOUSE	86	1BIIA|1CD1C|1K8DA|1LDPH|1S7QA|1S7UD	1K8DA|1LDPH|1S7UD	6/9	0/9
UBIQ_HUMAN	86	1NBFA|1S1QC|1XD3A|2IBIA|2K6DA|2KDFA|2KHWA|3IFWA|3IHPB|3JW0C|3LDZC	2KDFA|3IHPB|3LDZC	6/9	0/9
RPB2_YEAST	86	1TWFA|1TWFK|3CQZJ|3HOYC	1TWFA|3CQZH|3HOYC	0/9	0/9
QCR1_YEAST	86	3CX5D|3CX5N|3CX5P|3CX5R|3CX5S	3CX5D|3CX5N|3CX5S	3/9	0/9
B2MG_MOUSE	87	1BIIA|1CD1C|1K8DA|1LDPH|1S7QA|1S7UD	1K8DA|1LDPH|1S7UD	0/9	0/9
UBIQ_HUMAN	87	1NBFA|1S1QC|1XD3A|2IBIA|2K6DA|2KDFA|2KHWA|3IFWA|3IHPB|3JW0C|3LDZC	2KDFA|3IHPB|3LDZC	6/9	0/9
RPB2_YEAST	87	1TWFA|1TWFK|3CQZJ|3HOYC	1TWFA|3CQZH|3CQZJ	0/9	3/9
QCR1_YEAST	87	3CX5D|3CX5P|3CX5S|3CX5T	3CX5D|3CX5P|3CX5S	6/9	0/9
B2MG_MOUSE	88	1BIIA|1CD1C|1K8DA|1LDPH|1S7QA|1S7UD	1K8DA|1S7QA|1S7UD	2/9	0/9
UBIQ_HUMAN	88	1NBFA|1S1QC|1XD3A|2IBIA|2K6DA|2KDFA|2KHWA|3IFWA|3IHPB|3JW0C|3LDZC	3IFWA|3IHPB|3LDZC	4/9	0/9
RPB2_YEAST	88	1TWFA|2B8KG|3CQZF	1TWFA|3CQZH|3CQZL	0/9	3/9
QCR1_YEAST	88	3CX5D|3CX5N|3CX5P|3CX5R|3CX5S	3CX5M|3CX5N|3CX5S	3/9	0/9
B2MG_MOUSE	89	1BIIA|1CD1C|1K8DA|1LDPH|1S7QA|1S7UD	1K8DA|1S7QA|1S7UD	2/9	0/9
UBIQ_HUMAN	89	1NBFA|1S1QC|1XD3A|2IBIA|2K6DA|2KDFA|2KHWA|3IFWA|3IHPB|3JW0C|3LDZC	3IFWA|3JW0C|3LDZC	6/9	0/9
RPB2_YEAST	89	1TWFA|2B8KG|3CQZF	1TWFA|3CQZE|3CQZH	0/9	0/9
QCR1_YEAST	89	3CX5D|3CX5N|3CX5P|3CX5R|3CX5S	3CX5M|3CX5N|3CX5S	3/9	0/9
B2MG_MOUSE	90	1BIIA|1CD1C|1K8DA|1LDPH|1S7QA|1S7UD	1K8DA|1S7QA|1S7UD	5/9	0/9
RPB2_YEAST	90	1TWFA|2B8KG|3CQZF	1TWFA|3CQZE|3CQZH	0/9	0/9
QCR1_YEAST	90	3CX5D|3CX5N|3CX5P|3CX5R|3CX5S	3CX5N|3CX5P|3CX5R	2/9	0/9
B2MG_MOUSE	91	1BIIA|1CD1C|1K8DA|1LDPH|1S7QA|1S7UD	1K8DA|1S7QA|1S7UD	9/9	0/9
RPB2_YEAST	91	1TWFA|2B8KG|3HOUP	1TWFA|3CQZH|3HOUP	0/9	0/9
QCR1_YEAST	91	3CX5D|3CX5N|3CX5P|3CX5R|3CX5S	3CX5N|3CX5P|3CX5S	3/9	0/9
B2MG_MOUSE	92	1BIIA|1CD1C|1K8DA|1LDPH|1S7QA|1S7UD	1K8DA|1S7QA|1S7UD	9/9	0/9
RPB2_YEAST	92	1TWFA|3K7AM	1TWFA|3CQZH|3K7AM	1/9	0/9
QCR1_YEAST	92	3CX5D|3CX5N|3CX5P|3CX5R|3CX5S	3CX5N|3CX5P|3CX5S	0/9	0/9
B2MG_MOUSE	93	1BIIA|1CD1C|1K8DA|1LDPH|1S7QA|1S7UD	1K8DA|1S7QA|1S7UD	9/9	0/9
RPB2_YEAST	93	1TWFA|1TWFI	1TWFA|1TWFI|3CQZH	0/9	1/9
QCR1_YEAST	93	3CX5D|3CX5N|3CX5P|3CX5R|3CX5S	3CX5N|3CX5P|3CX5S	4/9	0/9
B2MG_MOUSE	94	1BIIA|1CD1C|1K8DA|1LDPH|1S7QA|1S7UD	1K8DA|1S7QA|1S7UD	0/9	0/9
RPB2_YEAST	94	1TWFA|1TWFI	1TWFA|1TWFI|3CQZJ	0/9	2/9
QCR1_YEAST	94	3CX5D|3CX5N|3CX5P|3CX5R|3CX5S	3CX5N|3CX5P|3CX5S	2/9	0/9
B2MG_MOUSE	95	1BIIA|1CD1C|1K8DA|1LDPH|1S7QA|1S7UD	1LDPH|1S7QA|1S7UD	1/9	0/9
RPB2_YEAST	95	1TWFK|3CQZJ|3CQZL|3HOYC	1TWFA|3CQZL|3HOYC	3/9	0/9
QCR1_YEAST	95	3CX5D|3CX5N|3CX5P|3CX5R|3CX5S	3CX5N|3CX5P|3CX5S	0/9	0/9
B2MG_MOUSE	96	1BIIA|1CD1C|1K8DA|1LDPH|1S7QA|1S7UD	1LDPH|1S7QA|1S7UD	2/9	0/9
RPB2_YEAST	96	1TWFA|2B8KG|3HOUP	1TWFA|3HOUP|3HOYC	0/9	0/9
QCR1_YEAST	96	3CX5D|3CX5N|3CX5P|3CX5R|3CX5S	3CX5N|3CX5P|3CX5S	0/9	0/9
B2MG_MOUSE	97	1BIIA|1CD1C|1K8DA|1LDPH|1S7QA|1S7UD	1LDPH|1S7QA|1S7UD	5/9	0/9
RPB2_YEAST	97	1TWFA|2B8KG|3HOUP	1TWFA|2B8KG|3HOUP	4/9	0/9
QCR1_YEAST	97	3CX5D|3CX5N|3CX5P|3CX5R|3CX5S	3CX5P|3CX5R|3CX5S	3/9	0/9
B2MG_MOUSE	98	1BIIA|1CD1C|1K8DA|1LDPH|1S7QA|1S7UD	1LDPH|1S7QA|1S7UD	6/9	0/9
RPB2_YEAST	98	1TWFA|1TWFK|3CQZJ|3HOYC	1TWFA|3CQZH|3HOYC	0/9	0/9
B2MG_MOUSE	99	1BIIA|1CD1C|1K8DA|1LDPH|1S7QA|1S7UD	1LDPH|1S7QA|1S7UD	6/9	0/9
RPB2_YEAST	99	1TWFA|1TWFK|3CQZJ|3HOYC	1TWFA|1TWFK|3HOYC	0/9	0/9
B2MG_MOUSE	100	1BIIA|1CD1C|1K8DA|1LDPH|1S7QA|1S7UD	1LDPH|1S7QA|1S7UD	7/9	0/9
RPB2_YEAST	100	1TWFA|1TWFK|3CQZJ|3HOYC	1TWFA|1TWFK|3HOYC	3/9	0/9
B2MG_MOUSE	101	1BIIA|1CD1C|1K8DA|1LDPH|1S7QA|1S7UD	1LDPH|1S7QA|1S7UD	2/9	0/9
RPB2_YEAST	101	1TWFA|1TWFI	1TWFA|1TWFI|3HOYC	0/9	0/9
B2MG_MOUSE	102	1BIIA|1CD1C|1K8DA|1LDPH|1S7QA|1S7UD	1LDPH|1S7QA|1S7UD	1/9	0/9
RPB2_YEAST	102	1TWFA|1TWFK|3CQZJ|3HOYC	1TWFA|1TWFK|3HOYC	3/9	0/9
B2MG_MOUSE	103	1BIIA|1CD1C|1K8DA|1LDPH|1S7QA|1S7UD	1LDPH|1S7QA|1S7UD	3/9	0/9
RPB2_YEAST	103	1TWFA|1TWFK|3CQZJ|3HOYC	1TWFA|1TWFK|3HOYC	0/9	0/9
B2MG_MOUSE	104	1BIIA|1CD1C|1K8DA|1LDPH|1S7QA|1S7UD	1LDPH|1S7QA|1S7UD	0/9	0/9
RPB2_YEAST	104	1TWFA|1TWFK|3CQZJ|3HOYC	1TWFA|1TWFK|3HOYC	0/9	0/9
B2MG_MOUSE	105	1BIIA|1CD1C|1K8DA|1LDPH|1S7QA|1S7UD	1LDPH|1S7QA|1S7UD	6/9	0/9
RPB2_YEAST	105	1TWFA|1TWFK|3CQZJ|3HOYC	1TWFA|1TWFK|3HOYC	3/9	0/9
B2MG_MOUSE	106	1BIIA|1CD1C|1K8DA|1LDPH|1S7QA|1S7UD	1LDPH|1S7QA|1S7UD	9/9	0/9
RPB2_YEAST	106	1TWFA|1TWFK|3CQZJ|3HOYC	1TWFA|1TWFK|3HOYC	0/9	0/9
RPB2_YEAST	107	1TWFA|1TWFK|3CQZJ|3HOYC	1TWFA|3CQZH|3HOYC	1/9	0/9
RPB2_YEAST	108	1TWFA|3K7AM	1TWFA|3CQZH|3K7AM	1/9	0/9
RPB2_YEAST	109	1TWFK|3CQZJ|3CQZL|3HOYC	1TWFI|1TWFK|3CQZE	0/9	0/9
RPB2_YEAST	110	1TWFK|3CQZJ|3CQZL|3HOYC	1TWFI|1TWFK|3CQZE	0/9	0/9
RPB2_YEAST	111	1TWFA|1TWFI	1TWFI|3CQZE|3CQZH	2/9	0/9
RPB2_YEAST	112	1TWFK|3CQZJ|3CQZL|3HOYC	1TWFI|3CQZH|3CQZL	0/9	5/9
RPB2_YEAST	113	1TWFA|2B8KG|3CQZF	1TWFI|2B8KG|3CQZH	3/9	2/9
RPB2_YEAST	114	1TWFK|3CQZJ|3CQZL|3HOYC	1TWFI|3CQZE|3HOYC	1/9	1/9
RPB2_YEAST	115	1TWFK|3CQZJ|3CQZL|3HOYC	1TWFK|3CQZH|3CQZJ	1/9	3/9
RPB2_YEAST	116	1TWFK|3CQZJ|3CQZL|3HOYC	1TWFK|3CQZL|3K7AM	2/9	3/9
RPB2_YEAST	117	1TWFK|3CQZJ|3CQZL|3HOYC	1TWFK|3HOUP|3K7AM	3/9	0/9
RPB2_YEAST	118	1TWFA|2B8KG|3HOUP	2B8KG|3CQZL|3HOUP	3/9	3/9
RPB2_YEAST	119	1TWFA|2B8KG|3HOUP	2B8KG|3HOUP|3HOYC	0/9	0/9
RPB2_YEAST	120	1TWFA|3K7AM	3CQZE|3CQZH|3K7AM	2/9	0/9
RPB2_YEAST	121	1TWFK|3CQZJ|3CQZL|3HOYC	3CQZE|3HOUP|3HOYC	0/9	3/9
RPB2_YEAST	122	1TWFK|3CQZJ|3CQZL|3HOYC	3CQZE|3CQZL|3HOYC	6/9	0/9
RPB2_YEAST	123	1TWFA|2B8KG|3CQZF	3CQZF|3CQZH|3HOYC	0/9	3/9
RPB2_YEAST	124	1TWFK|3CQZJ|3CQZL|3HOYC	3CQZH|3CQZL|3HOYC	0/9	3/9
RPB2_YEAST	125	1TWFK|3CQZJ|3CQZL|3HOYC	3CQZJ|3CQZL|3HOYC	6/9	0/9
